# Supplementary material for: Linear and star-shaped pyrazine-containing acene dicarboximides with high electron-affinity
Source: Royal Society of Chemistry journal article supplement (doi:10.1039/c2ob25680k), 2012-01-01
Supplement: c2ob25680k.pdf [file c2ob25680k.pdf]

# Linear and Star-shaped Pyrazine-containing Acene Dicarboximides with High Electron-affinity

Jinjun Shao, Jingjing Chang, Chunyan Chi\*

*Department of Chemistry, National University of Singapore, 3 Science*

*Drive 3, Singapore, 117543*

*E-mail: [chmcc@nus.edu.sg](mailto:chmcc@nus.edu.sg)*

## Table of Contents

|                                                                                                      |     |
|------------------------------------------------------------------------------------------------------|-----|
| 1. Absorption and emission spectra for <b>1a-b</b> , <b>2a-b</b> , and <b>3</b> .....                | S2  |
| 2. Absorption spectra of <b>1a-b</b> , <b>2a-b</b> , and <b>3</b> in solution and in thin film ..... | S3  |
| 3. CV curves and DPV curves for <b>1a-b</b> , <b>2a-b</b> , and <b>3</b> .....                       | S5  |
| 4. Thermogravimetric analysis (TGA) curves for <b>1a-b</b> , <b>2a-b</b> , and <b>3</b> .....        | S6  |
| 5. Additional differential scanning calorimetry (DSC) curves for <b>1a-b</b> and <b>2b</b> .....     | S7  |
| 6. Additional polarizing optical microscopy (POM) images for <b>1a-b</b> , and <b>2b</b> .....       | S8  |
| 7. X-ray diffraction (XRD) data for <b>1a-b</b> , <b>2a-b</b> , and <b>3</b> .....                   | S9  |
| 8. Additional space-charge limited-current measurements for <b>1b</b> and <b>2b</b> .....            | S11 |
| 9. <sup>1</sup> H NMR and <sup>13</sup> C NMR spectra.....                                           | S12 |
| 10. MALDI-TOF mass spectra for <b>1a-b</b> , <b>2a-b</b> and <b>3</b> .....                          | S46 |
| 11. References .....                                                                                 | S51 |

## 1. Absorption and emission spectra of 1a-b, 2a-b, and 3

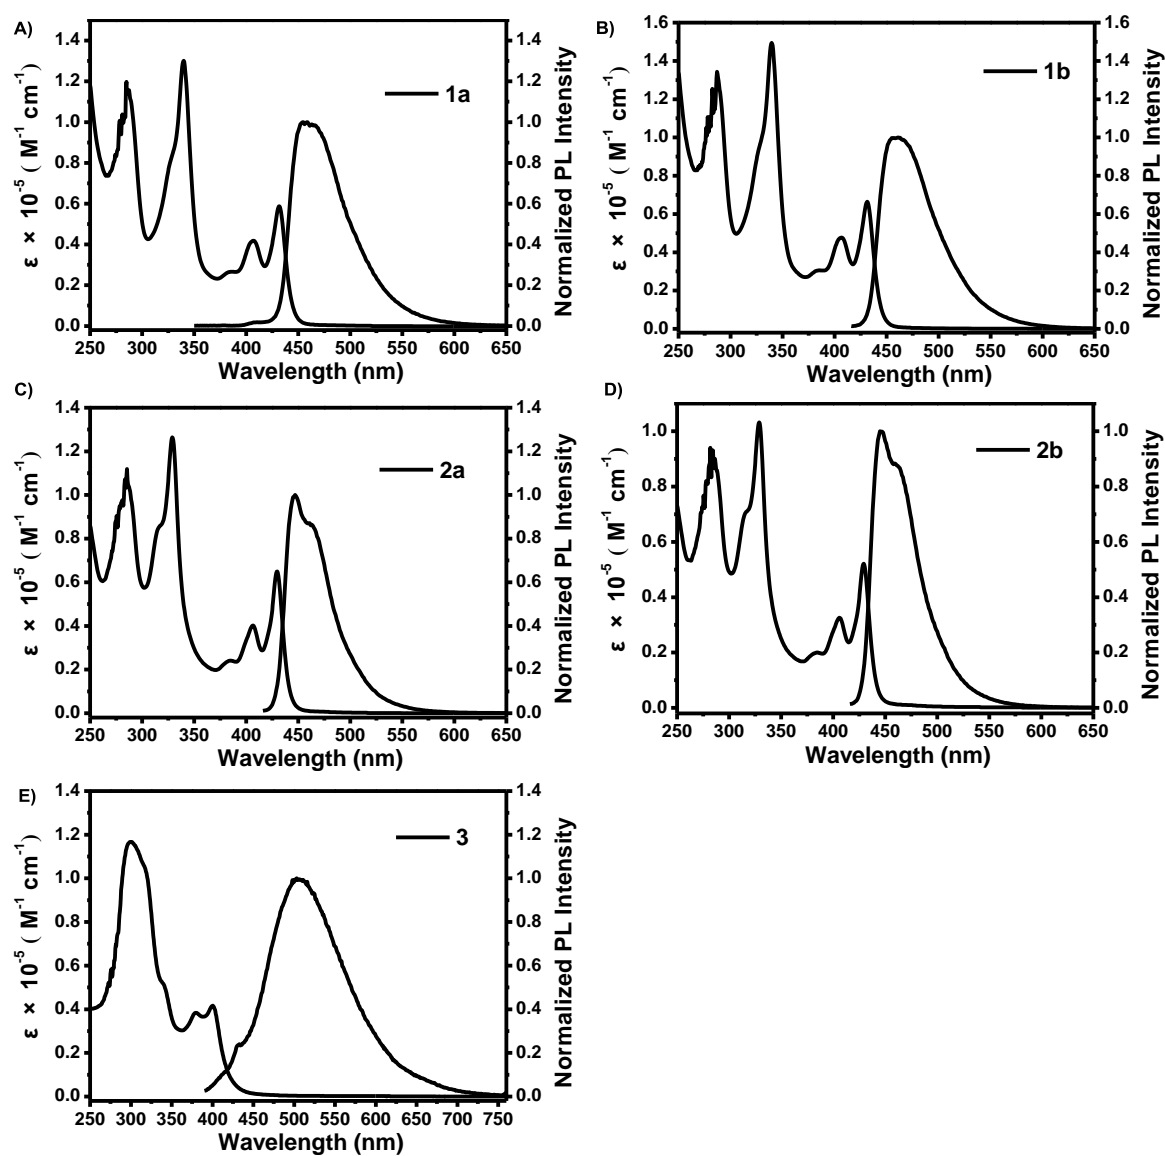

**Fig. S1.** Absorption spectra and normalized emission spectra of compounds **1a-b**, **2a-b** and **3** in THF. The emission spectra of **1a-b**, **2a-b** and **3** were recorded under the excitation wavelength of 340, 406, 406, 406 and 380 nm, respectively.

## 2. Absorption spectra of 1a-b, 2a-b, and 3 in solution and in thin film

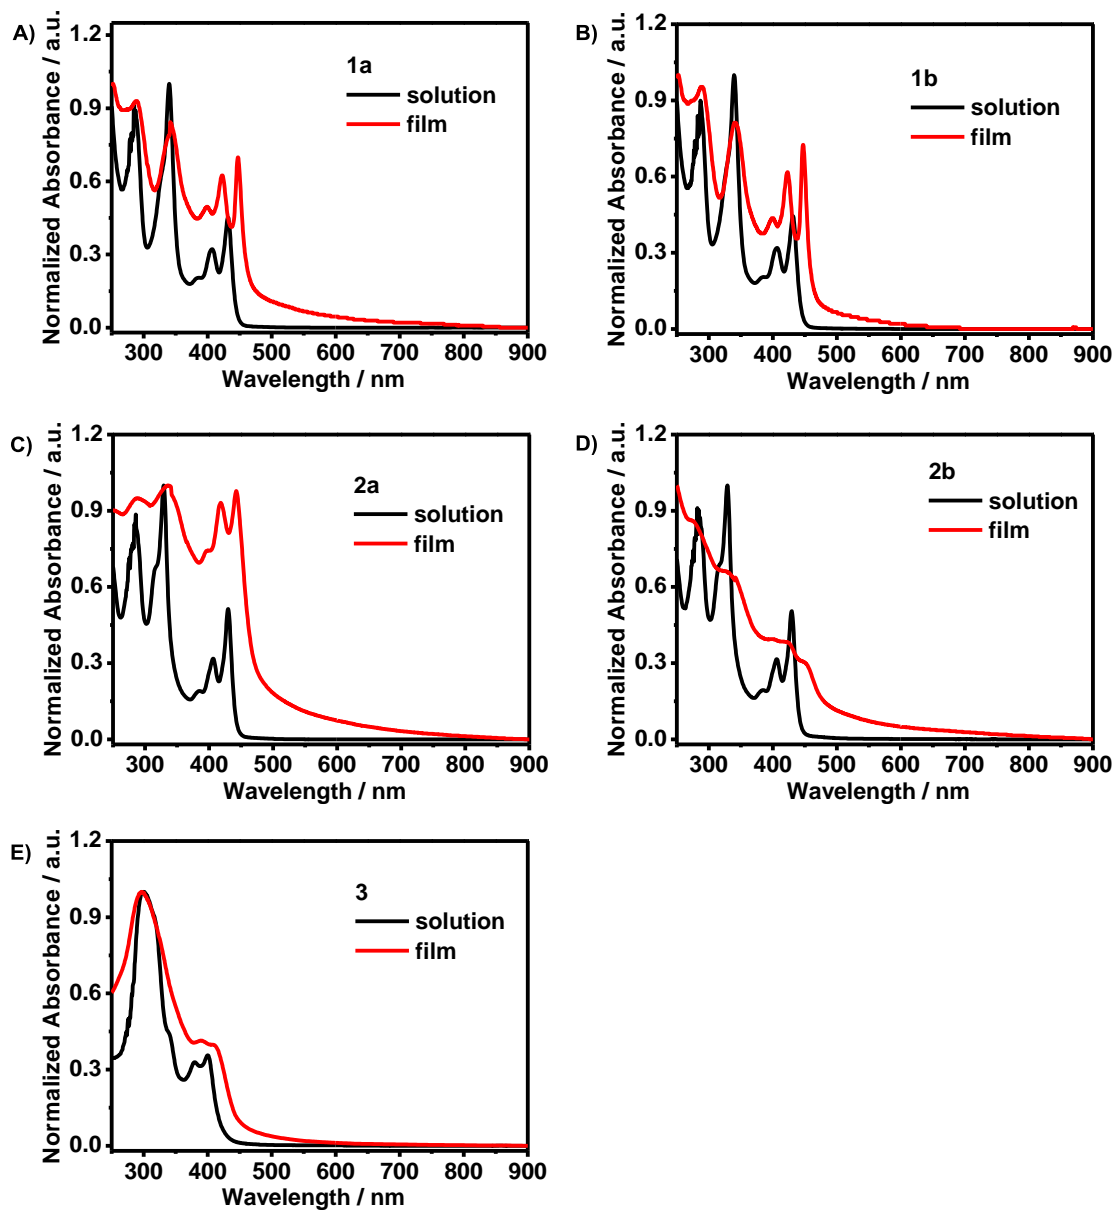

**Fig. S2.** Normalized absorption spectra in THF solution and solid film (spin-coated from  $\text{CHCl}_3$  solution) for compounds **1a-b**, **2a-b**, and **3**

*Electronic Supplementary Information (ESI) for Organic & Biomolecular Chemistry*

---

**Table S1.** UV and PL data for compounds **1a-b**, **2a-b**, and **3**

|           | Solution                           |                                                        |                                   | Film                               |
|-----------|------------------------------------|--------------------------------------------------------|-----------------------------------|------------------------------------|
|           | $\lambda_{\text{abs}} / \text{nm}$ | $\epsilon_{\text{max}} / \text{M}^{-1} \text{cm}^{-1}$ | $\lambda_{\text{PL}} / \text{nm}$ | $\lambda_{\text{abs}} / \text{nm}$ |
| <b>1a</b> | 431                                | 5800                                                   | 457                               | 447                                |
| <b>1b</b> | 431                                | 6500                                                   | 457                               | 447                                |
| <b>2a</b> | 429                                | 6400                                                   | 447                               | 442                                |
| <b>2b</b> | 429                                | 5200                                                   | 447                               | 443                                |
| <b>3</b>  | 399                                | 4100                                                   | 504                               | 411                                |

Electronic Supplementary Information (ESI) for Organic & Biomolecular Chemistry

3. CV curves and DPV curves of 1a-b, 2a-b, and 3

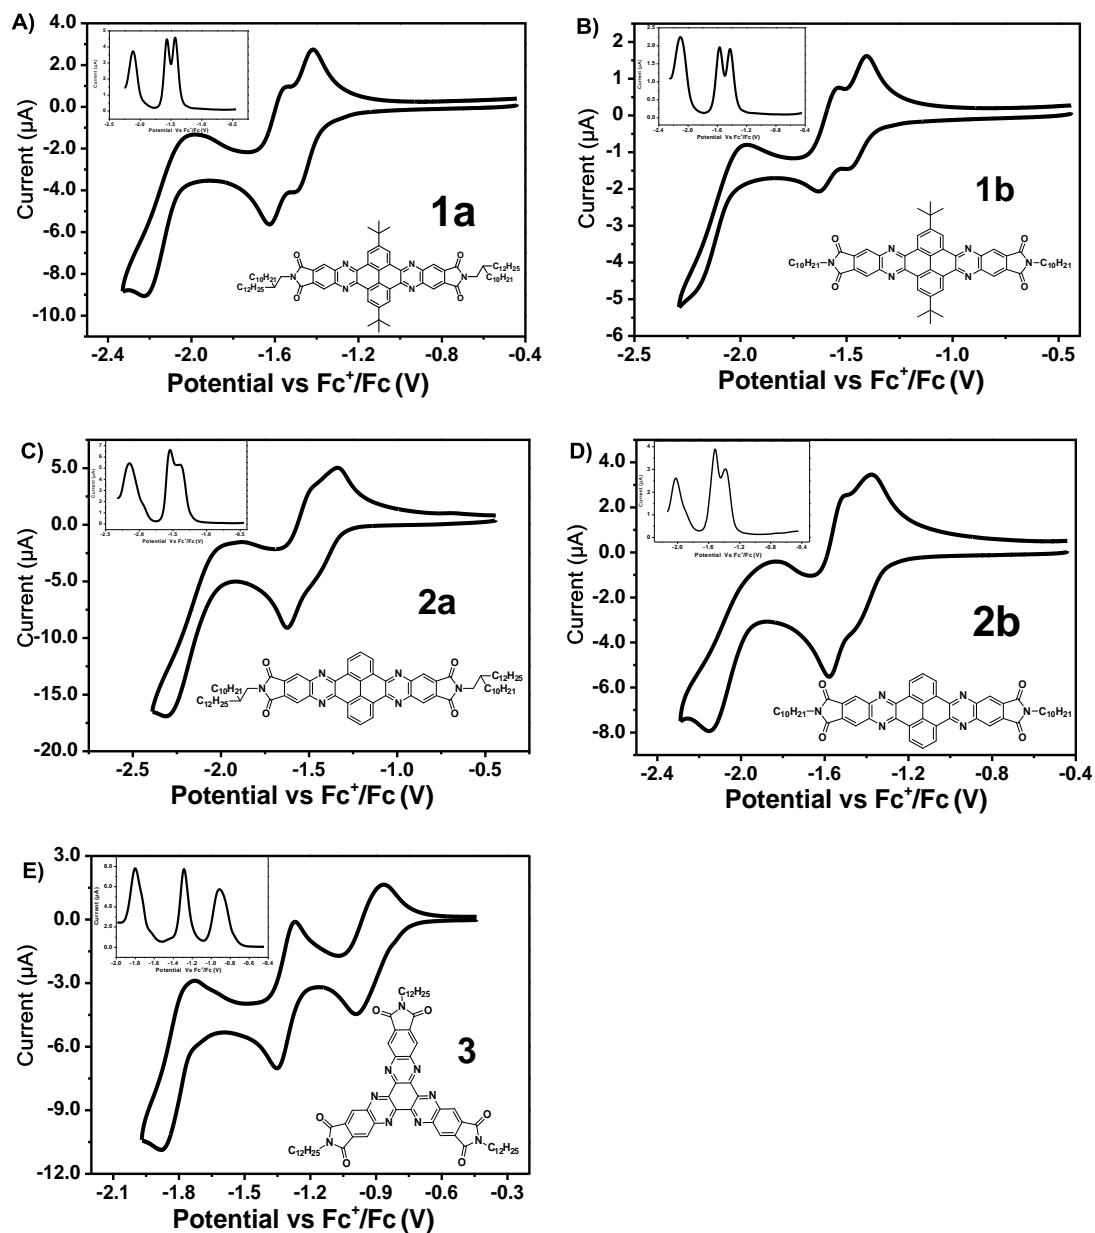

**Fig. S3.** CV curves and DPV curves (inset) for compounds **1a-b**, **2a-b**, and **3** in DCM with 0.1 M Bu<sub>4</sub>NPF<sub>6</sub> as supporting electrolyte, a gold electrode with a diameter of 2 mm, a Pt wire, and an Ag/AgCl electrode were used as the working electrode, the counter electrode, and the reference electrode, respectively, with a scan rate at 100 mV/s.

#### 4. Thermogravimetric analysis (TGA) curves for 1a-b, 2a-b, and 3.

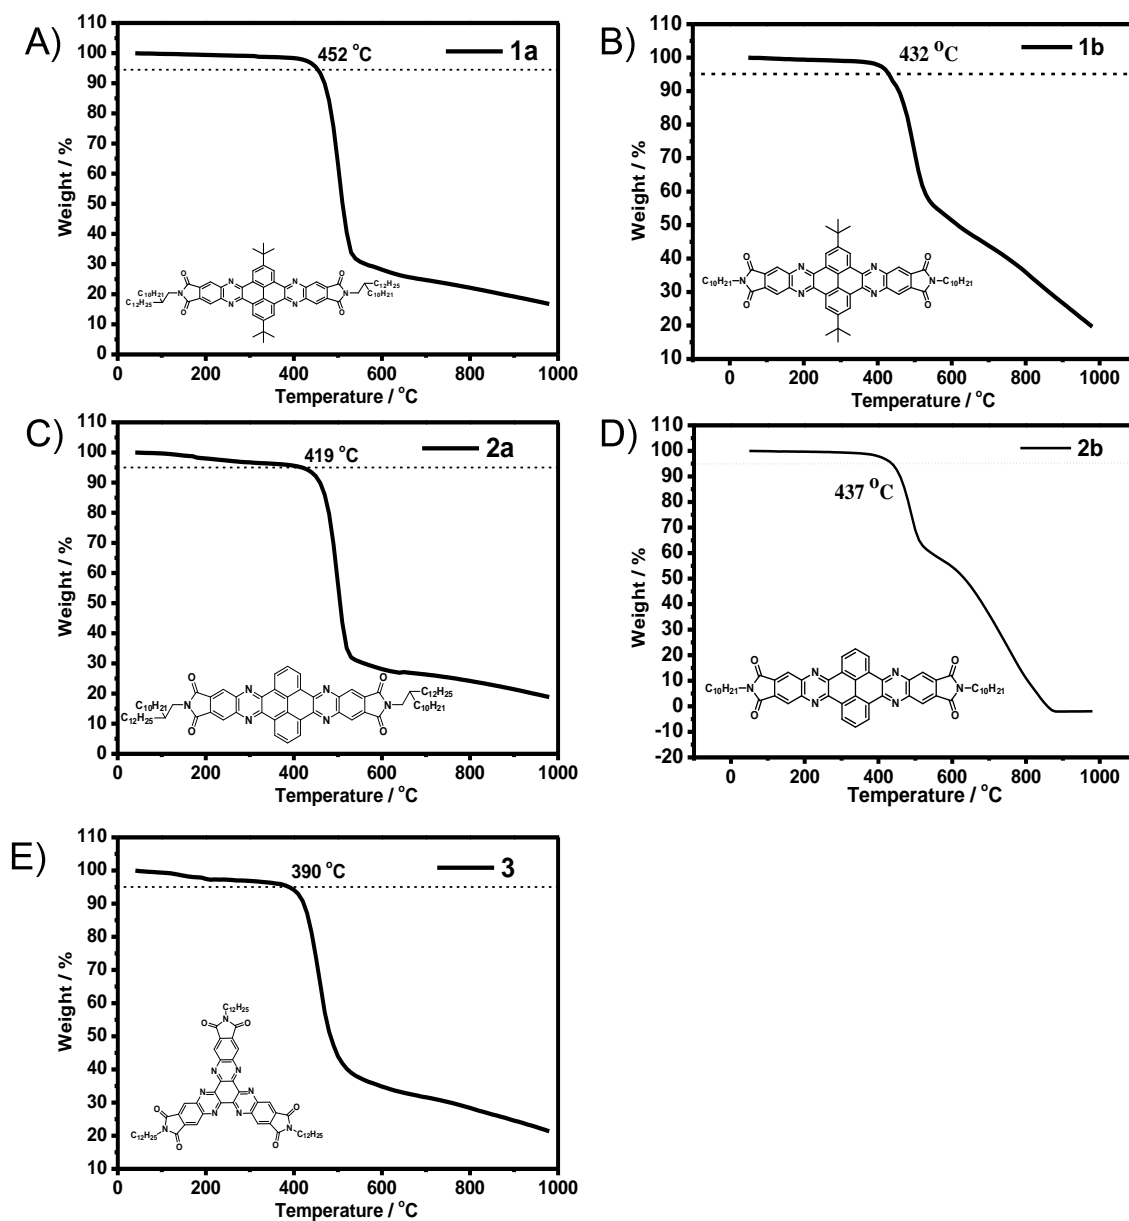

**Fig. S4.** Thermogravimetric analysis (TGA) curves for compounds **1a-b**, **2a-b**, and **3** with a heating rate of 10 °C/min under nitrogen.

5. Additional differential scanning calorimetry (DSC) curves for 1a-b and 2b.

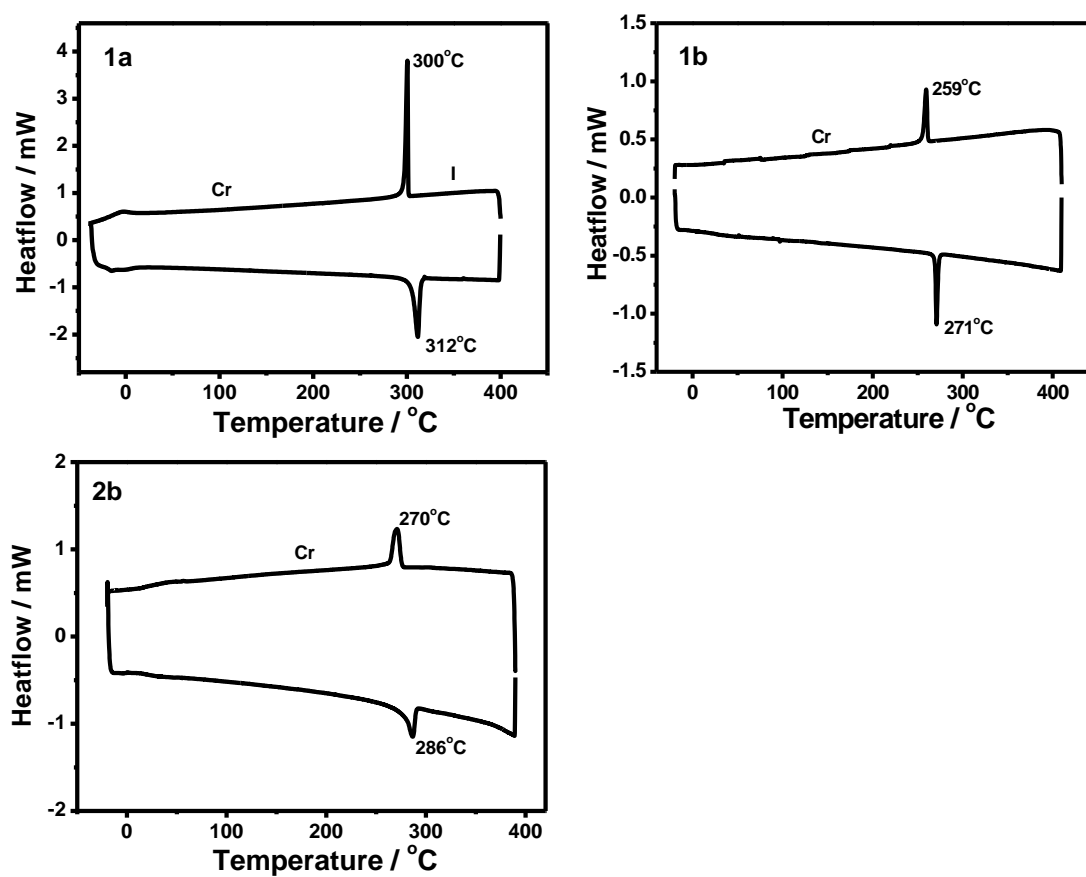

**Fig. S5.** DSC curves for compounds **1a-b** and **2b** with a heating/cooling scan rate of 10 °C/min under nitrogen (Cr = crystalline phase, I = isotropic phase).

**6. Additional polarizing optical microscopy (POM) images of 1a-b and 2b**

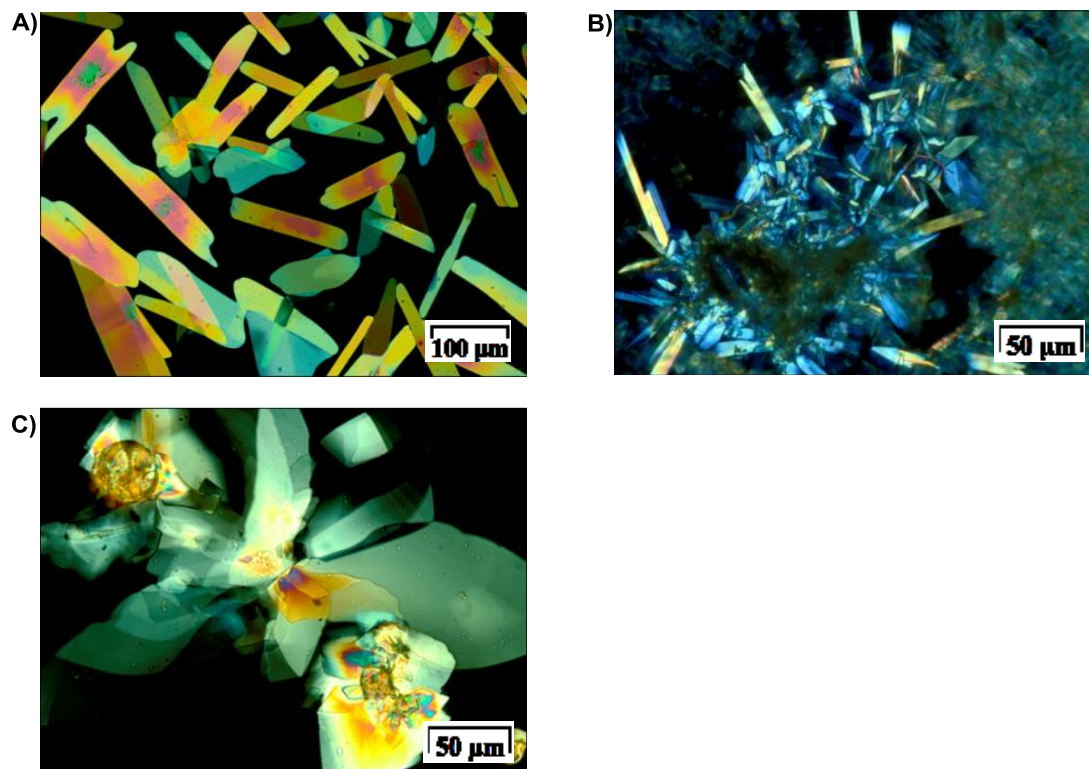

**Fig. S6.** POM images for **1a**, **1b** and **2b**. A) **1a**, at 250 °C upon slow cooling; B) **1b**, at 260 °C upon slow cooling; C) **2b**, at 315 °C upon slow cooling.



### 7. X-ray diffraction (XRD) data of 1a-b, 2a-b, and 3

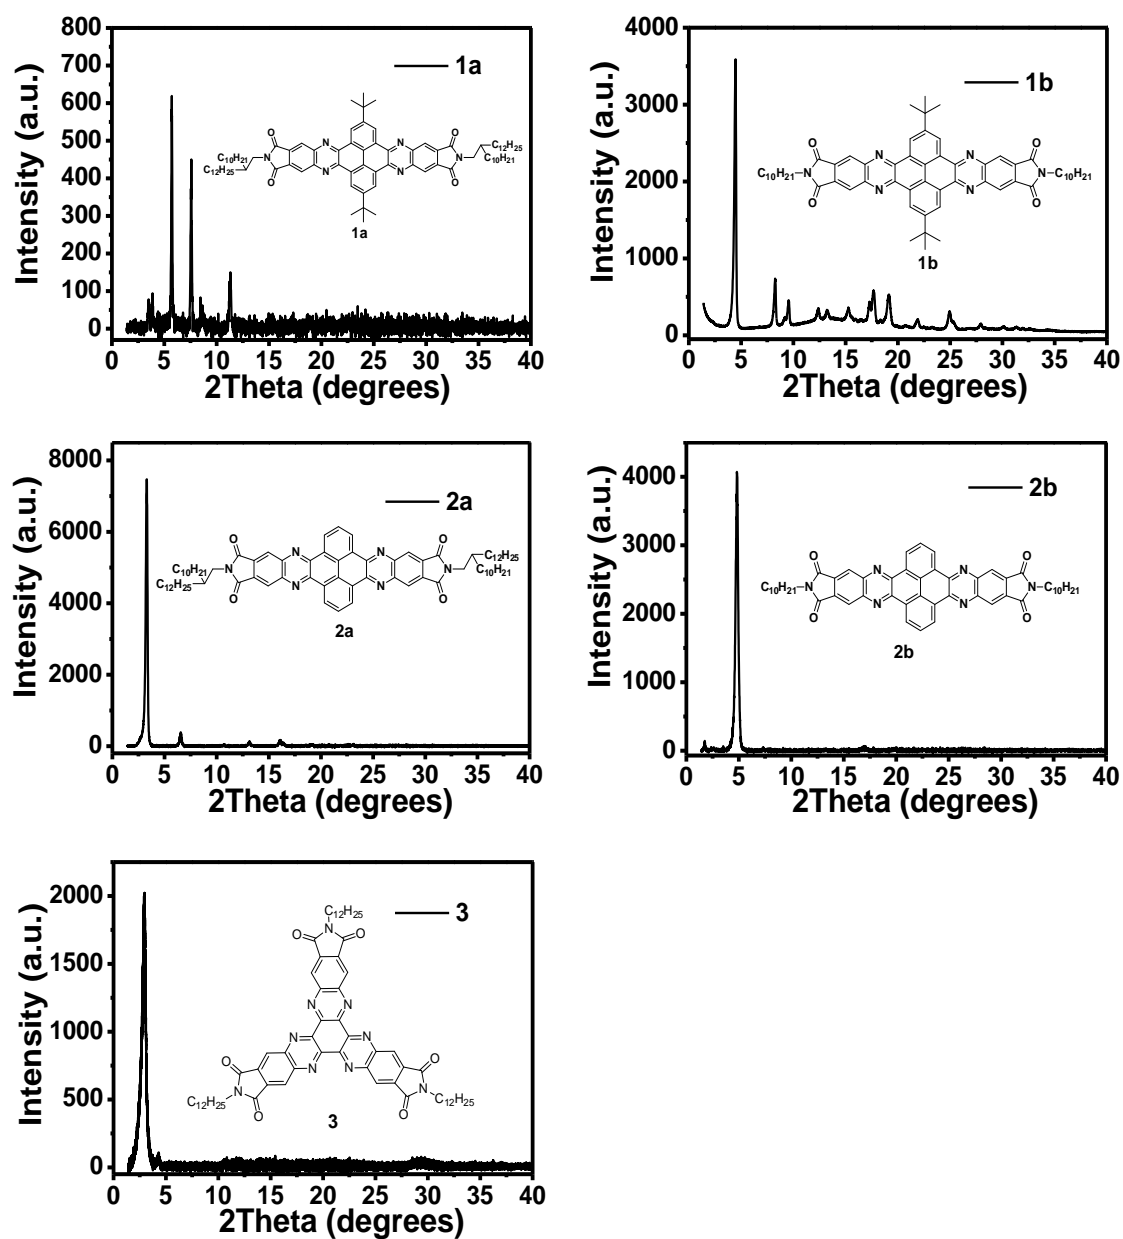

Fig. S7. Powder XRD patterns for 1a-b, 2a-b, and 3 at room temperature

*Electronic Supplementary Information (ESI) for Organic & Biomolecular Chemistry*

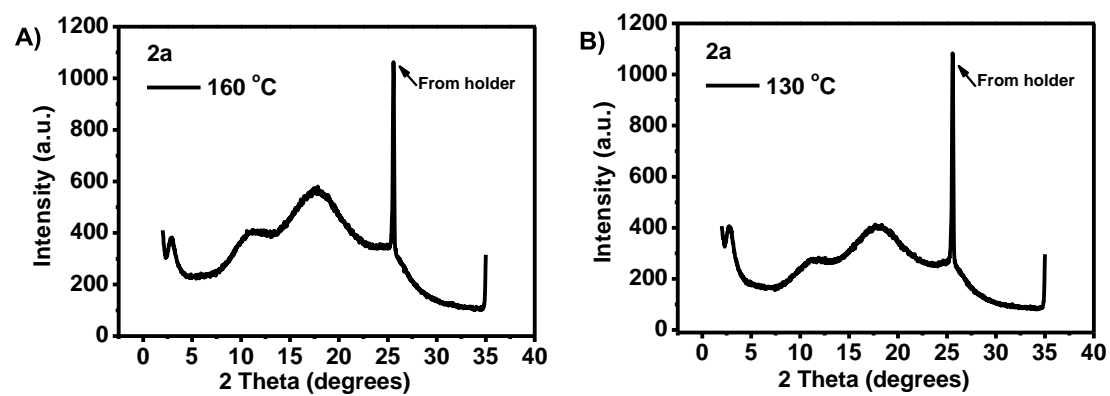

**Fig. S8.** Variable-Temperature Powder XRD (VT-XRD) patterns for **2a** at 160 °C and 130 °C.

8. Additional space-charge limited-current measurements for 1b and 2b.

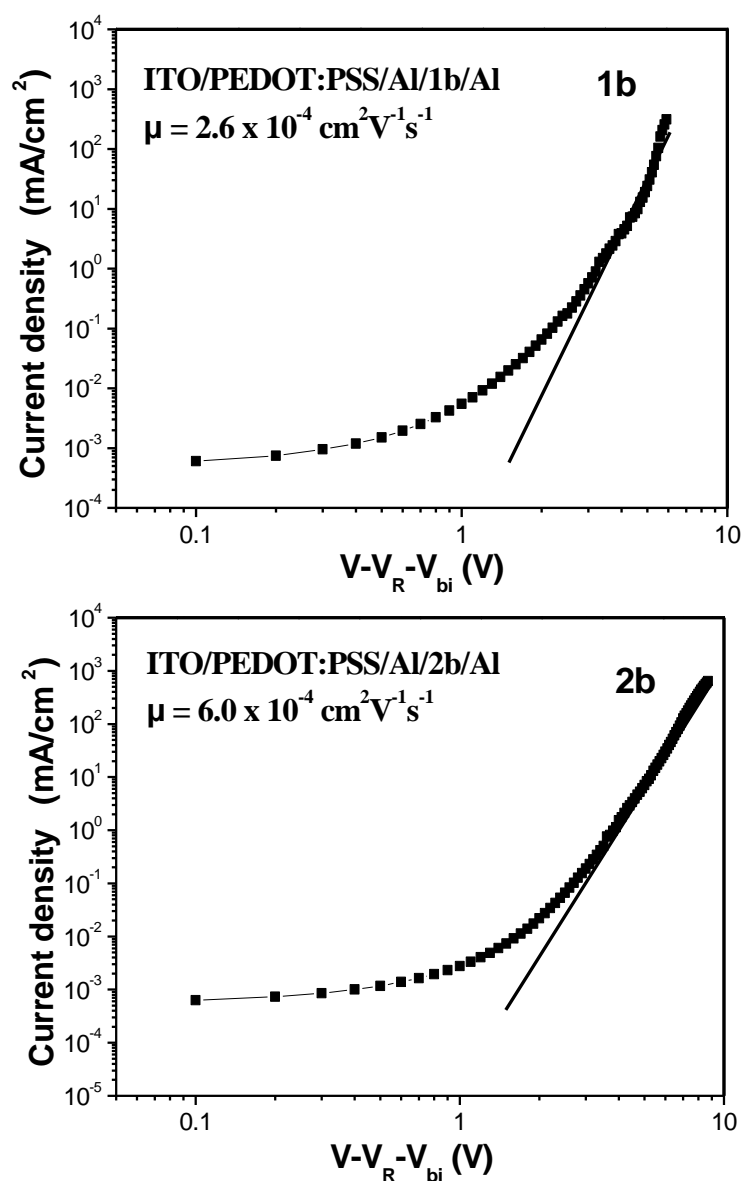

**Fig. S9.** Double logarithmic plot of the current density ( $J$ ) versus applied voltage ( $V$ ) curves for **1b** and **2b**.

Electronic Supplementary Information (ESI) for Organic & Biomolecular Chemistry

### 9. <sup>1</sup>H NMR and <sup>13</sup>C NMR spectra

#### <sup>1</sup>H NMR spectrum of compound 5

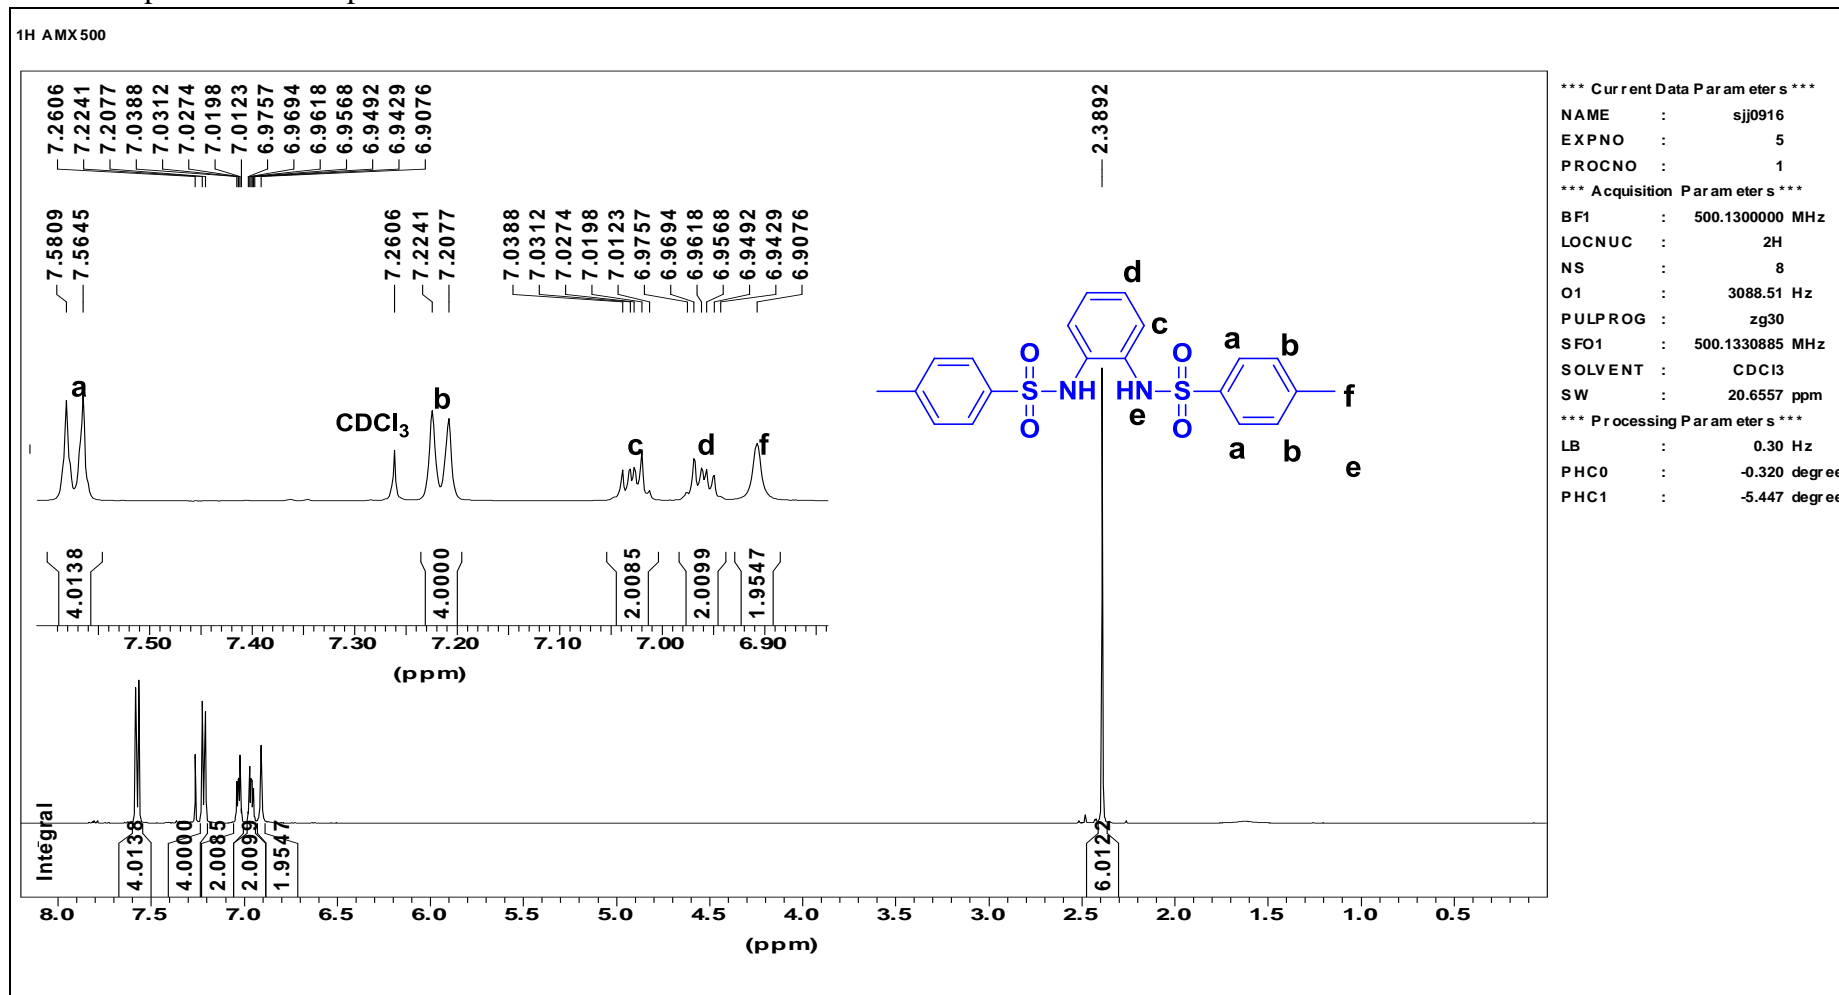

Electronic Supplementary Information (ESI) for Organic & Biomolecular Chemistry

<sup>13</sup>C NMR spectrum of compound 5

<sup>13</sup>C AMX500  
Ph-NHTs

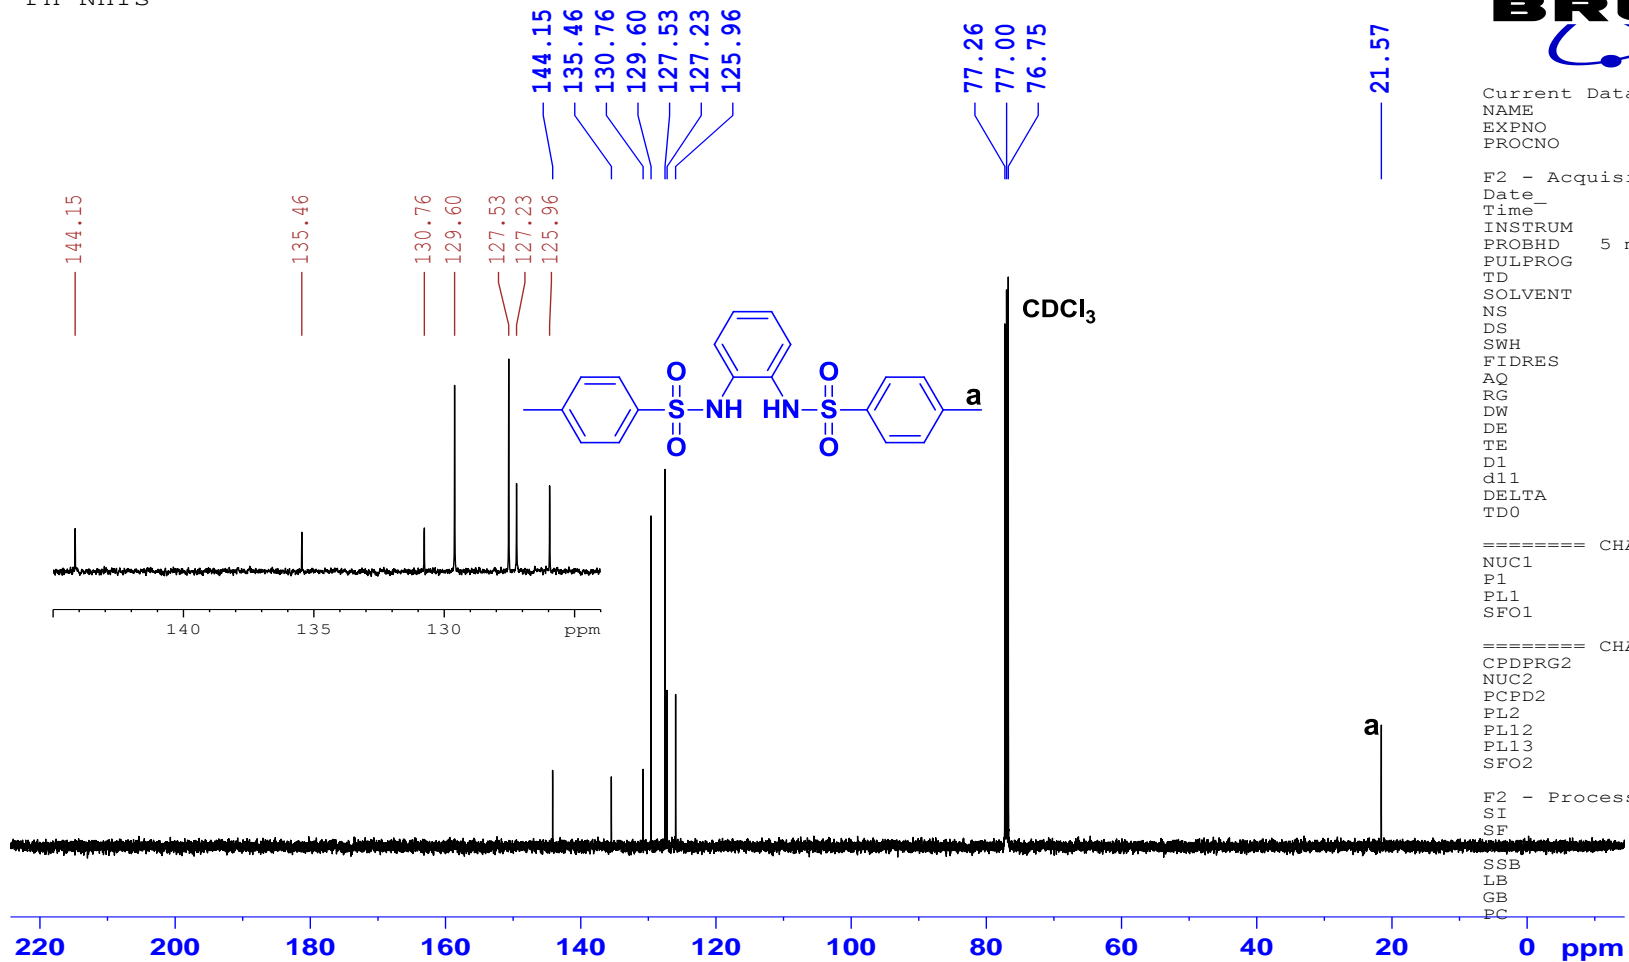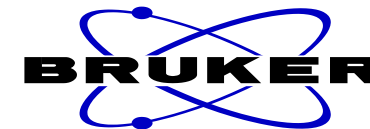

Current Data Parameters  
NAME sjj0305  
EXPNO 2  
PROCNO 1

F2 - Acquisition Parameters  
Date\_ 20120305  
Time\_ 20.30  
INSTRUM spect  
PROBHD 5 mm PABBO BB/  
PULPROG zgpg30  
TD 65536  
SOLVENT CDCl3  
NS 100  
DS 0  
SWH 30030.029 Hz  
FIDRES 0.458222 Hz  
AQ 1.0912410 sec  
RG 16384  
DW 16.650 usec  
DE 6.00 usec  
TE 298.2 K  
D1 2.00000000 sec  
d11 0.03000000 sec  
DELTA 1.89999998 sec  
TD0 1

==== CHANNEL f1 =====  
NUC1 13C  
P1 8.90 usec  
PL1 0.00 dB  
SFO1 125.7709936 MHz

==== CHANNEL f2 =====  
CPDPRG2 waltz16  
NUC2 1H  
PCPD2 80.00 usec  
PL2 1.00 dB  
PL12 15.83 dB  
PL13 15.83 dB  
SFO2 500.1320005 MHz

F2 - Processing parameters  
SI 32768  
SF 125.7577934 MHz  
EM  
SSB 0  
LB 1.00 Hz  
GB 0  
PC 1.40

Electronic Supplementary Information (ESI) for Organic & Biomolecular Chemistry

<sup>1</sup>H NMR spectrum of compound 6

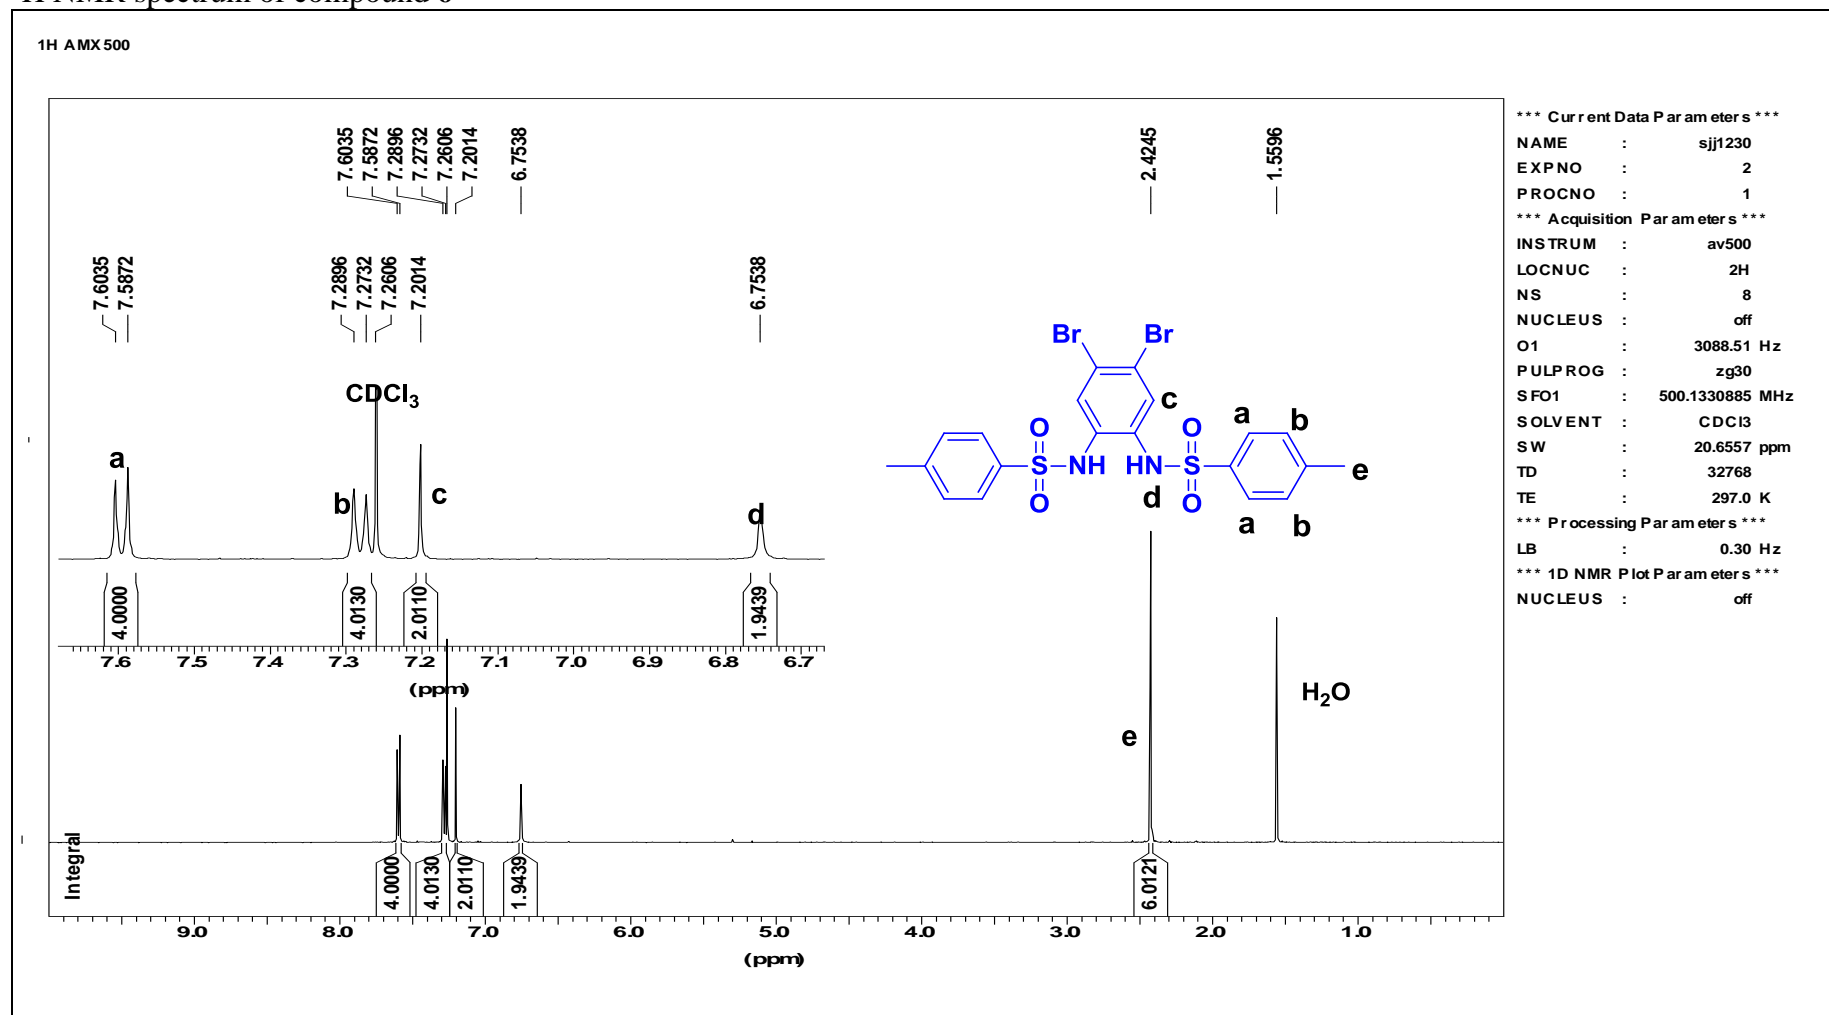

Electronic Supplementary Information (ESI) for Organic & Biomolecular Chemistry

$^{13}\text{C}$  NMR spectrum of compound **6**

$^{13}\text{C}$  AMX500  
2Br-2NHTs

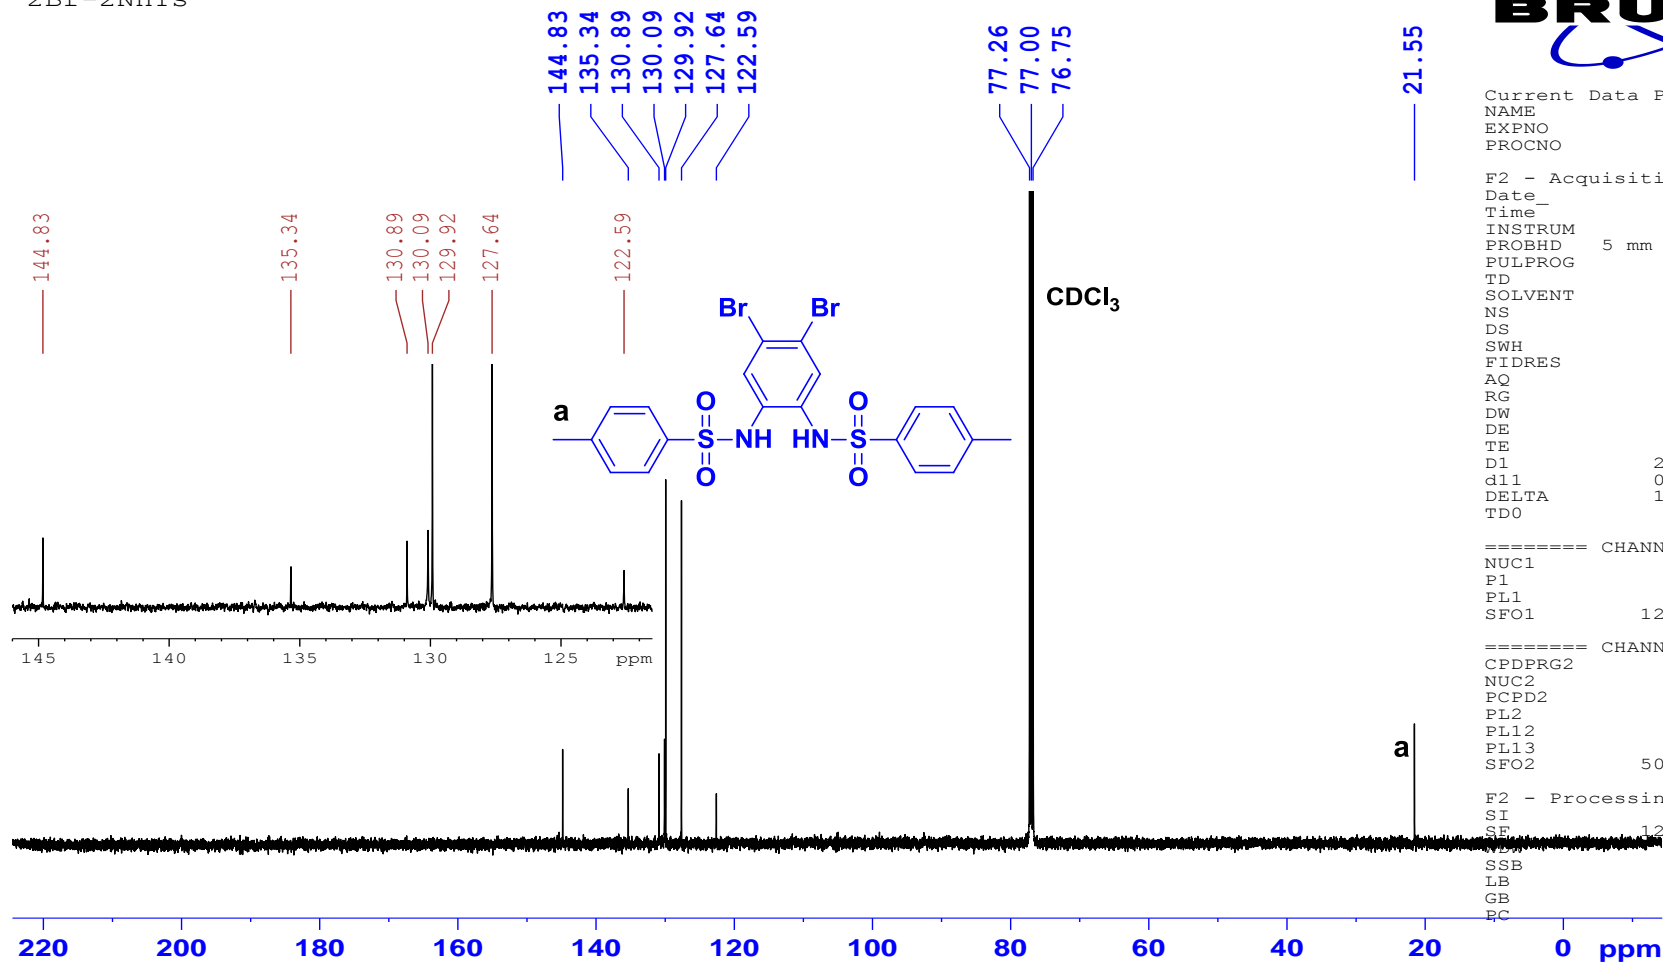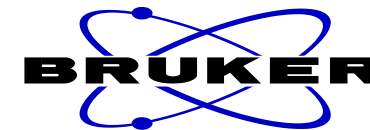

Current Data Parameters  
NAME sjj0305  
EXPNO 10  
PROCNO 1

F2 - Acquisition Parameters  
Date\_ 20120305  
Time\_ 23.11  
INSTRUM spect  
PROBHD 5 mm PABBO BB/  
PULPROG zgpg30  
TD 65536  
SOLVENT CDCl3  
NS 1038  
DS 0  
SWH 30030.029 Hz  
FIDRES 0.458222 Hz  
AQ 1.0912410 sec  
RG 16384  
DW 16.650 usec  
DE 6.00 usec  
TE 322.9 K  
D1 2.00000000 sec  
d11 0.03000000 sec  
DELTA 1.89999998 sec  
TD0 1

==== CHANNEL f1 =====  
NUC1 13C  
P1 8.90 usec  
PL1 0.00 dB  
SFO1 125.7709936 MHz

==== CHANNEL f2 =====  
CPDPRG2 waltz16  
NUC2 1H  
PCPD2 80.00 usec  
PL2 1.00 dB  
PL12 15.83 dB  
PL13 15.83 dB  
SFO2 500.1320005 MHz

F2 - Processing parameters  
SI 32768  
SF 125.7577787 MHz  
AQ 6.5536 sec  
EM  
SSB 0  
LB 1.00 Hz  
GB 0  
PC 1.40

Electronic Supplementary Information (ESI) for Organic & Biomolecular Chemistry

<sup>1</sup>H NMR spectrum of compound 7

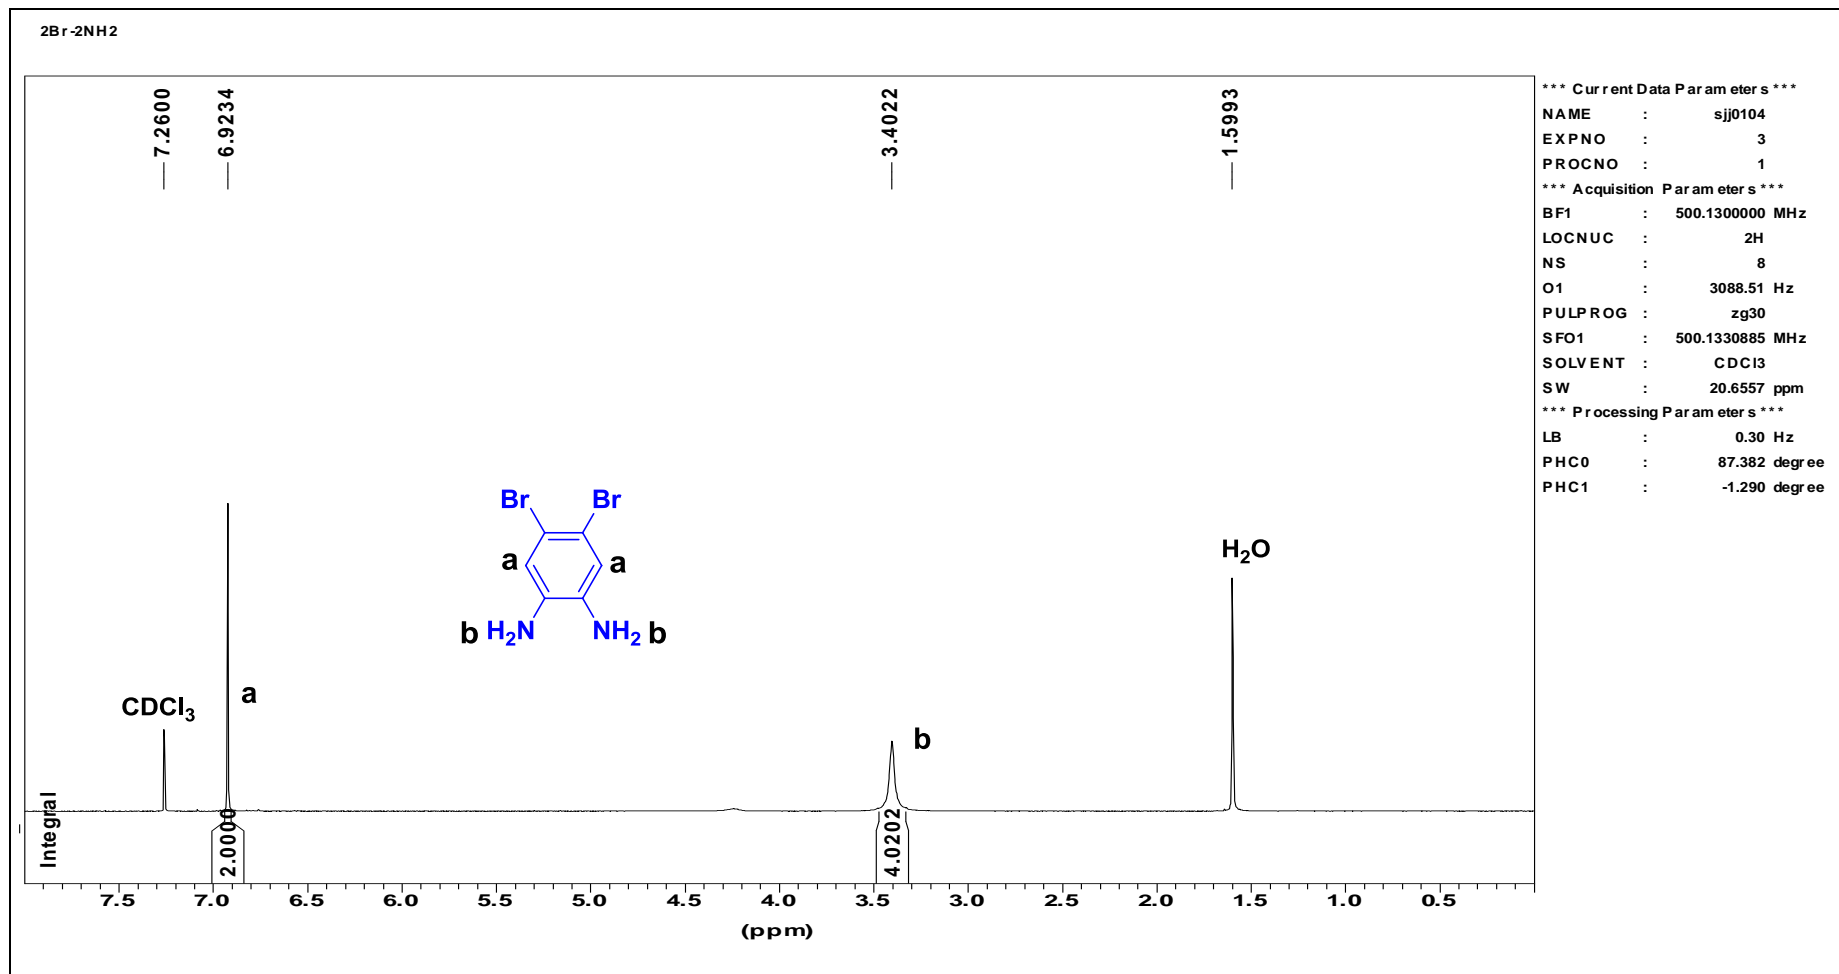



Electronic Supplementary Information (ESI) for Organic & Biomolecular Chemistry

$^{13}\text{C}$  NMR spectrum of compound 7

$^{13}\text{C}$  AMX500  
2Br-2NH<sub>2</sub>

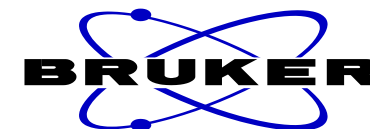

Current Data Parameters  
NAME sjj0305  
EXPNO 11  
PROCNO 1

F2 - Acquisition Parameters  
Date\_ 20120306  
Time\_ 0.12  
INSTRUM spect  
PROBHD 5 mm PABBO BB/  
PULPROG zgpg30  
TD 65536  
SOLVENT CDCl<sub>3</sub>  
NS 168  
DS 0  
SWH 30030.029 Hz  
FIDRES 0.458222 Hz  
AQ 1.0912410 sec  
RG 16384  
DW 16.650 usec  
DE 6.00 usec  
TE 324.8 K  
D1 2.00000000 sec  
d11 0.03000000 sec  
DELTA 1.89999998 sec  
TD0 1

==== CHANNEL f1 =====  
NUC1 13C  
P1 8.90 usec  
PL1 0.00 dB  
SFO1 125.7709936 MHz

==== CHANNEL f2 =====  
CPDPRG2 waltz16  
NUC2 1H  
PCPD2 80.00 usec  
PL2 1.00 dB  
PL12 15.83 dB  
PL13 15.83 dB  
SFO2 500.1320005 MHz

F2 - Processing parameters  
SI 32768  
SF 125.7577824 MHz  
WDW EM  
SSB 0  
LB 1.00 Hz  
GB 0  
PC 1.40

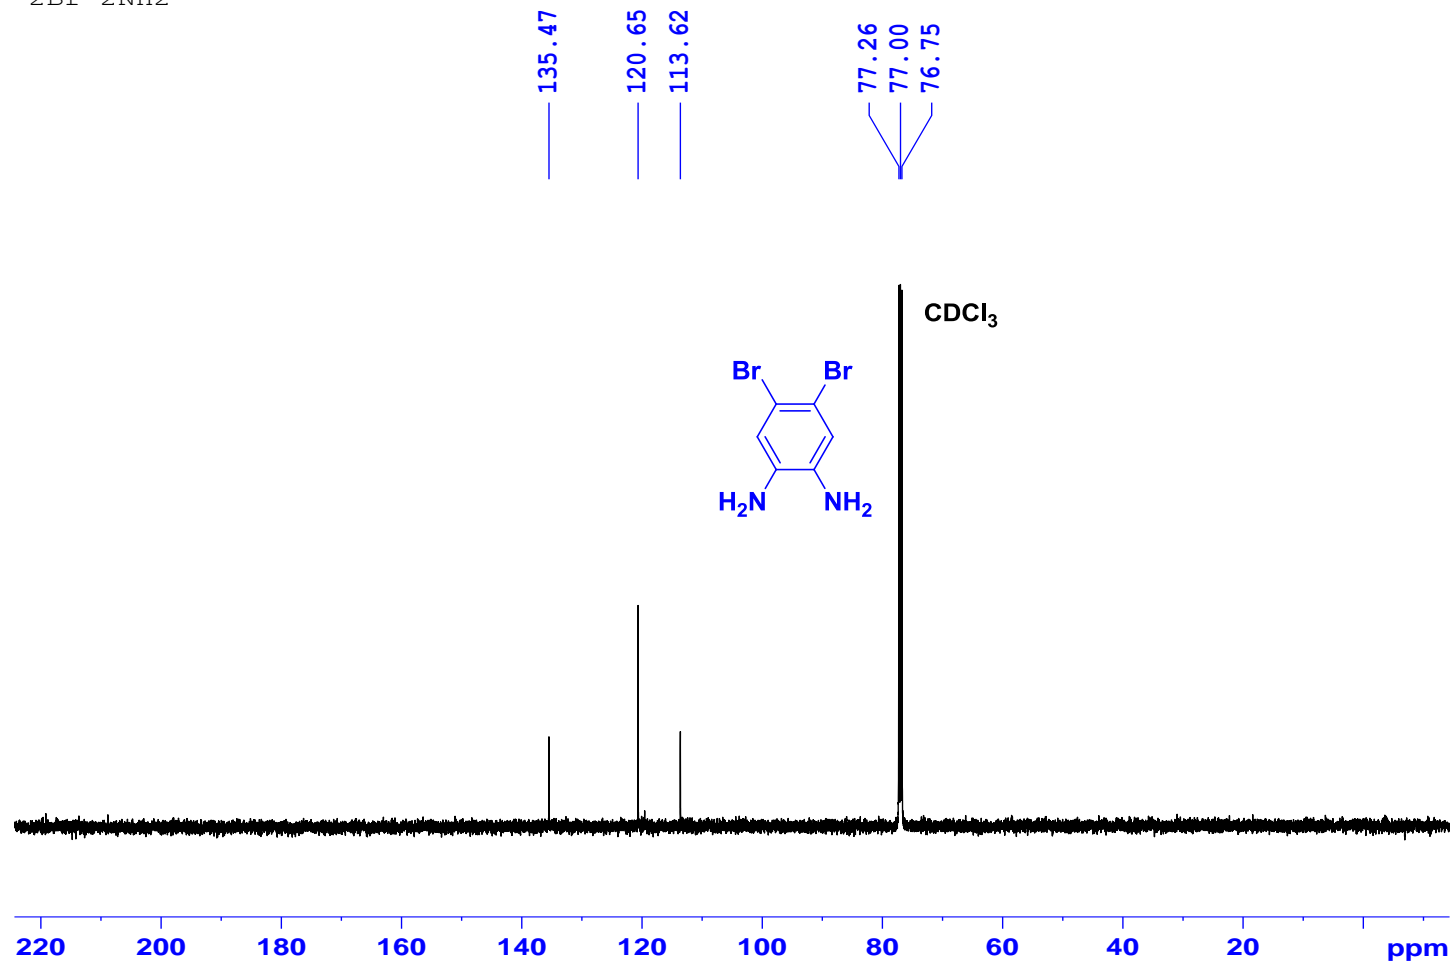

Electronic Supplementary Information (ESI) for Organic & Biomolecular Chemistry

<sup>1</sup>H NMR spectrum of compound **8**

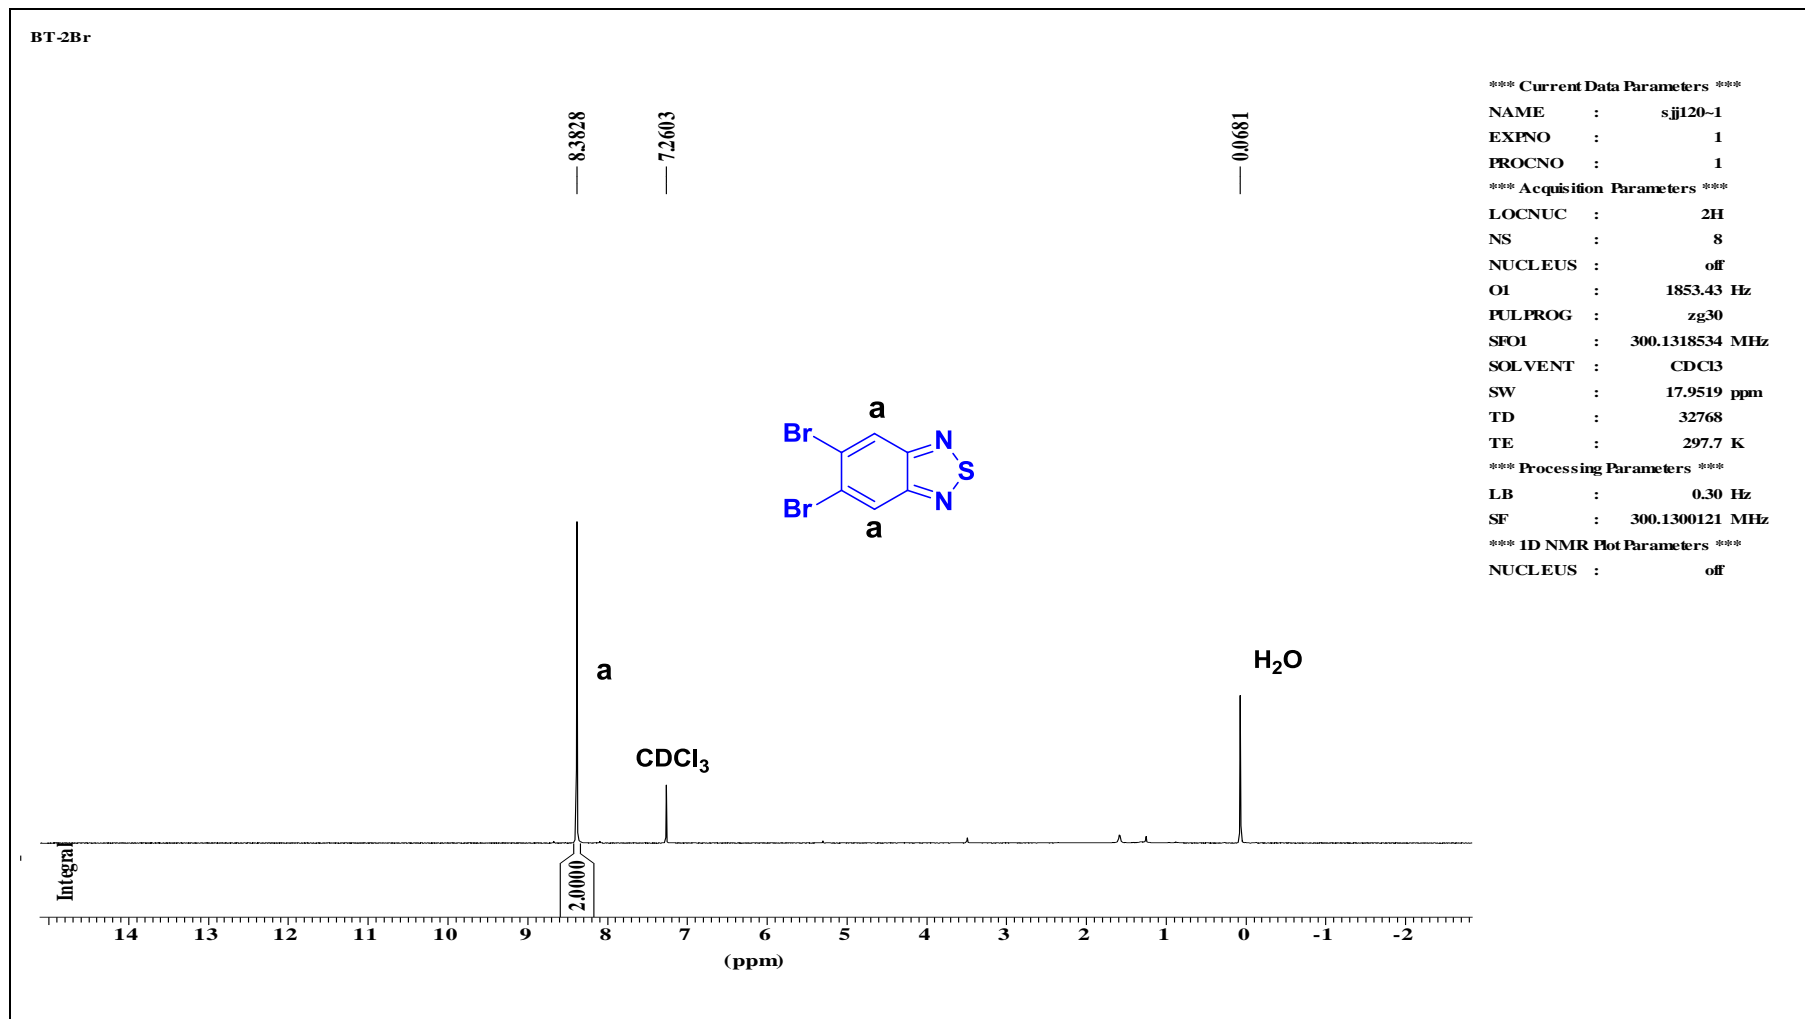

Electronic Supplementary Information (ESI) for Organic & Biomolecular Chemistry

<sup>13</sup>C NMR spectrum of compound **8**

<sup>13</sup>C AMX500  
2Br-BT

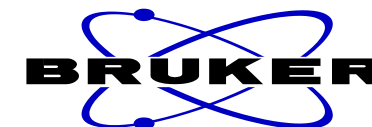

```
Current Data Parameters
NAME          sjj0305
EXPNO         12
PROCNO        1

F2 - Acquisition Parameters
Date_         20120306
Time_         0.22
INSTRUM       spect
PROBHD        5 mm PABBO BB/
PULPROG       zgpg30
TD            65536
SOLVENT       CDCl3
NS            40
DS            0
SWH           30030.029 Hz
FIDRES        0.458222 Hz
AQ            1.0912410 sec
RG            16384
DW            16.650 usec
DE            6.00 usec
TE            323.9 K
D1            2.00000000 sec
d11           0.03000000 sec
DELTA         1.89999998 sec
TD0           1
```

```
===== CHANNEL f1 =====
NUC1          13C
P1            8.90 usec
PL1           0.00 dB
SFO1          125.7709936 MHz
```

```
===== CHANNEL f2 =====
CPDPRG2       waltz16
NUC2          1H
PCPD2         80.00 usec
PL2           1.00 dB
PL12          15.83 dB
PL13          15.83 dB
SFO2          500.1320005 MHz
```

```
F2 - Processing parameters
SI            32768
SF            125.7577870 MHz
WDW           EM
SSB           0
LB            1.00 Hz
GB            0
PC            1.40
```

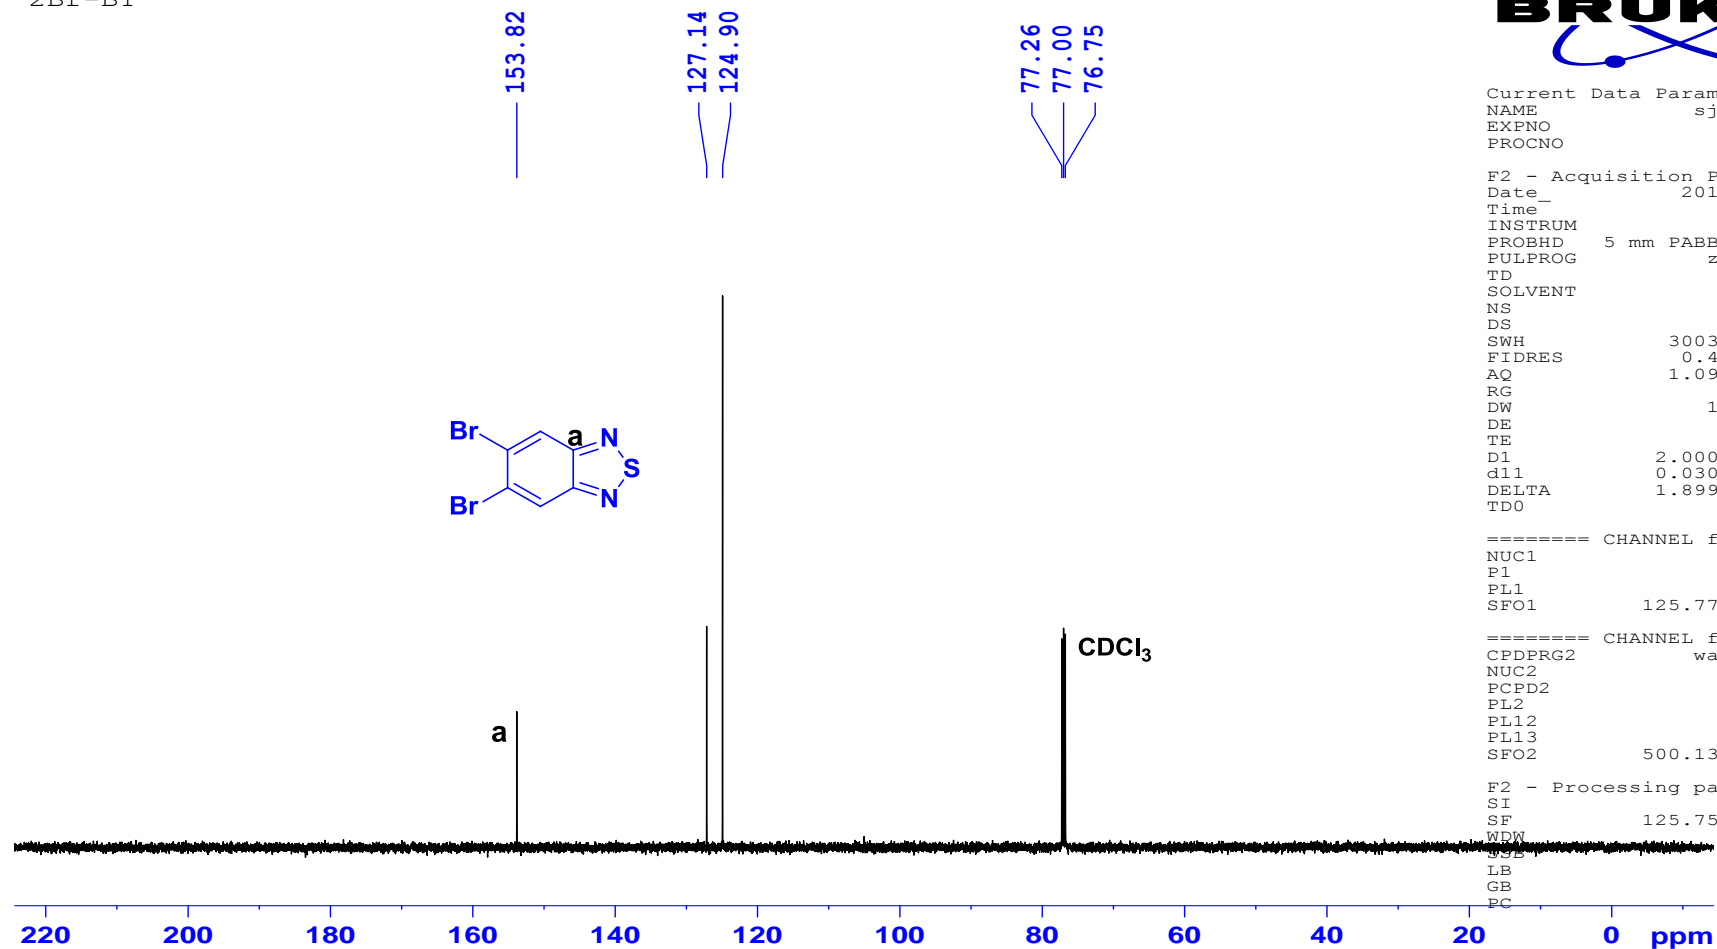

Electronic Supplementary Information (ESI) for Organic & Biomolecular Chemistry

<sup>1</sup>H NMR spectrum of compound **9**

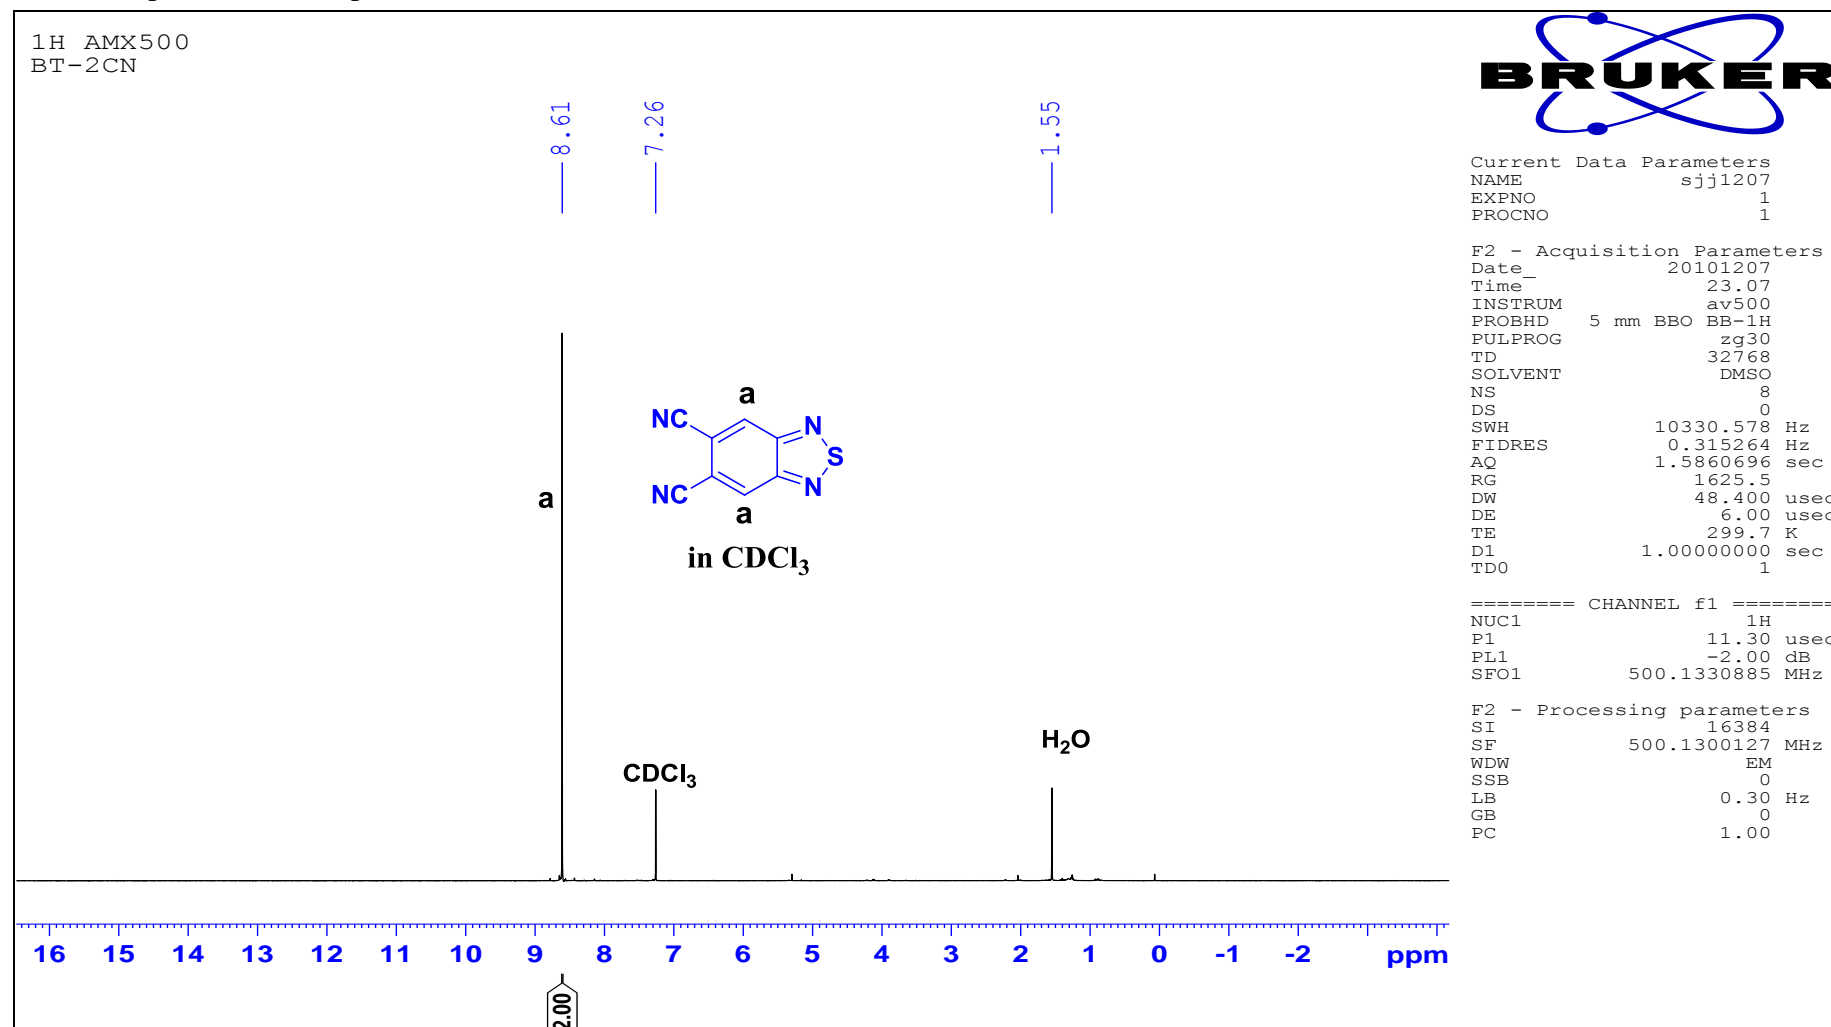

Electronic Supplementary Information (ESI) for Organic & Biomolecular Chemistry

$^{13}\text{C}$  NMR spectrum of compound **9**

$^{13}\text{C}$  AMX500



Current Data Parameters  
NAME sjj0308  
EXPNO 3  
PROCNO 1

F2 - Acquisition Parameters  
Date\_ 20120308  
Time\_ 23.14  
INSTRUM spect  
PROBHD 5 mm PABBO BB/  
PULPROG zgpg30  
TD 65536  
SOLVENT CDCl3  
NS 50  
DS 0  
SWH 30030.029 Hz  
FIDRES 0.458222 Hz  
AQ 1.0912410 sec  
RG 16384  
DW 16.650 usec  
DE 6.00 usec  
TE 298.0 K  
D1 2.00000000 sec  
d11 0.03000000 sec  
DELTA 1.89999998 sec  
TD0 1

==== CHANNEL f1 =====  
NUC1 13C  
P1 8.90 usec  
PL1 0.00 dB  
SFO1 125.7709936 MHz

==== CHANNEL f2 =====  
CPDPRG2 waltz16  
NUC2 1H  
PCPD2 80.00 usec  
PL2 1.00 dB  
PL12 15.83 dB  
PL13 15.83 dB  
SFO2 500.1320005 MHz

F2 - Processing parameters  
SF 32768  
SF 125.7577943 MHz  
WDW EM  
SSB 0  
LB 1.00 Hz  
GB 0  
BC 1.40

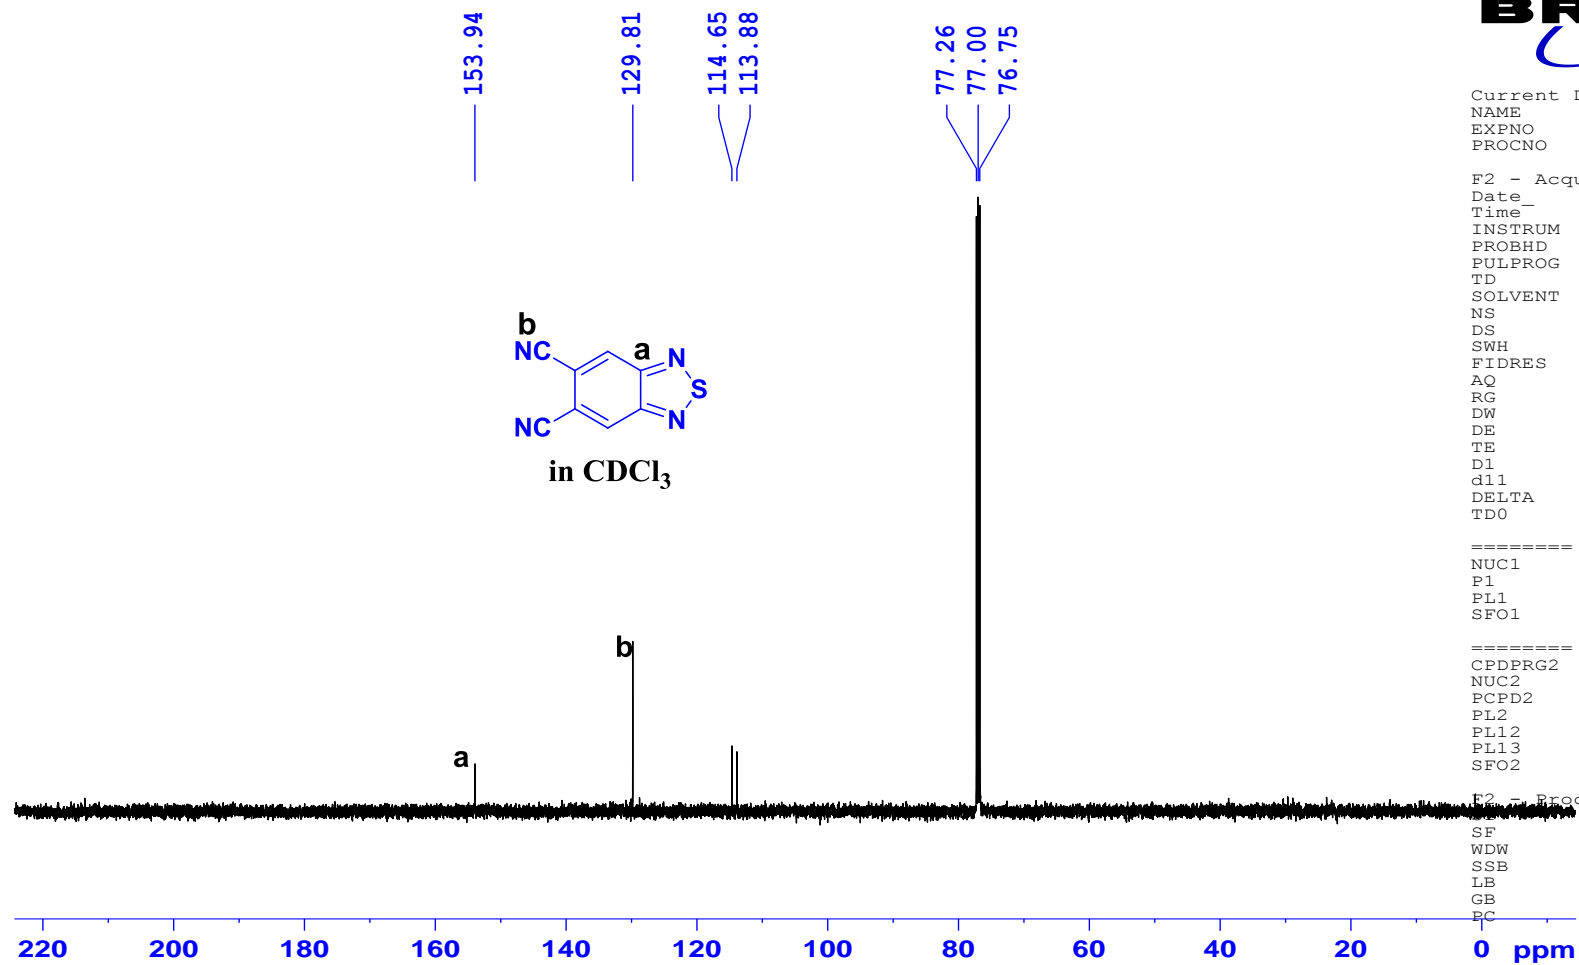

Electronic Supplementary Information (ESI) for Organic & Biomolecular Chemistry

<sup>1</sup>H NMR spectrum of compound **10**

<sup>1</sup>H normal range AC300  
BT-imide

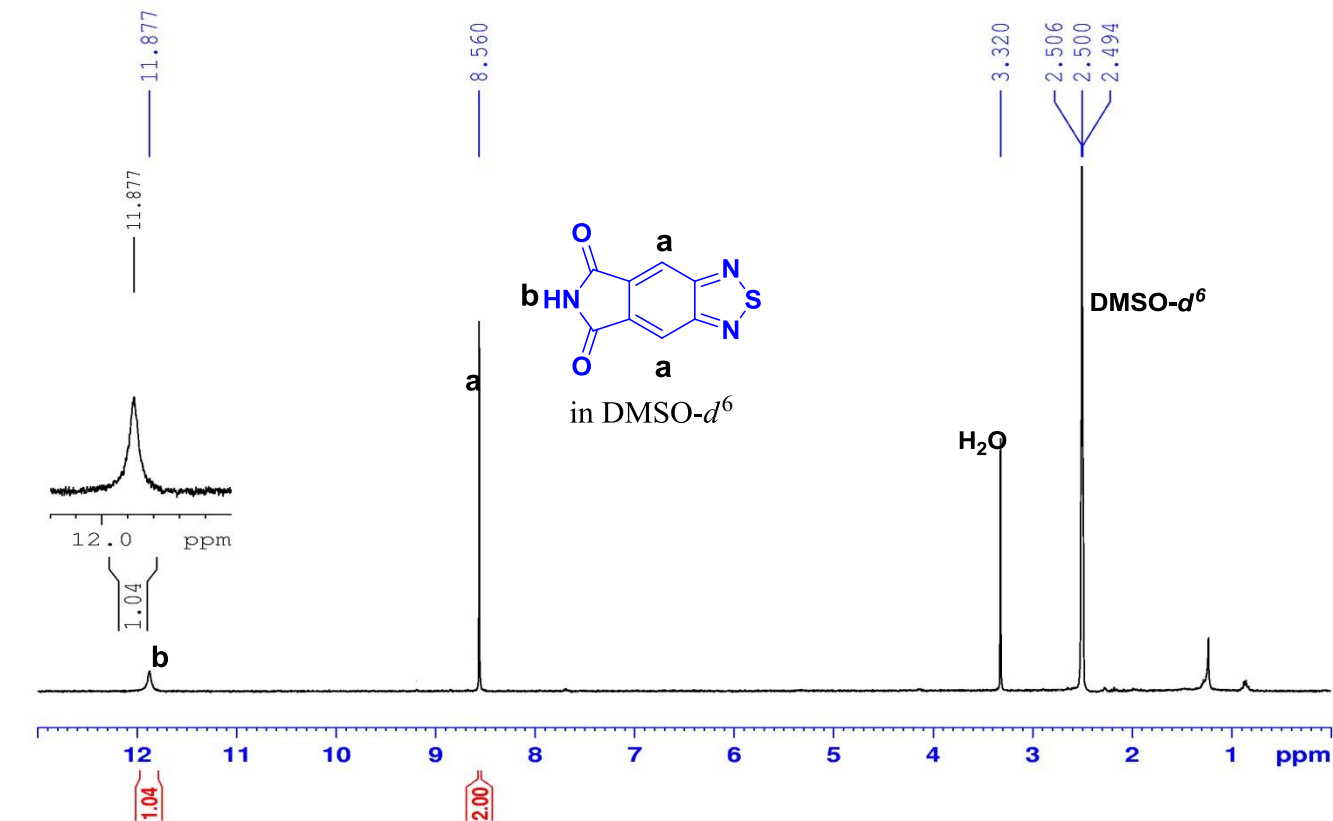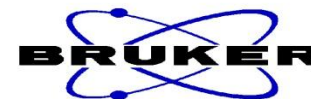

Current Data Parameters  
NAME sjj1211 300  
EXPNO 1  
PROCNO 1

F2 - Acquisition Parameters  
Date\_ 20101211  
Time 21.28  
INSTRUM spect  
PROBHD 5 mm QNP 1H/13  
PULPROG zg30  
TD 32768  
SOLVENT DMSO  
NS 8  
DS 0  
SWH 5387.931 Hz  
FIDRES 0.164427 Hz  
AQ 3.0410132 sec  
RG 1448.2  
DW 92.800 usec  
DE 6.00 usec  
TE 297.5 K  
D1 1.00000000 sec  
TDO 1

----- CHANNEL f1 -----  
NUC1 1H  
P1 11.00 usec  
PL1 0.00 dB  
SFO1 300.1318534 MHz

F2 - Processing parameters  
SI 32768  
SF 300.1300010 MHz  
WDW EM  
SSB 0  
LB 0.30 Hz  
GB 0  
PC 1.00

Electronic Supplementary Information (ESI) for Organic & Biomolecular Chemistry

$^{13}\text{C}$  NMR spectrum of compound **10**

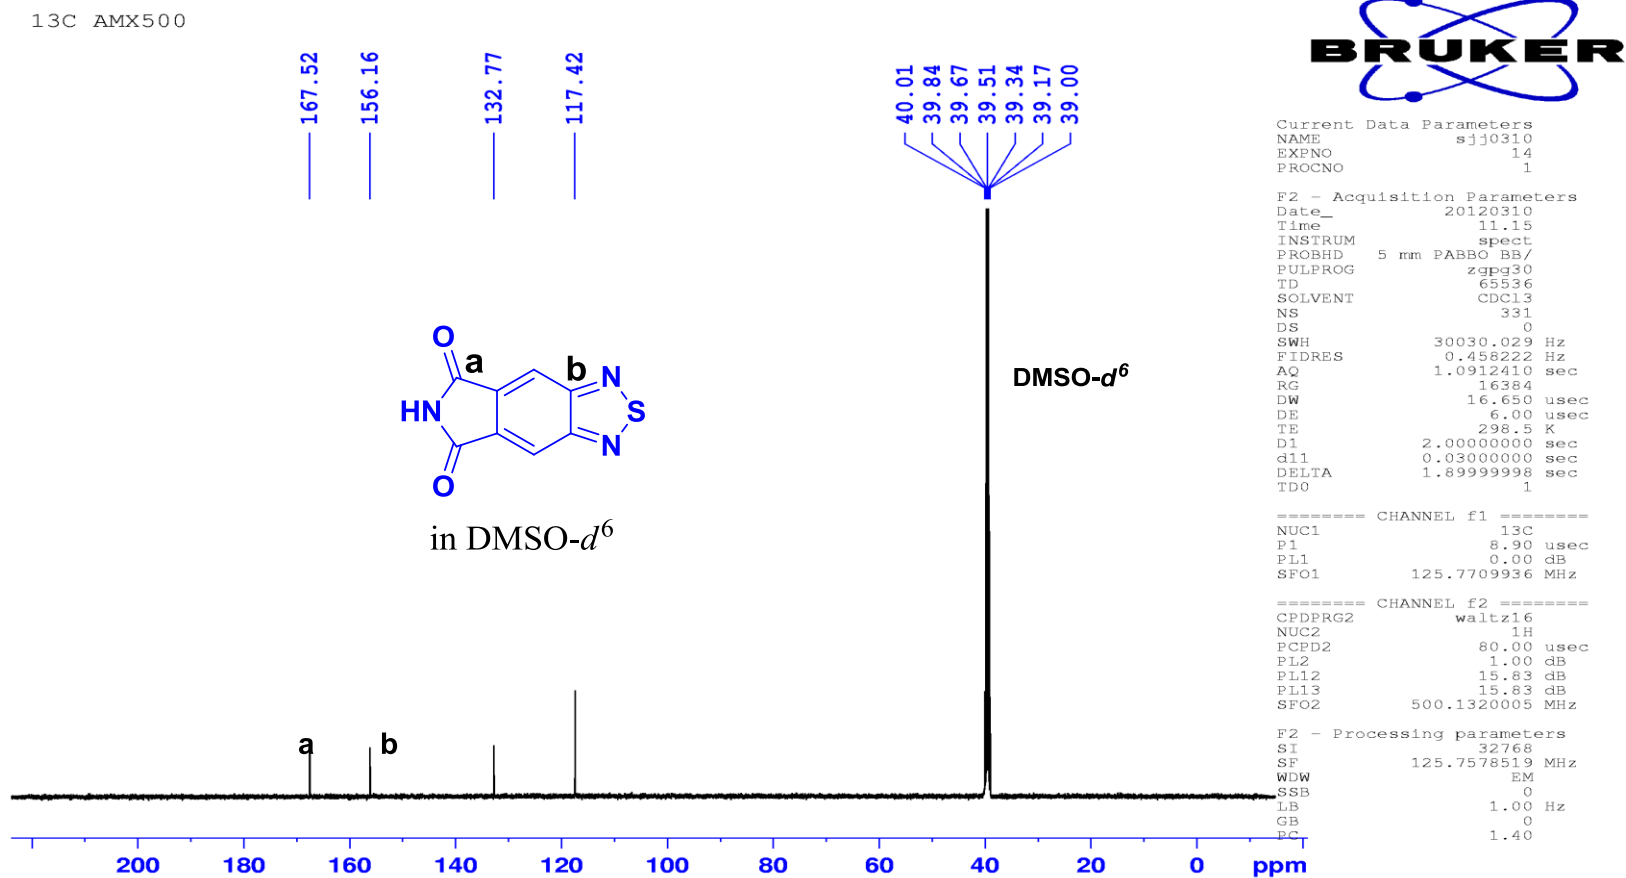

Electronic Supplementary Information (ESI) for Organic & Biomolecular Chemistry

<sup>1</sup>H NMR spectrum of compound **11a**

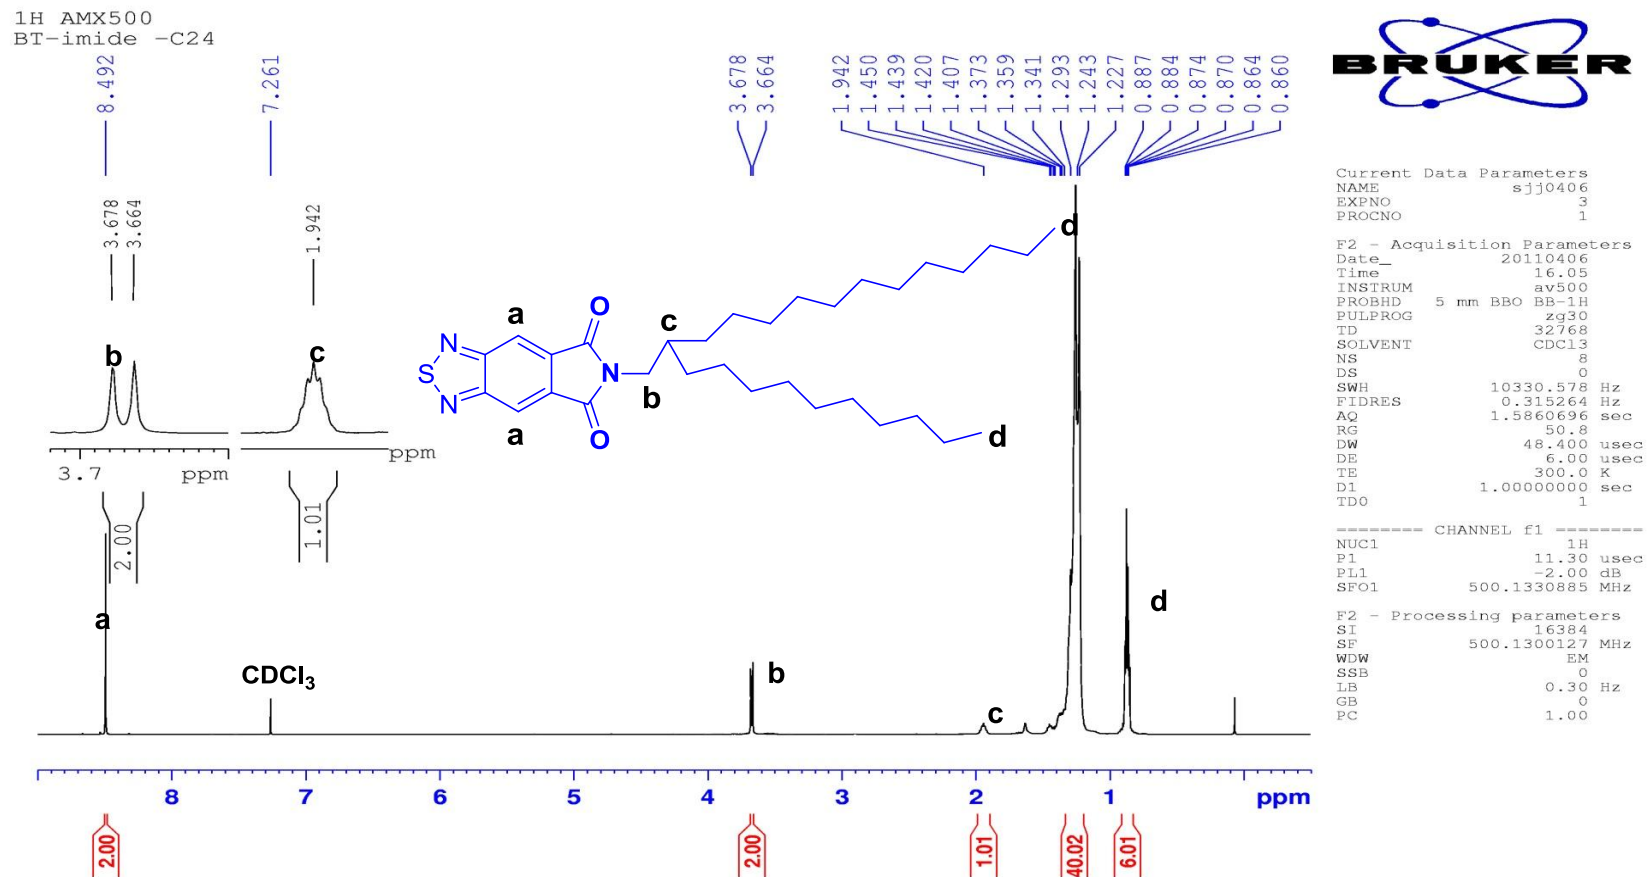



Electronic Supplementary Information (ESI) for Organic & Biomolecular Chemistry

$^{13}\text{C}$  NMR spectrum of compound **11a**

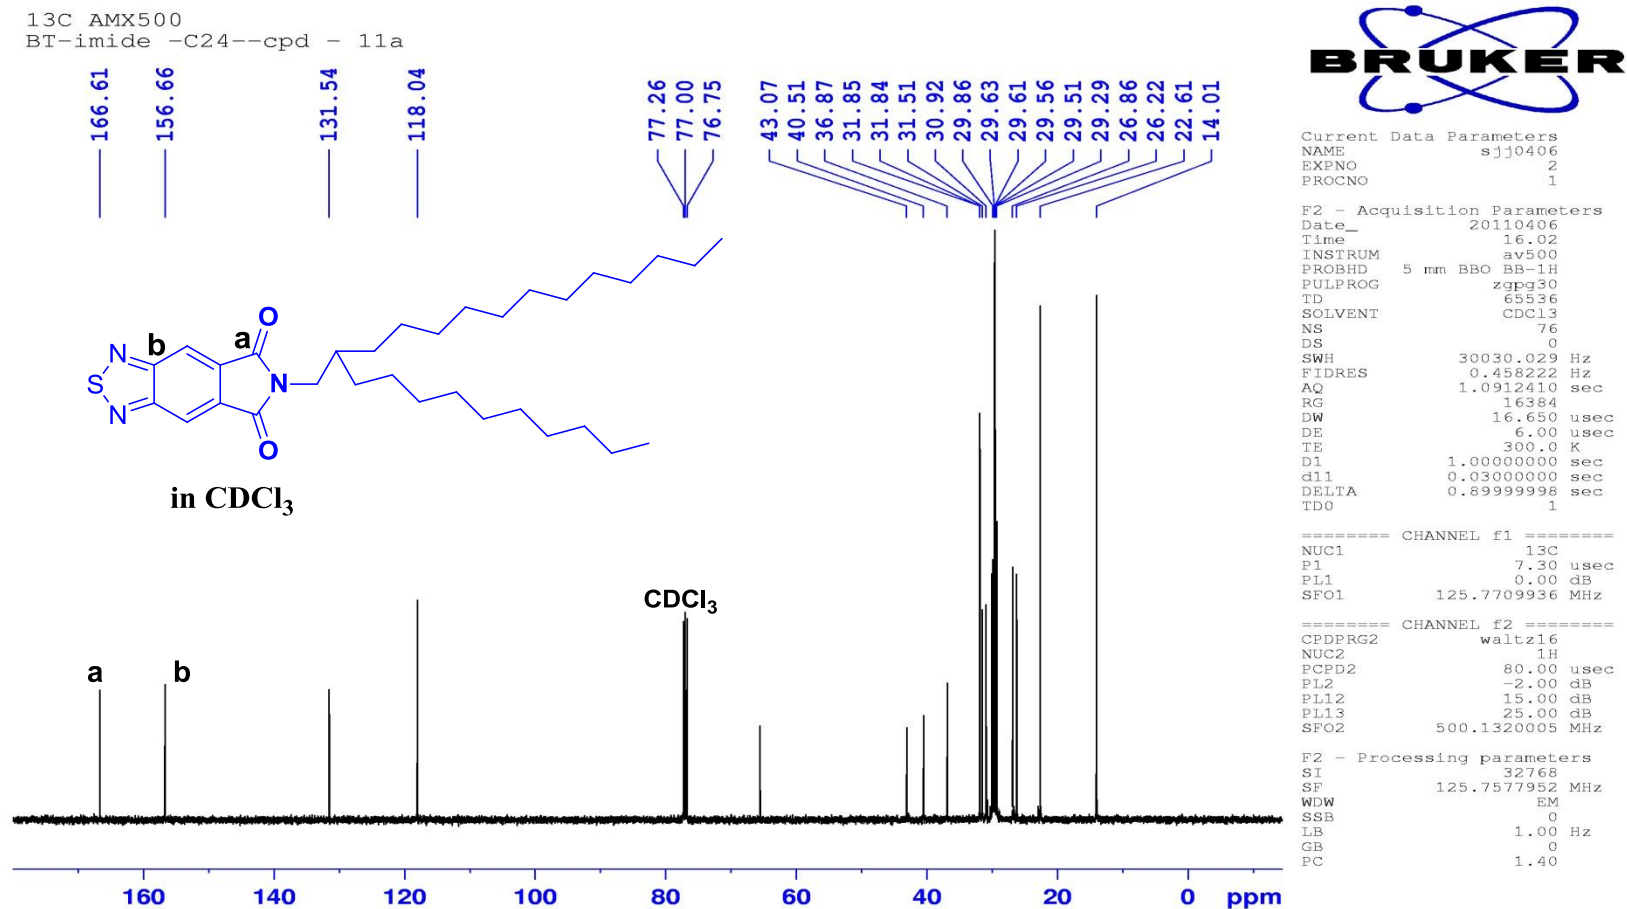

Electronic Supplementary Information (ESI) for Organic & Biomolecular Chemistry

<sup>1</sup>H NMR spectrum of compound **11b**

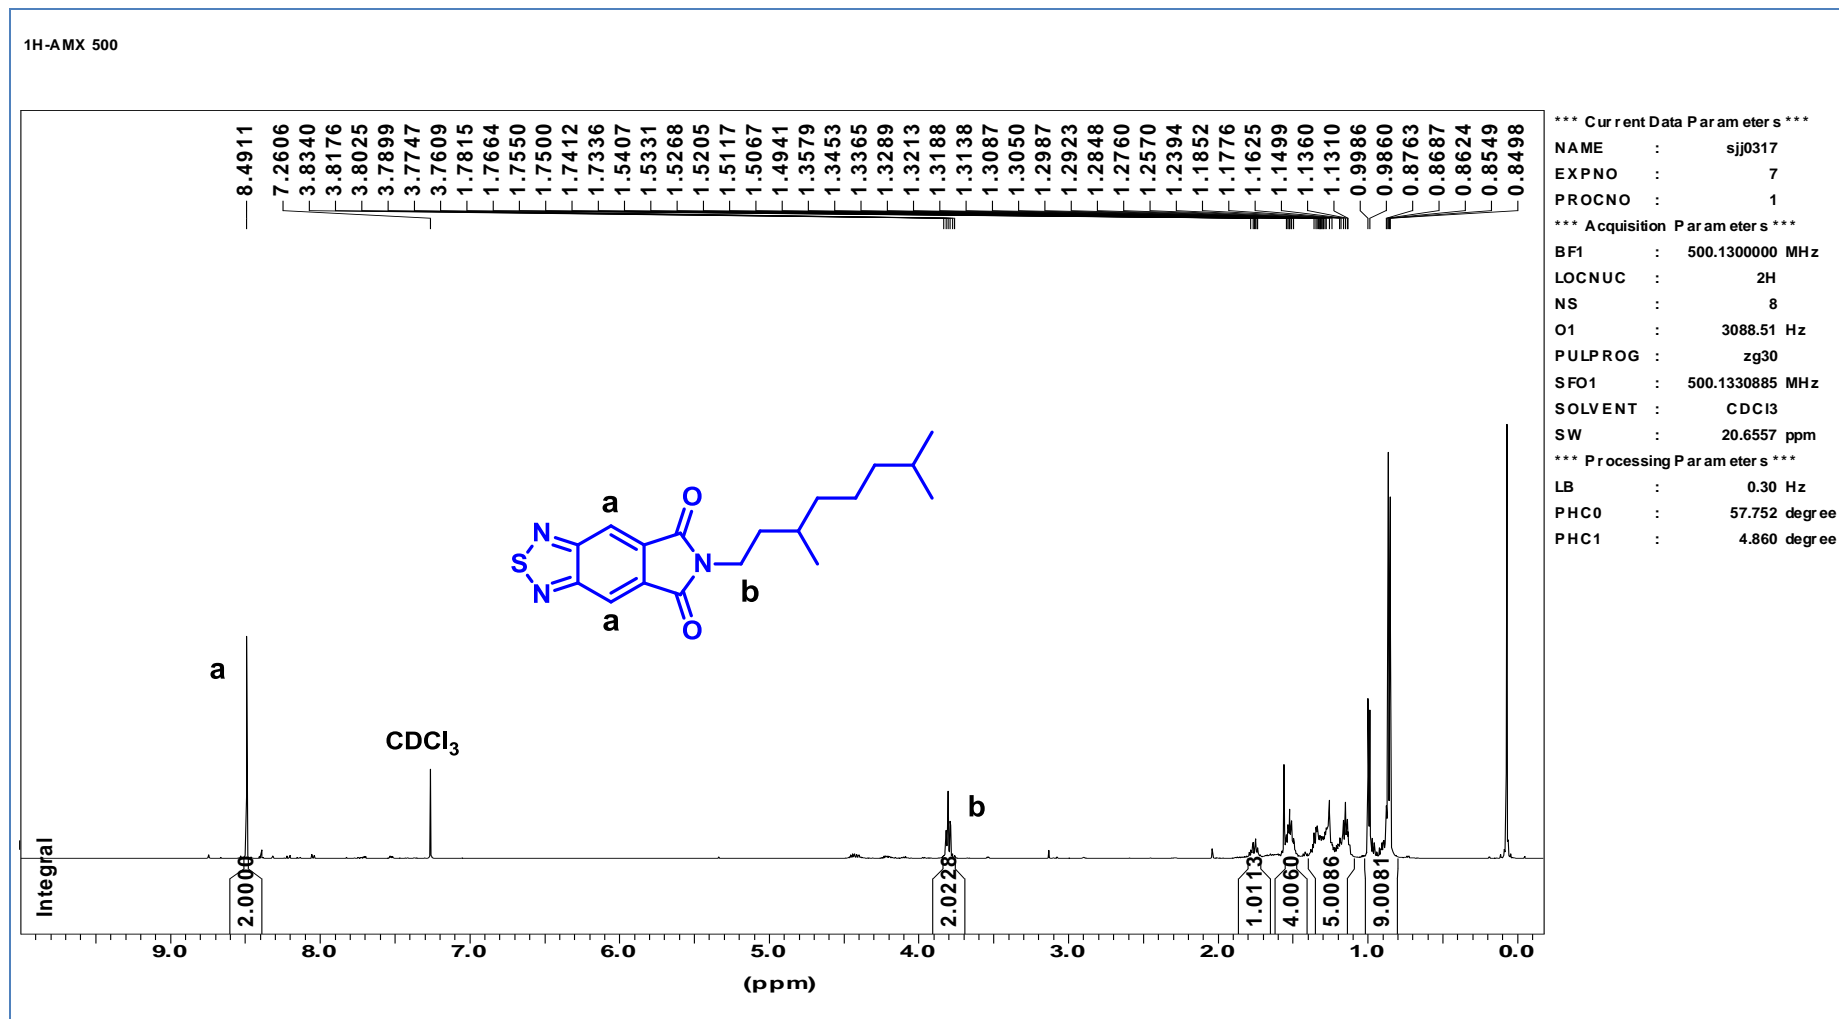

Electronic Supplementary Information (ESI) for Organic & Biomolecular Chemistry

<sup>13</sup>C NMR spectrum of compound **11b**

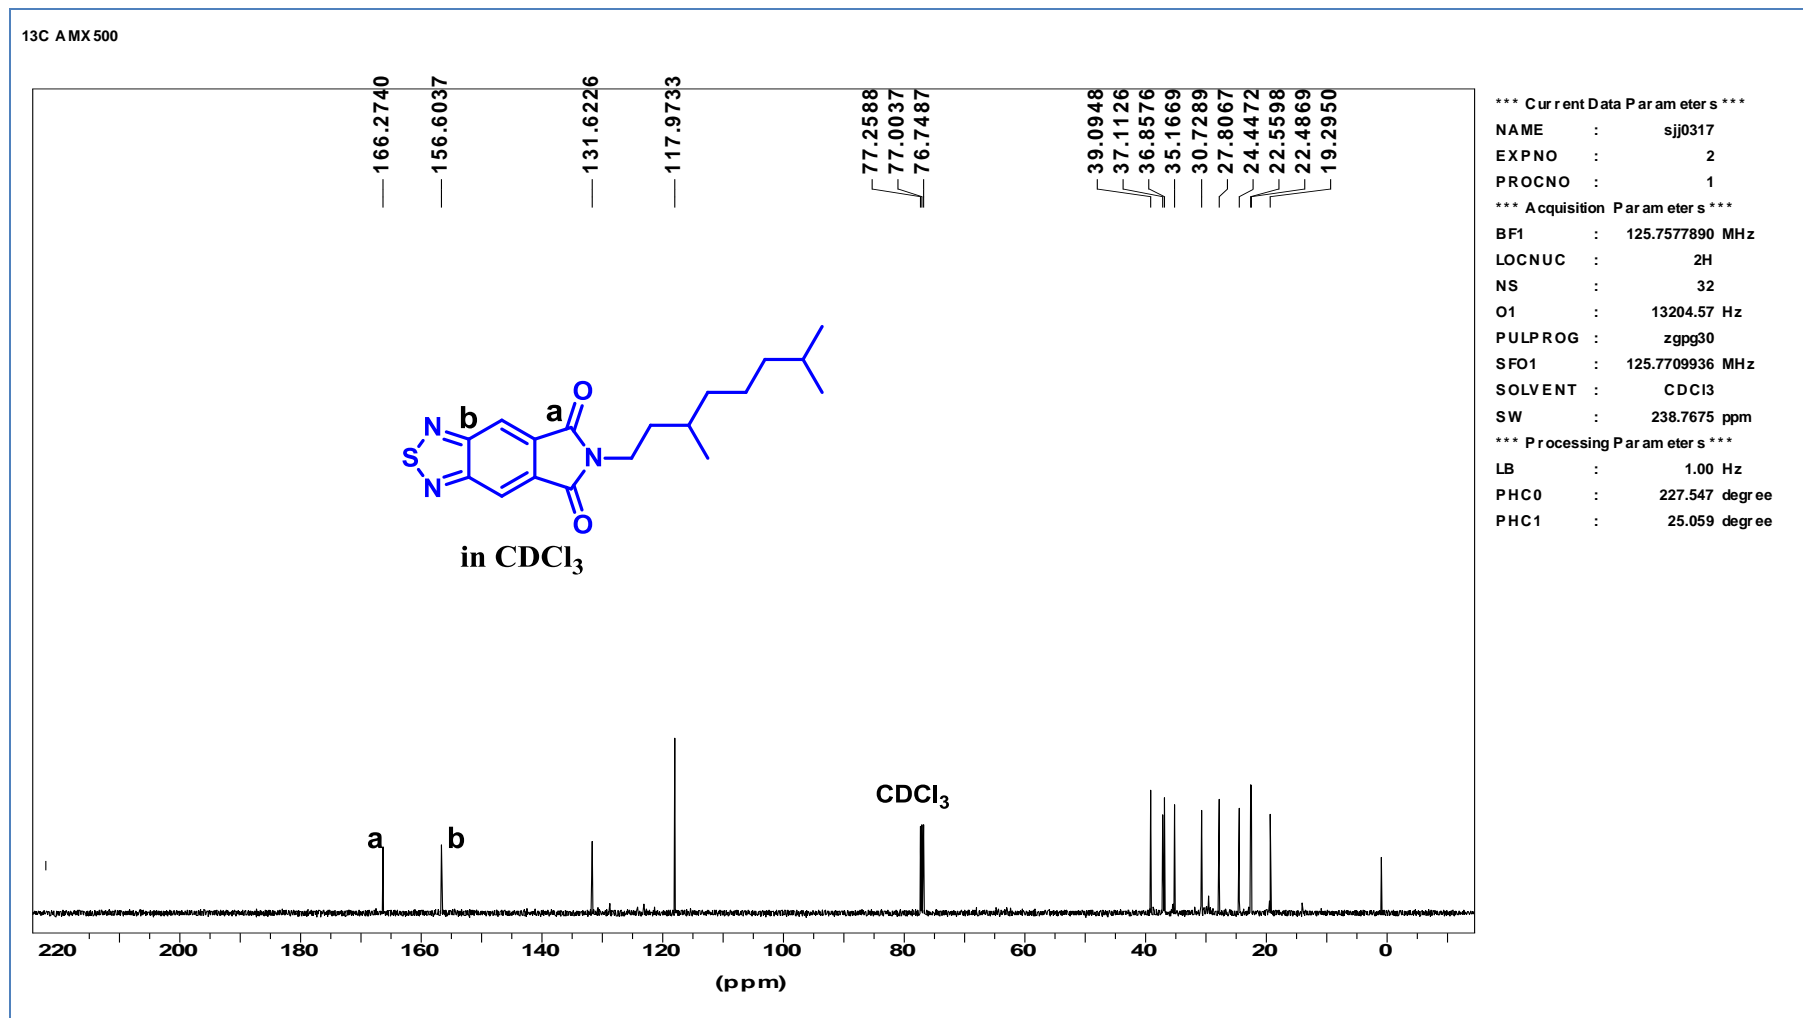

Electronic Supplementary Information (ESI) for Organic & Biomolecular Chemistry

<sup>1</sup>H NMR spectrum of compound **11c**

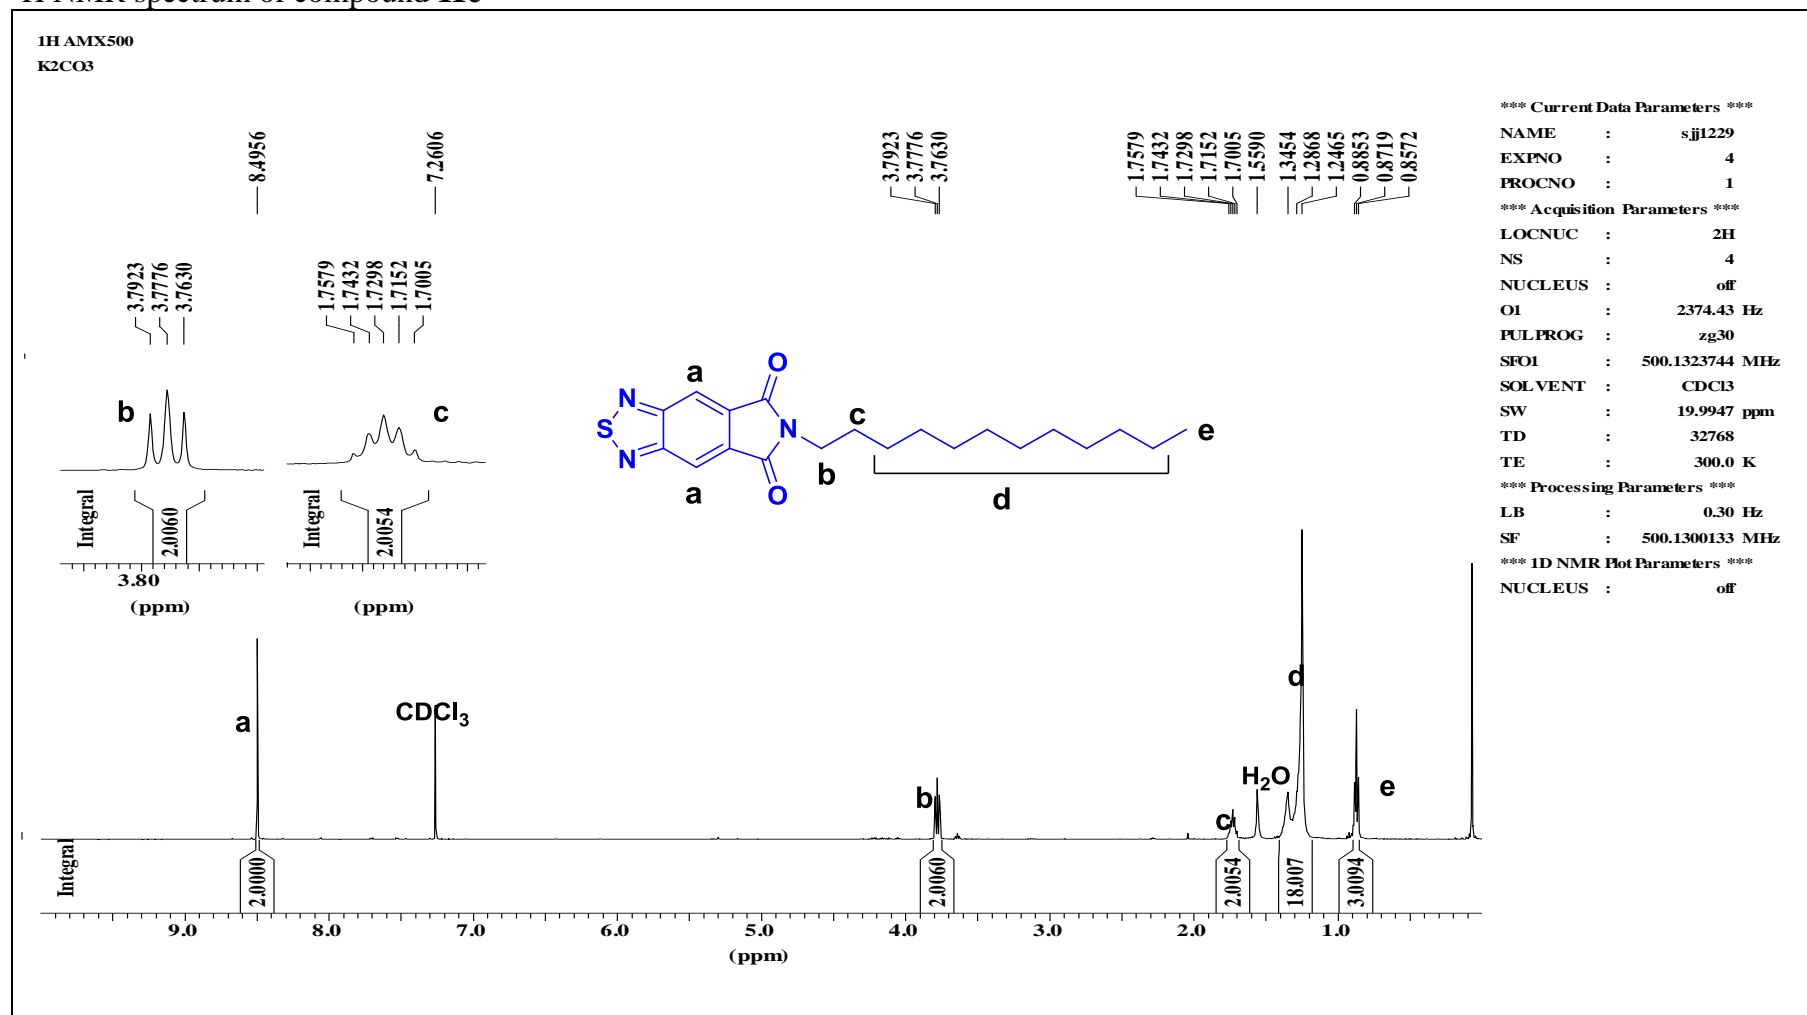

Electronic Supplementary Information (ESI) for Organic & Biomolecular Chemistry

<sup>13</sup>C NMR spectrum of compound **11c**

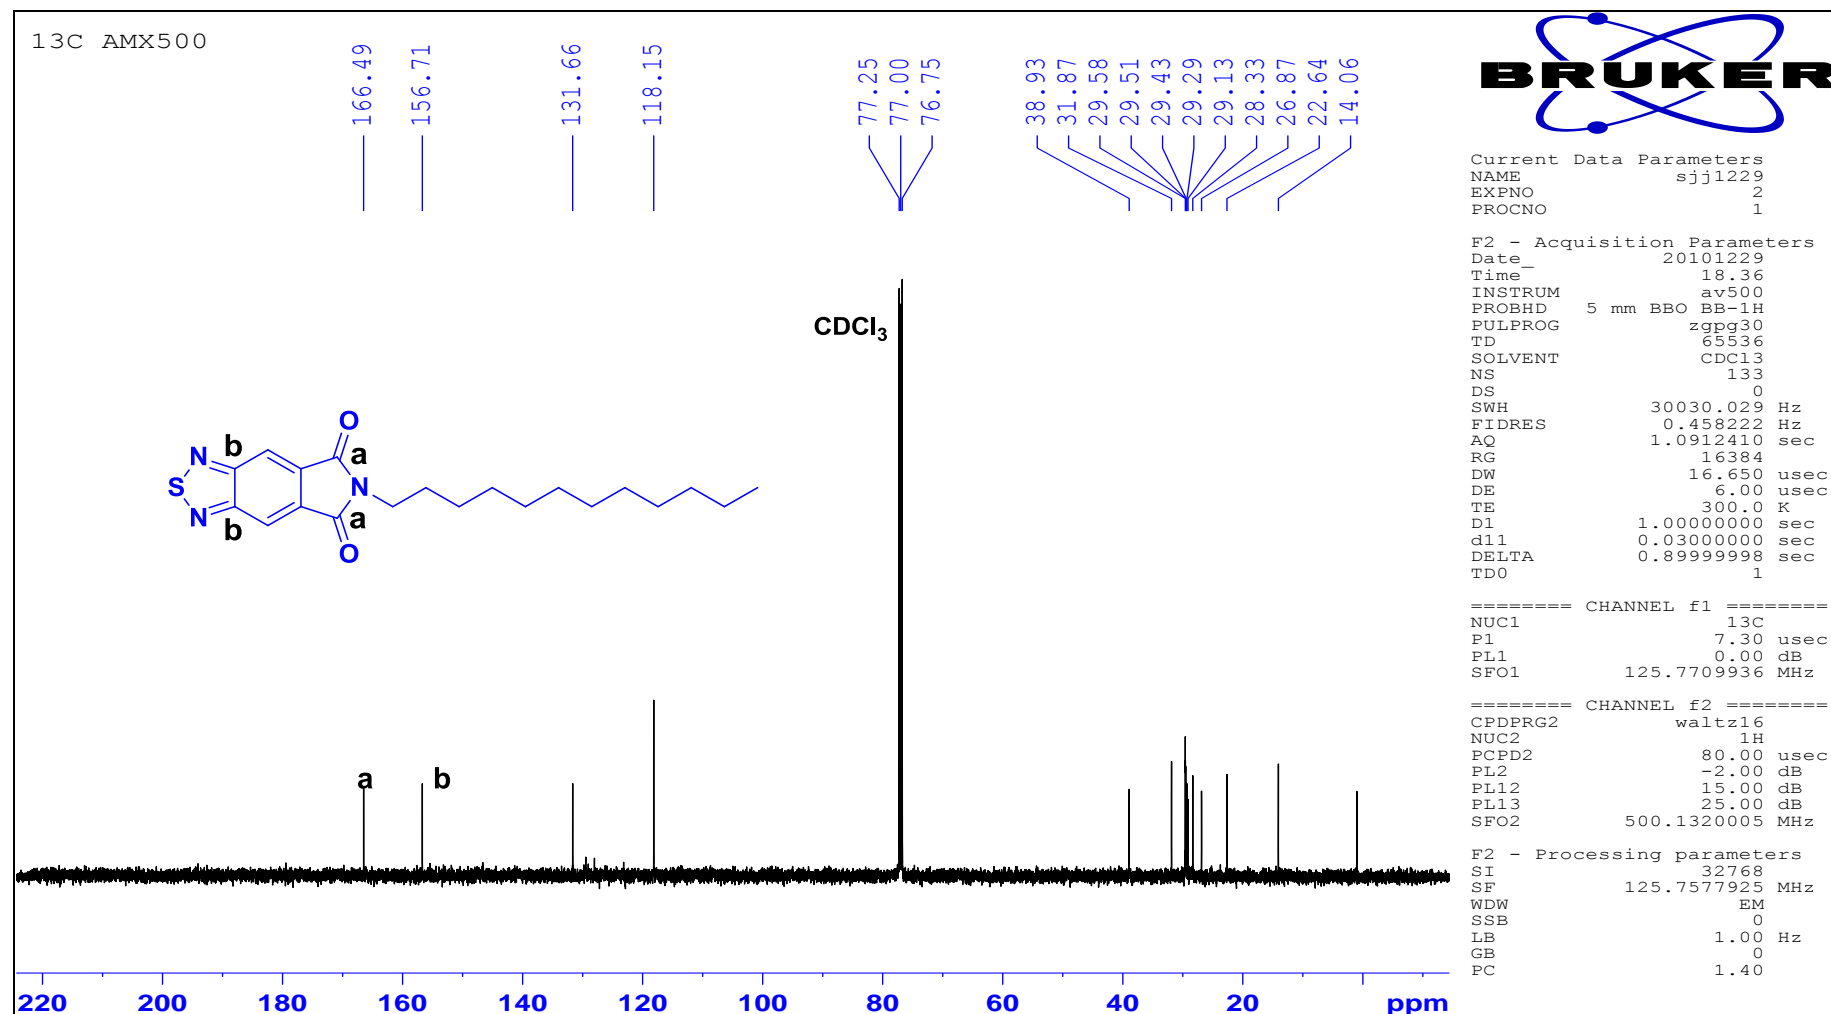

Electronic Supplementary Information (ESI) for Organic & Biomolecular Chemistry

<sup>1</sup>H NMR spectrum of compound **12a**

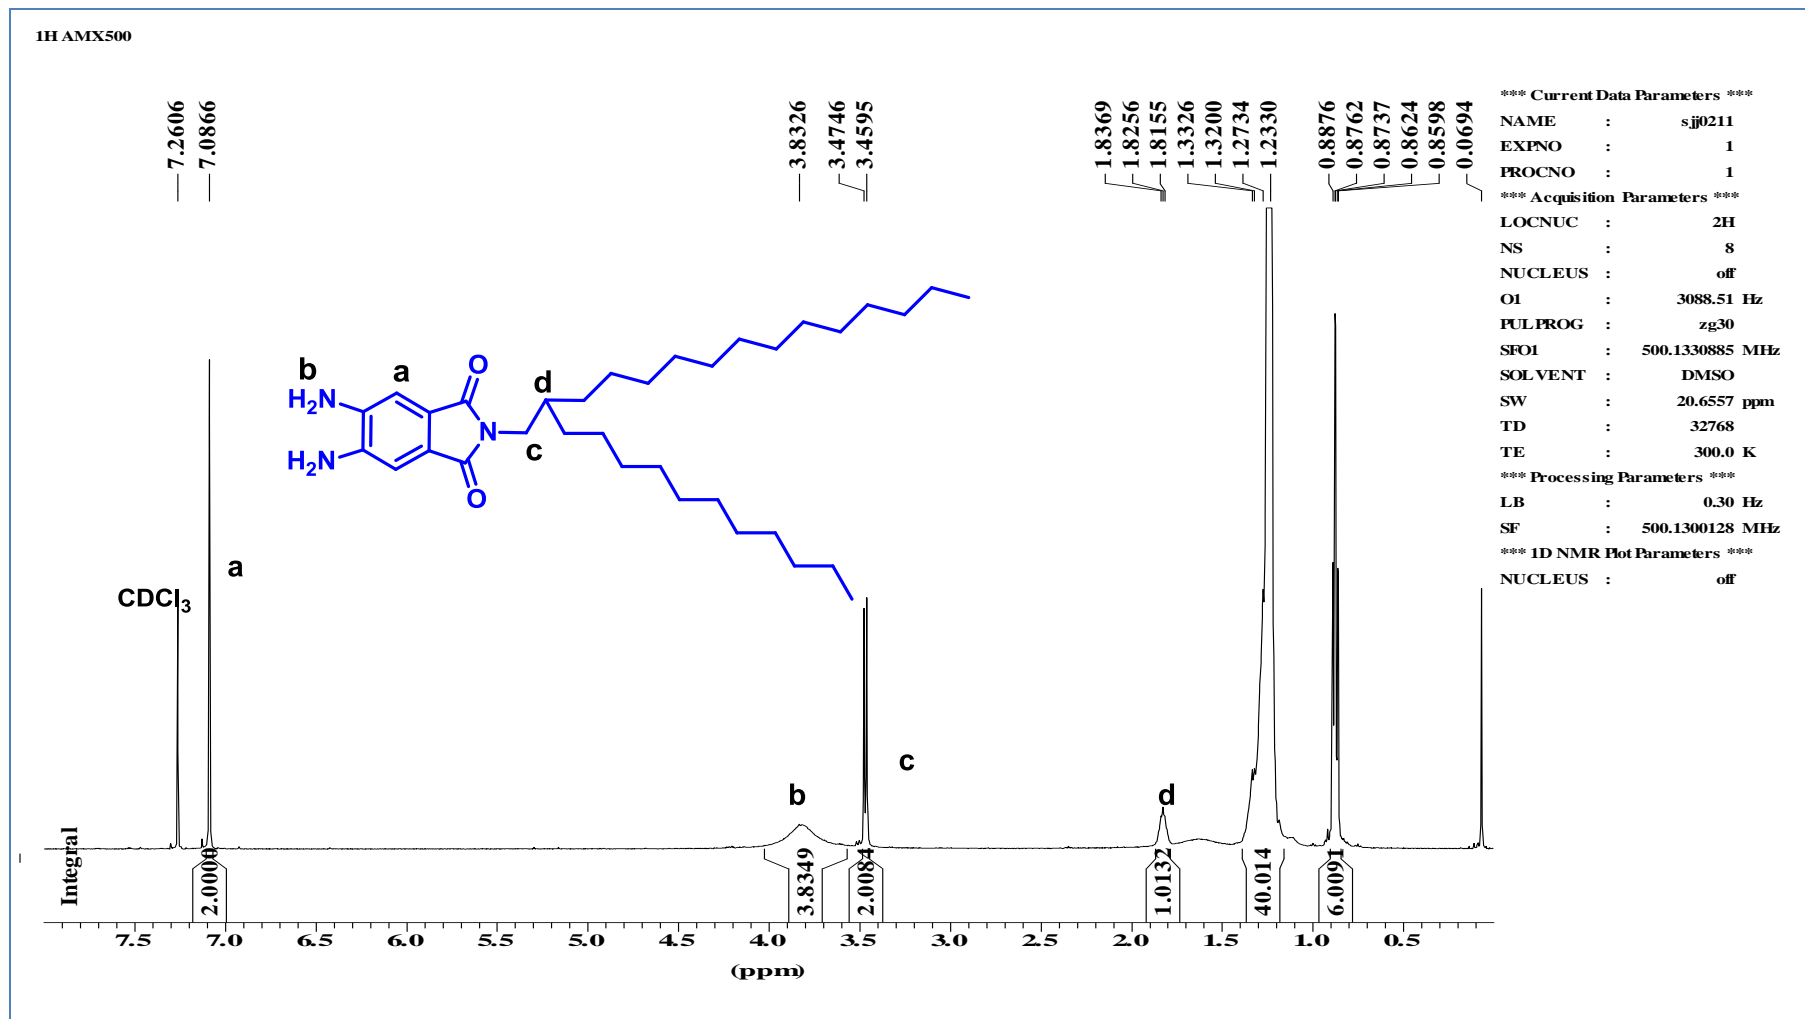

Electronic Supplementary Information (ESI) for Organic & Biomolecular Chemistry

<sup>13</sup>C NMR spectrum of compound **12a**

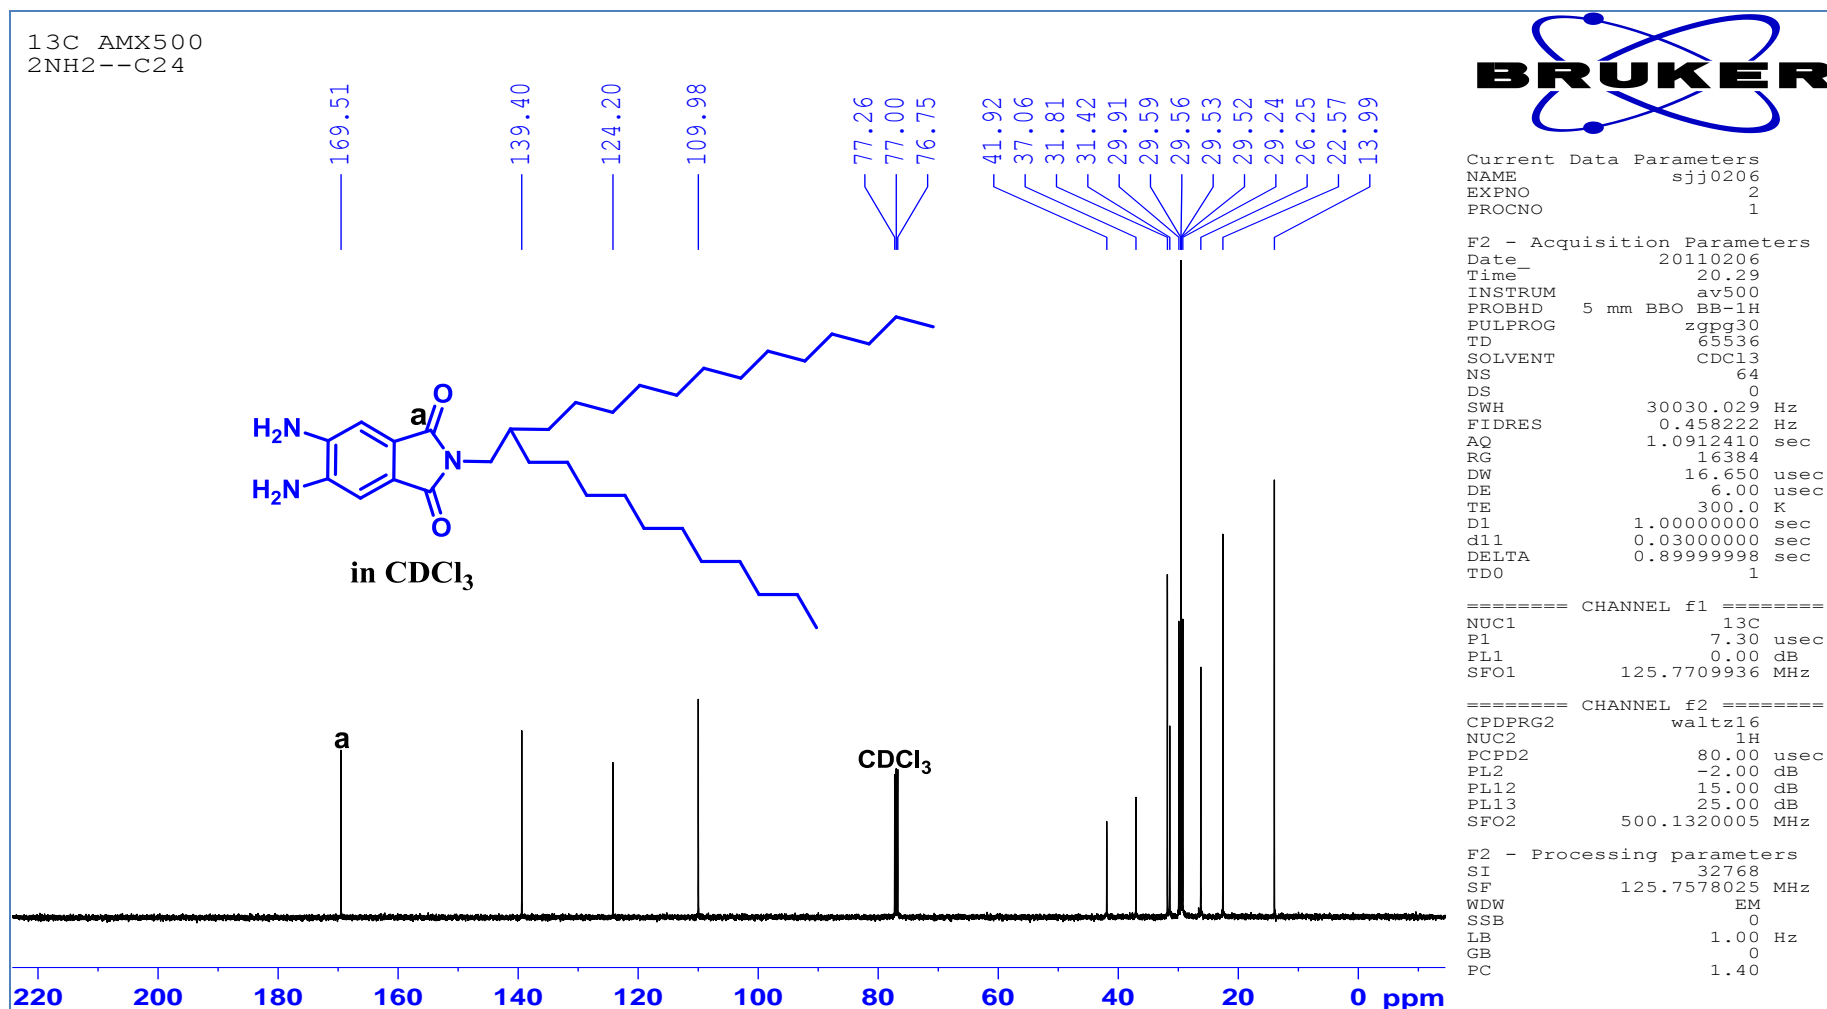

Electronic Supplementary Information (ESI) for Organic & Biomolecular Chemistry

<sup>1</sup>H NMR spectrum of compound **12b**

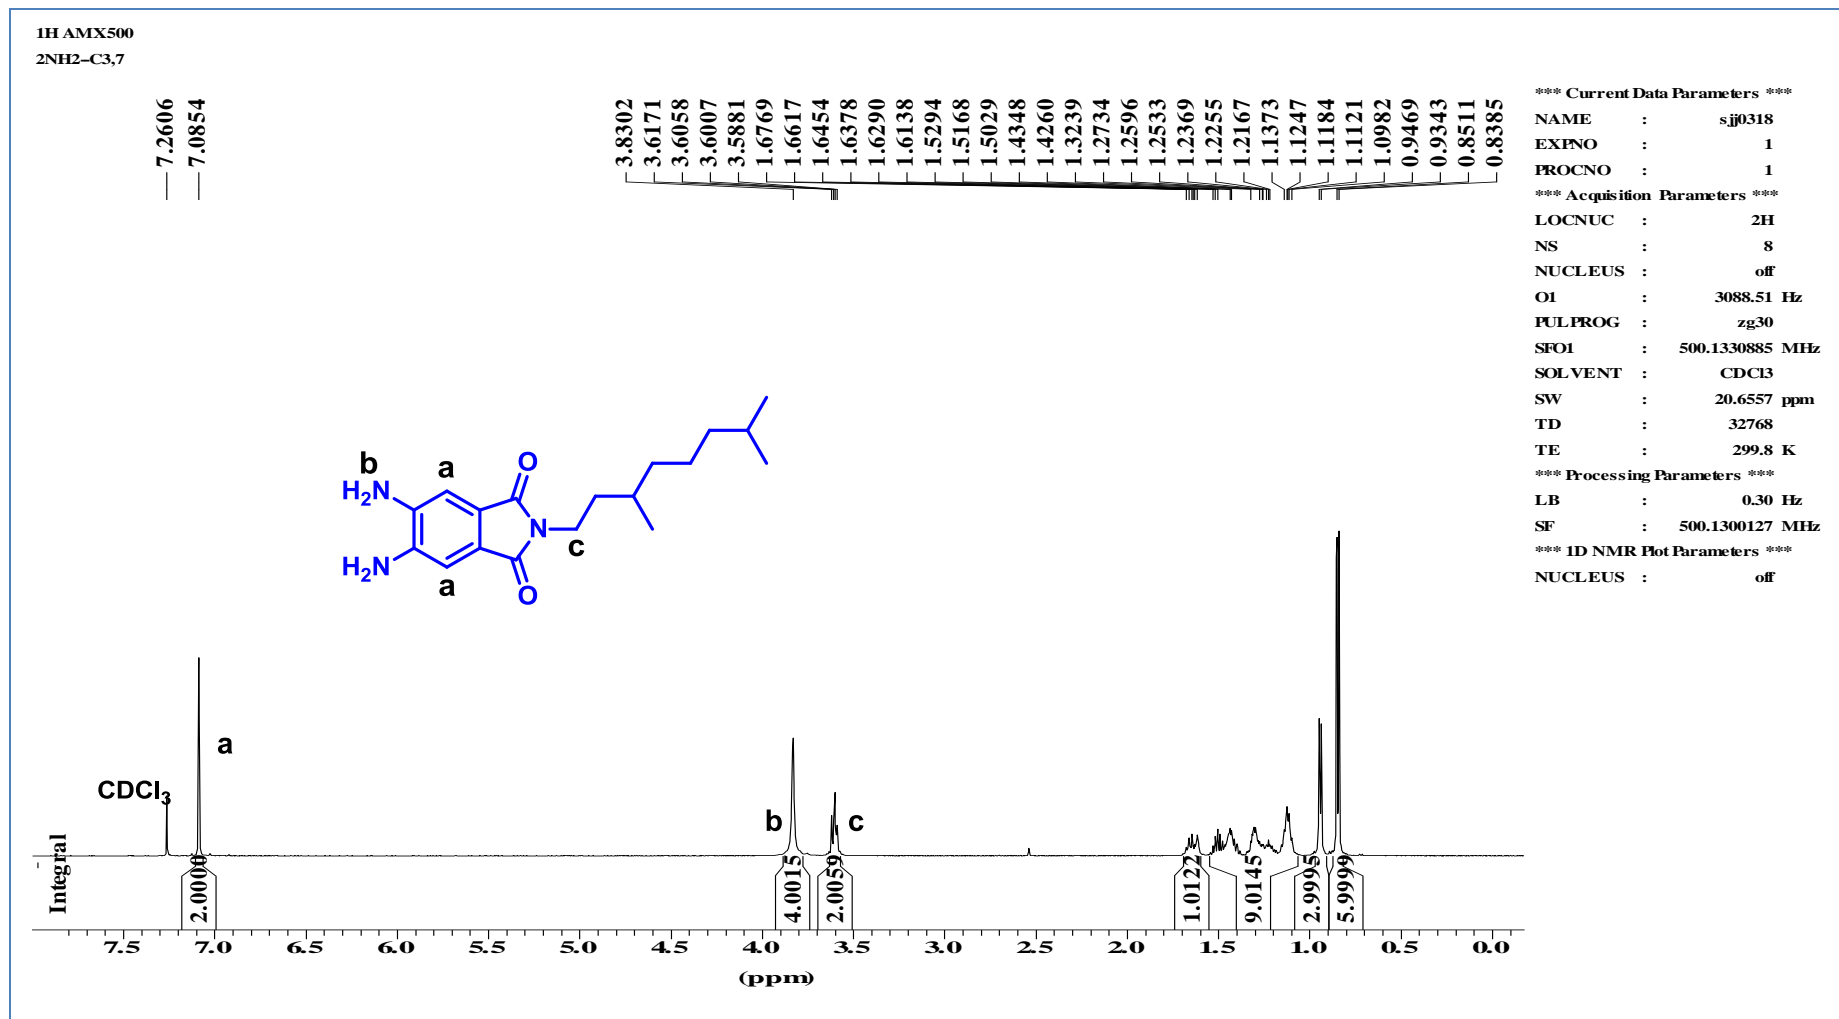



Electronic Supplementary Information (ESI) for Organic & Biomolecular Chemistry

<sup>13</sup>C NMR spectrum of compound **12b**

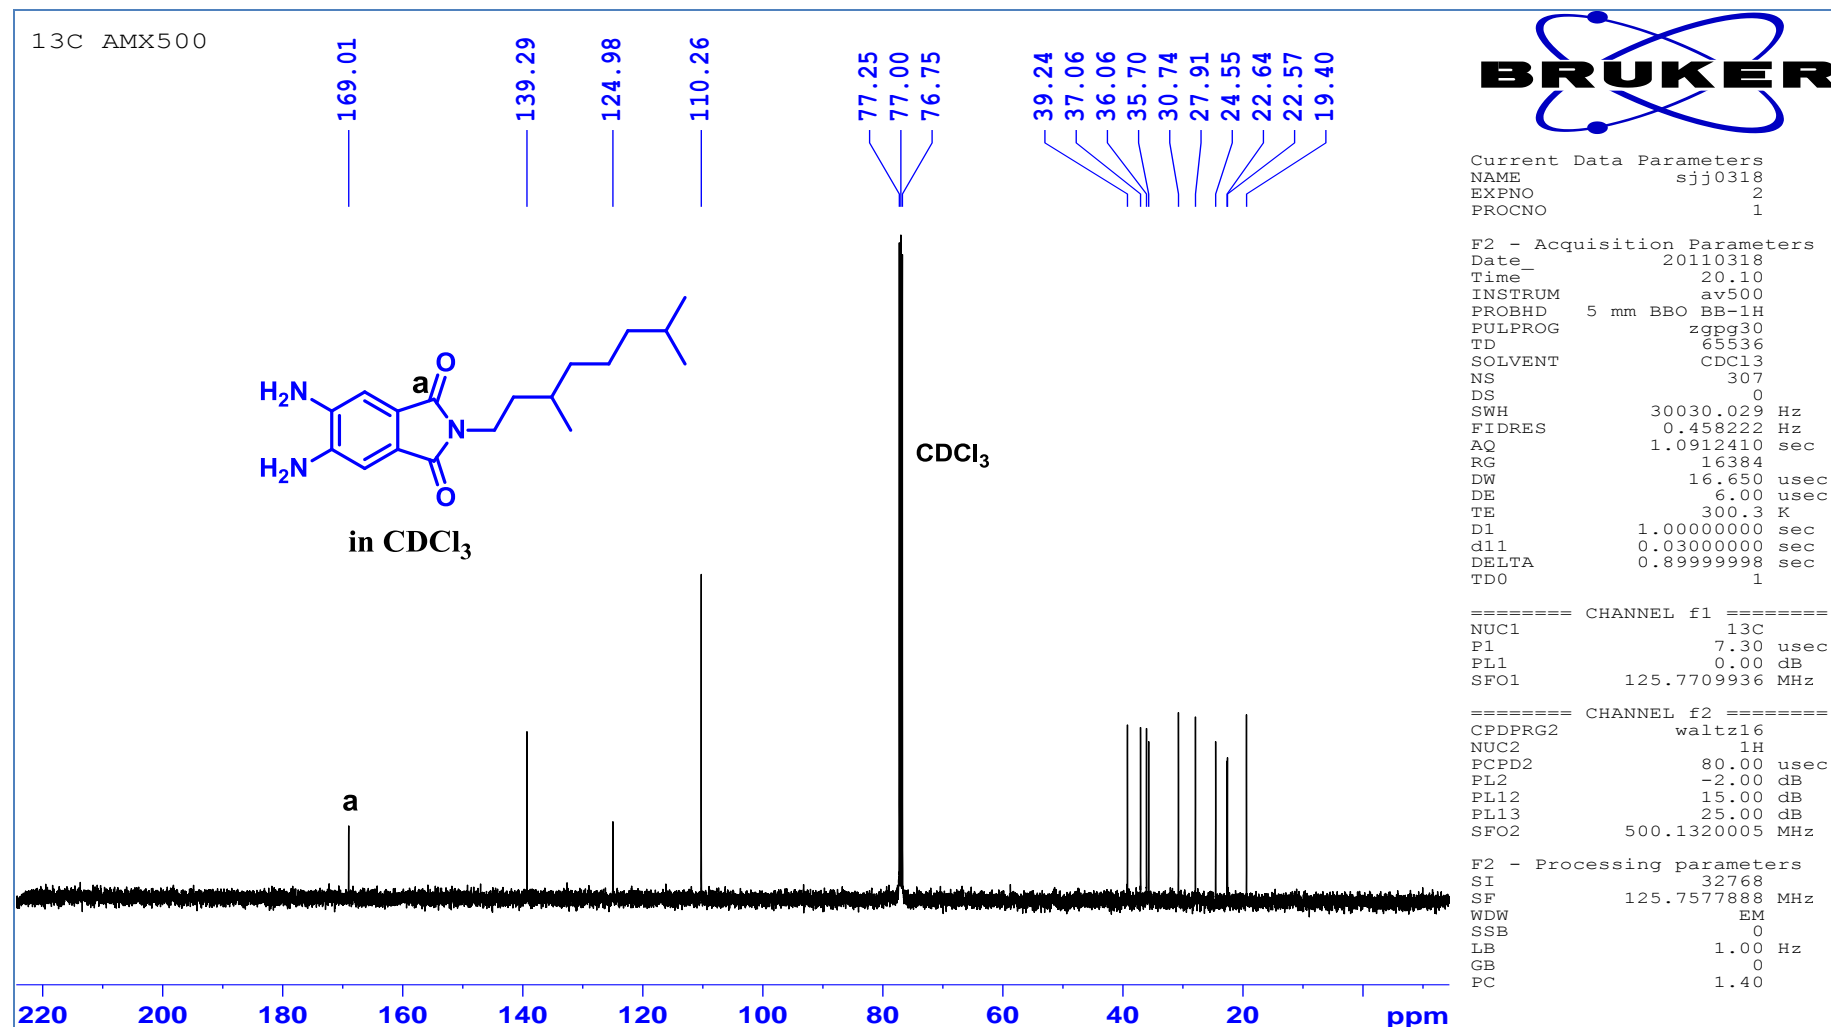

Electronic Supplementary Information (ESI) for Organic & Biomolecular Chemistry

<sup>1</sup>H NMR spectrum of compound 12c

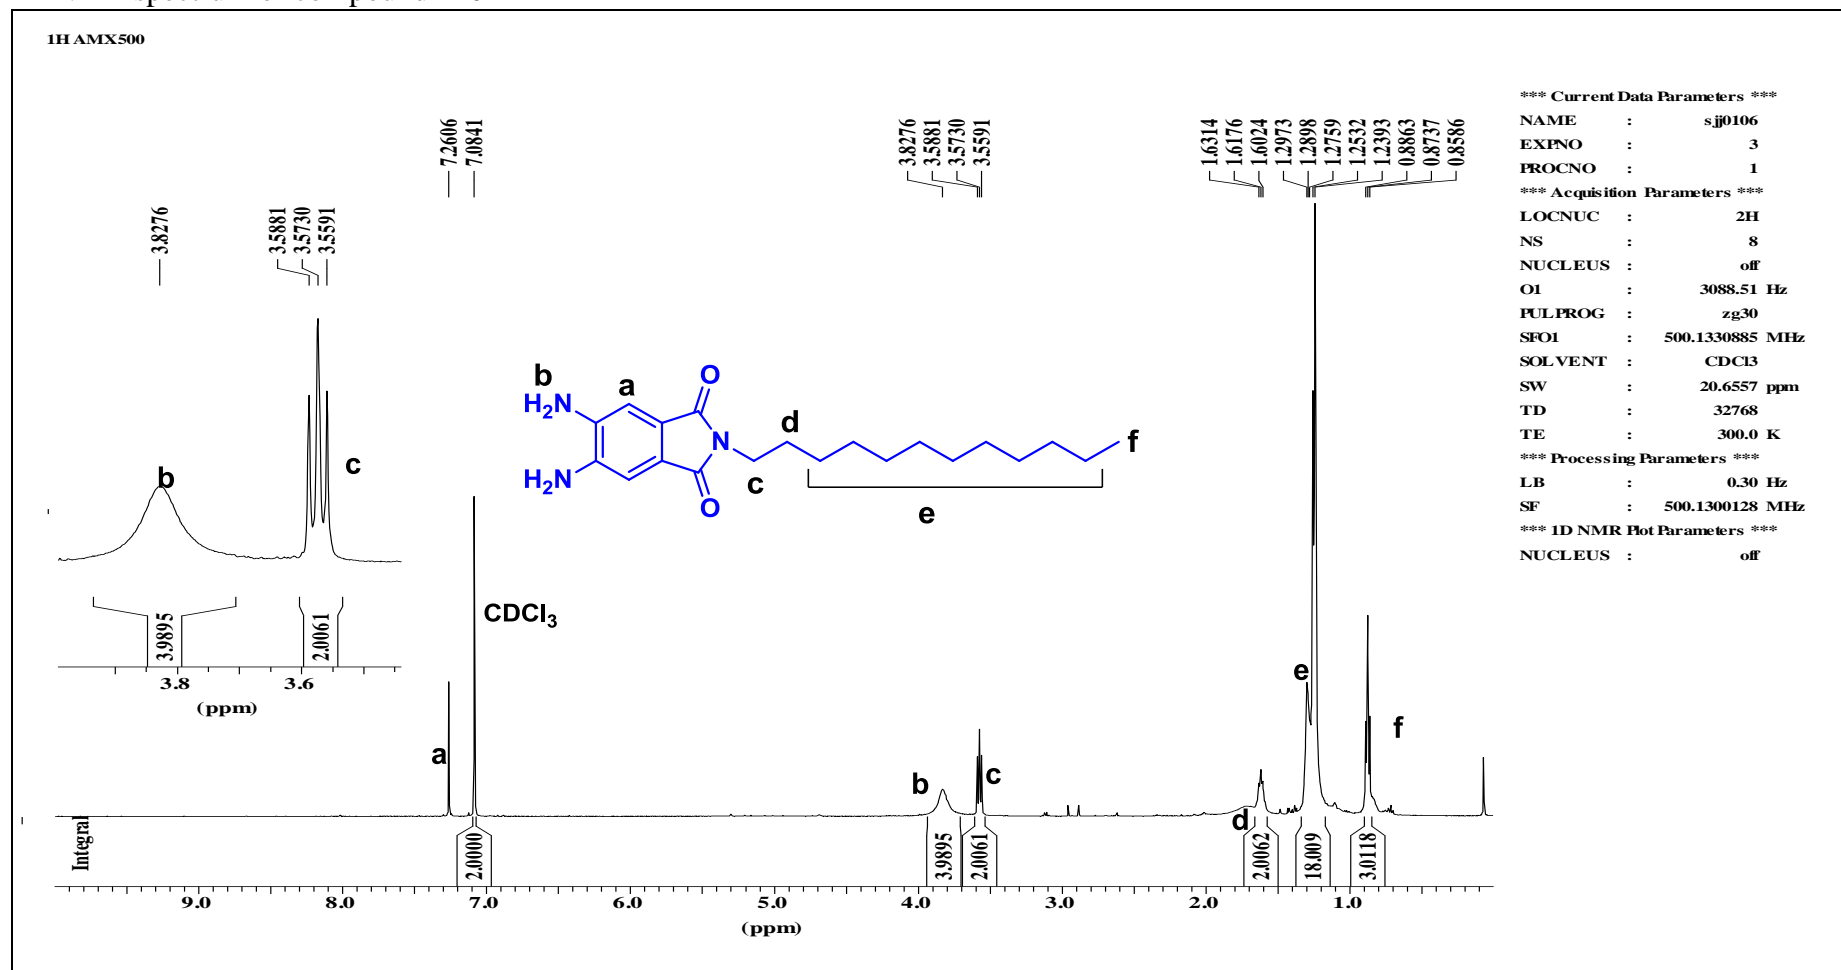

Electronic Supplementary Information (ESI) for Organic & Biomolecular Chemistry

$^{13}\text{C}$  NMR spectrum of compound **12c**

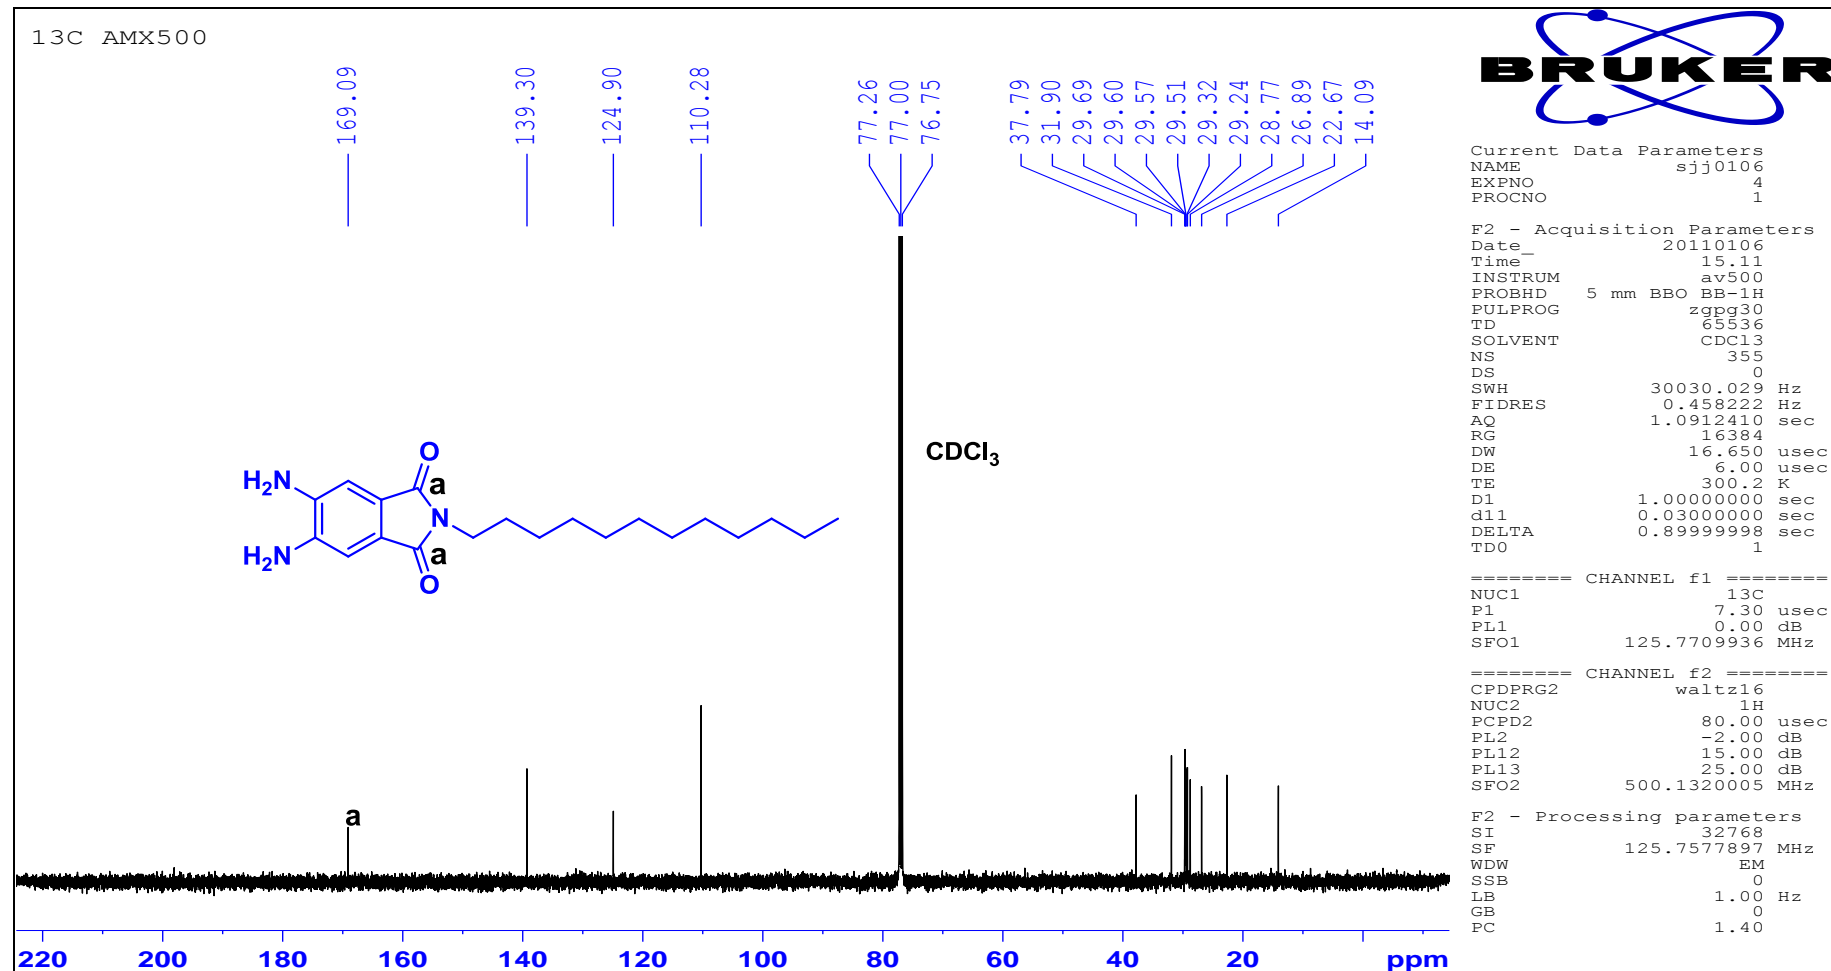

Electronic Supplementary Information (ESI) for Organic & Biomolecular Chemistry

<sup>1</sup>H NMR spectrum of compound **1a**

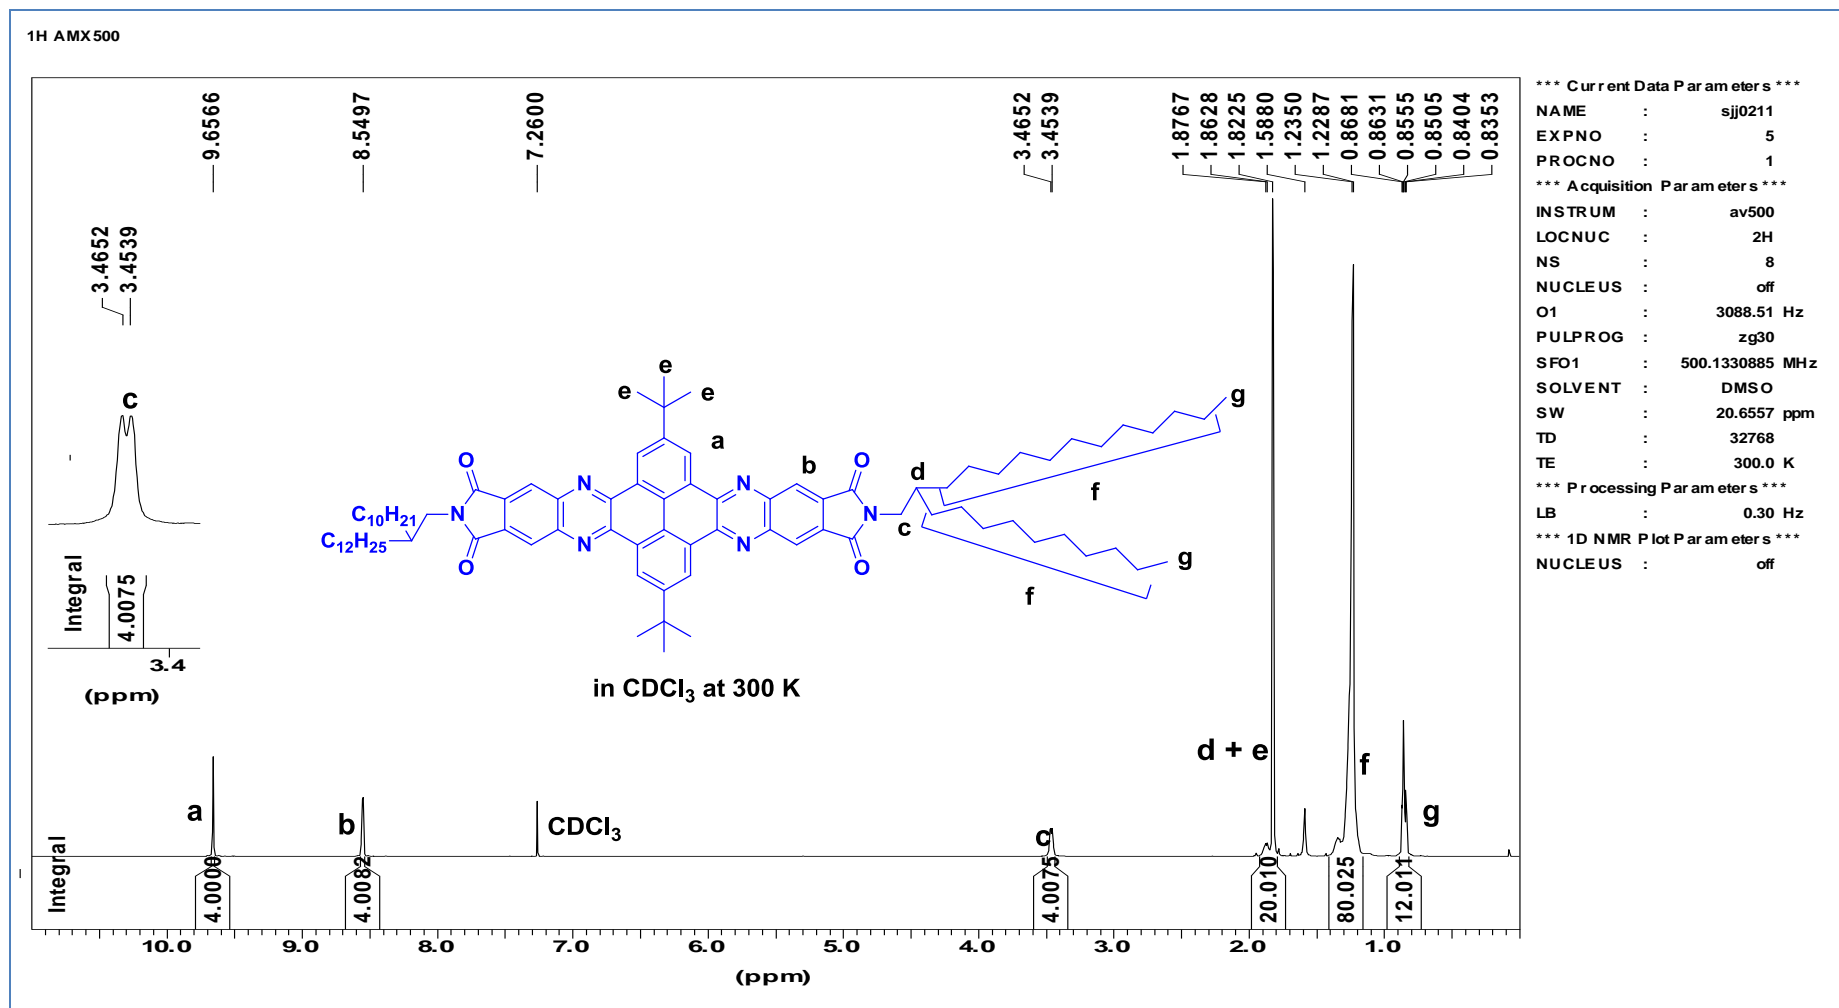

Electronic Supplementary Information (ESI) for Organic & Biomolecular Chemistry

$^{13}\text{C}$  NMR spectrum of compound **1a**

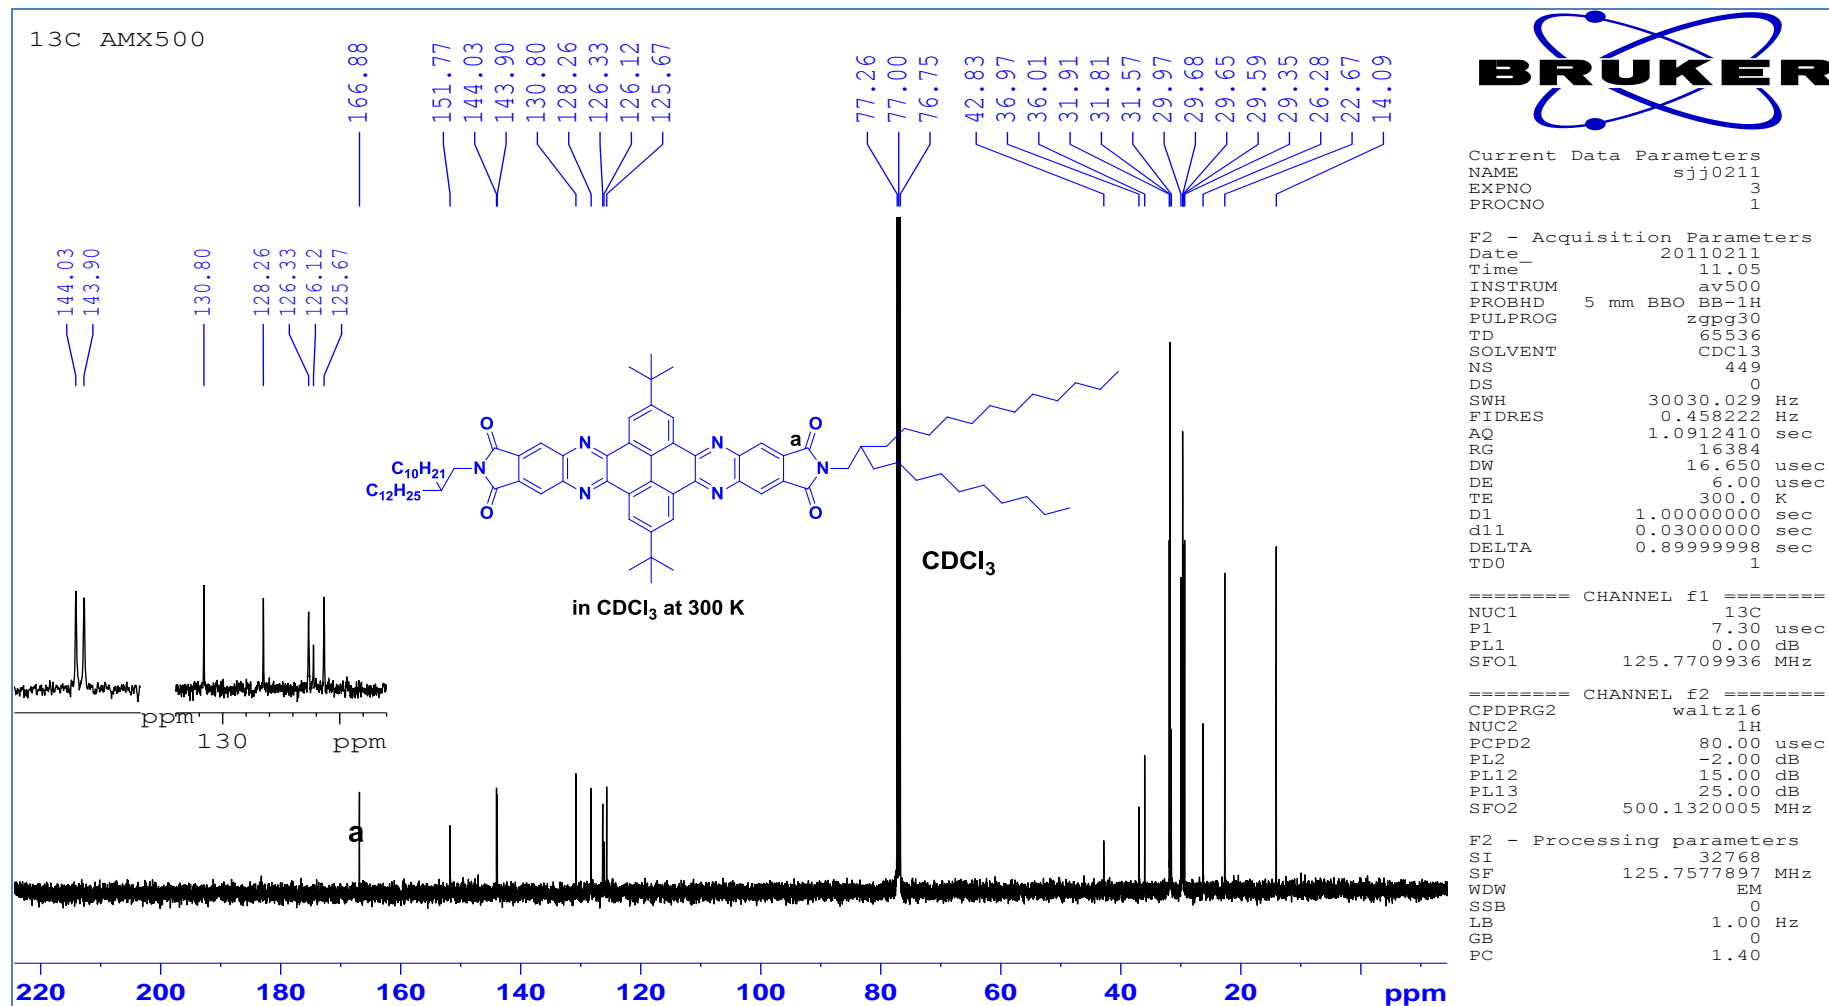

Electronic Supplementary Information (ESI) for Organic & Biomolecular Chemistry

<sup>1</sup>H NMR spectrum of compound **1b**

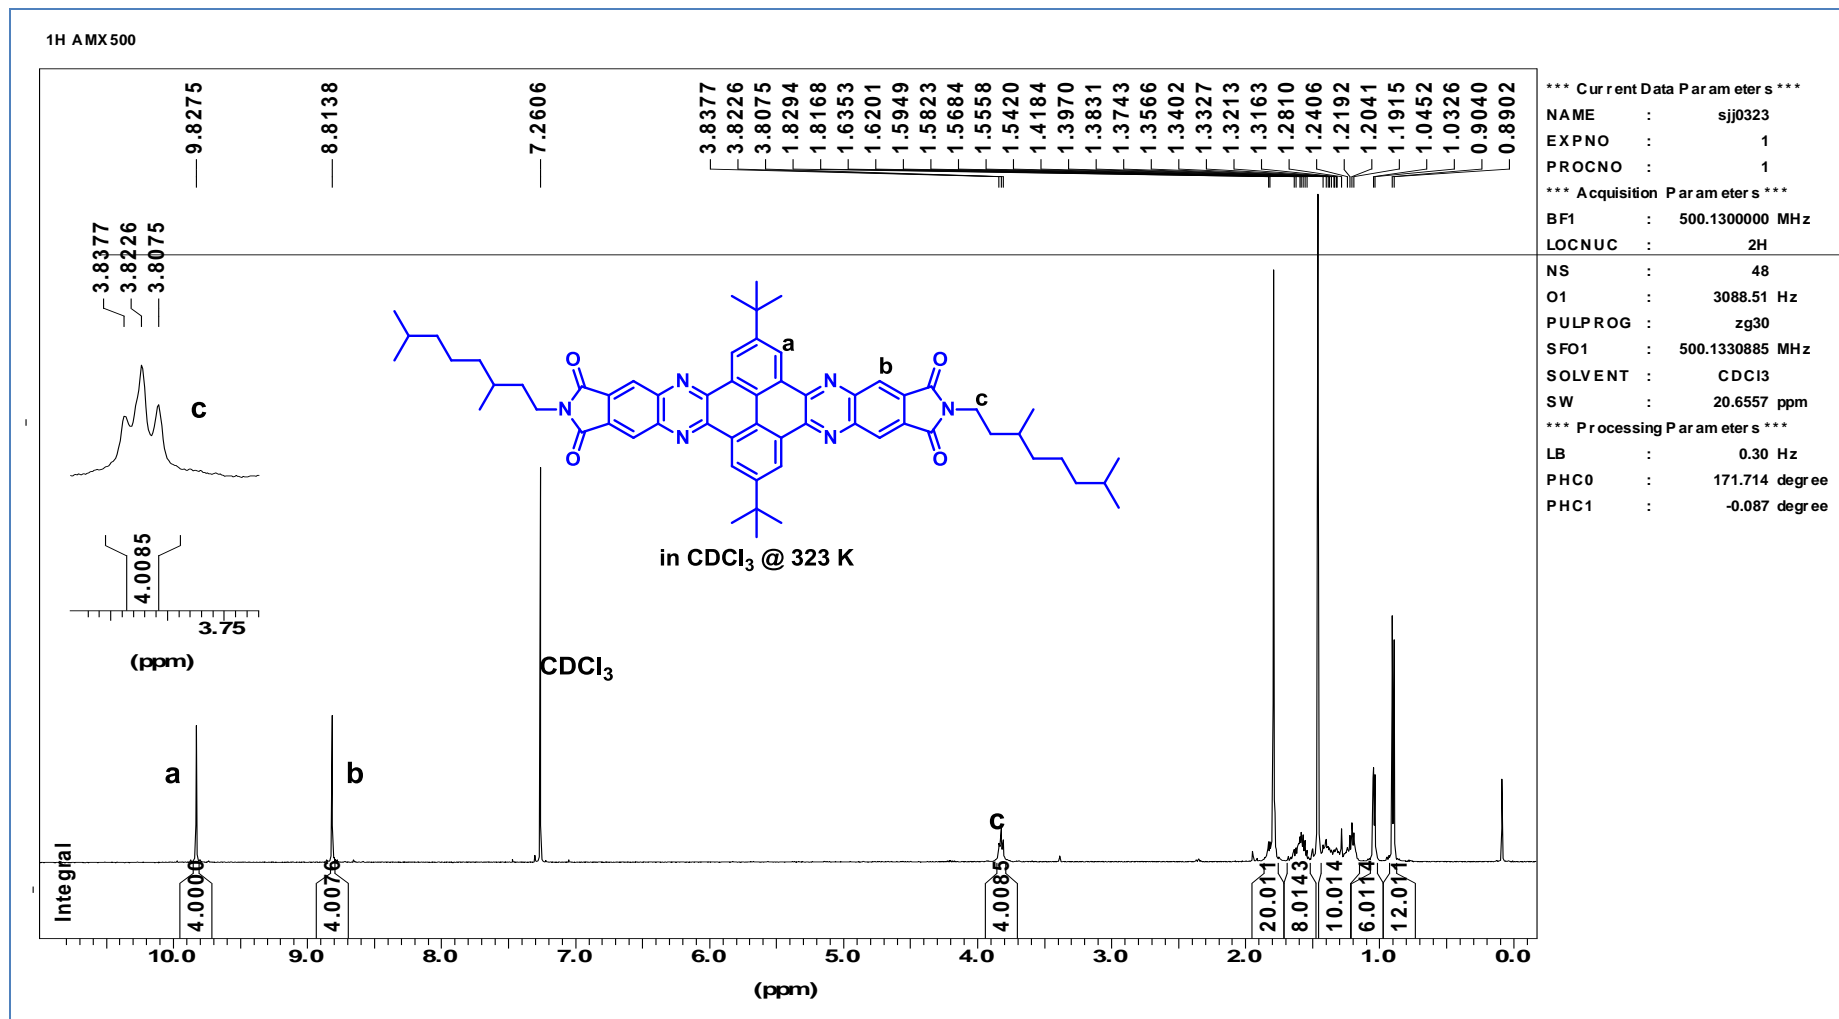

Electronic Supplementary Information (ESI) for Organic & Biomolecular Chemistry

<sup>13</sup>C NMR spectrum of compound **1b**

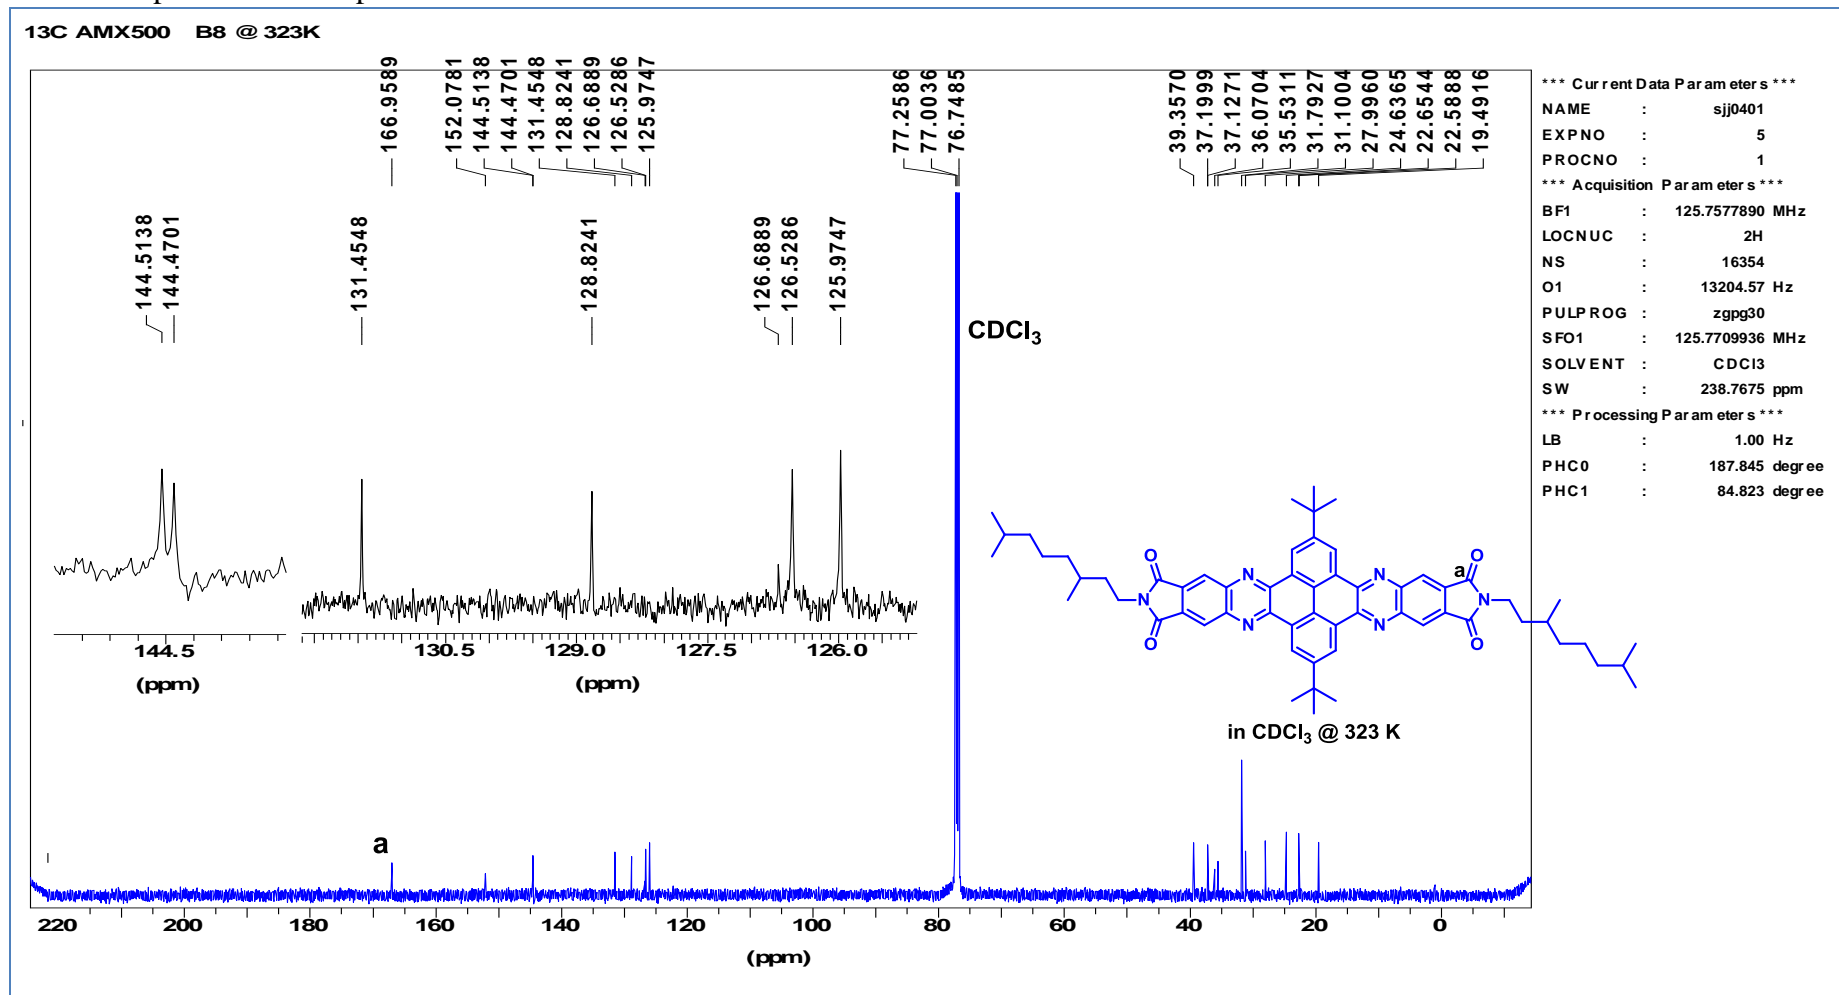

Electronic Supplementary Information (ESI) for Organic & Biomolecular Chemistry

<sup>1</sup>H NMR spectrum of compound 2a

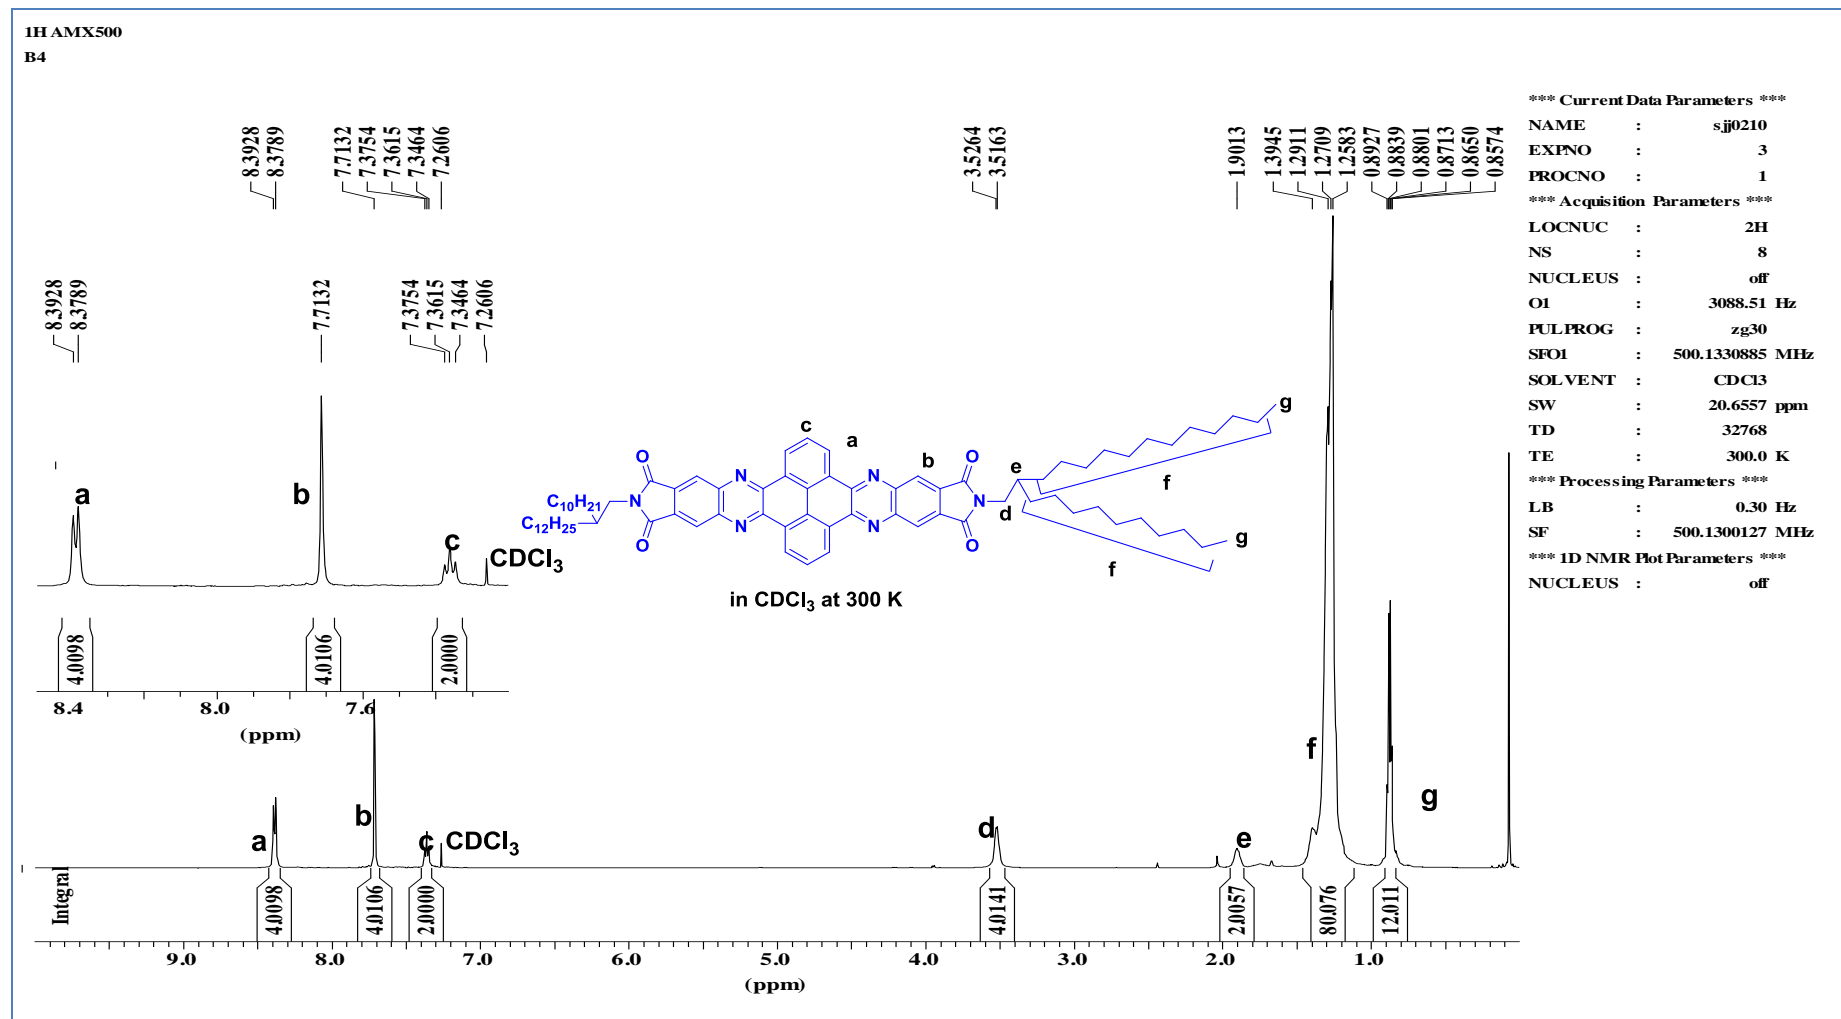



Electronic Supplementary Information (ESI) for Organic & Biomolecular Chemistry

$^{13}\text{C}$  NMR spectrum of compound **2a**

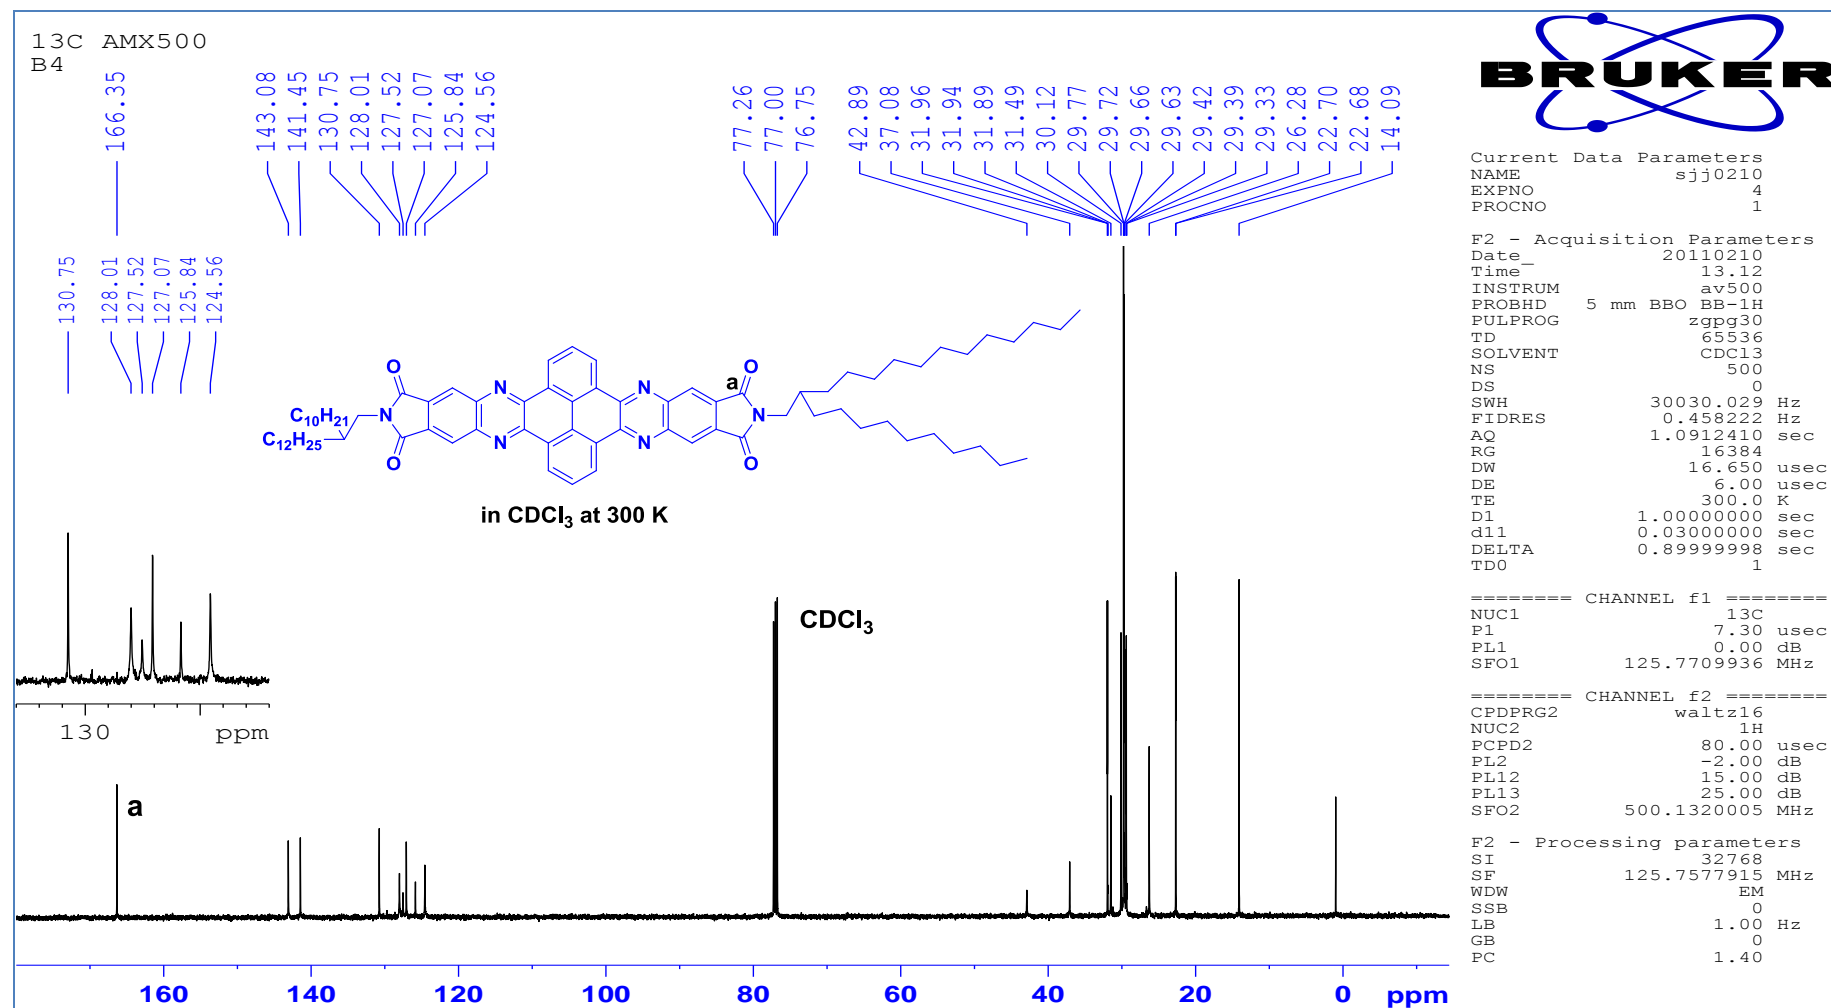

Electronic Supplementary Information (ESI) for Organic & Biomolecular Chemistry

<sup>1</sup>H NMR spectrum of compound **2b**

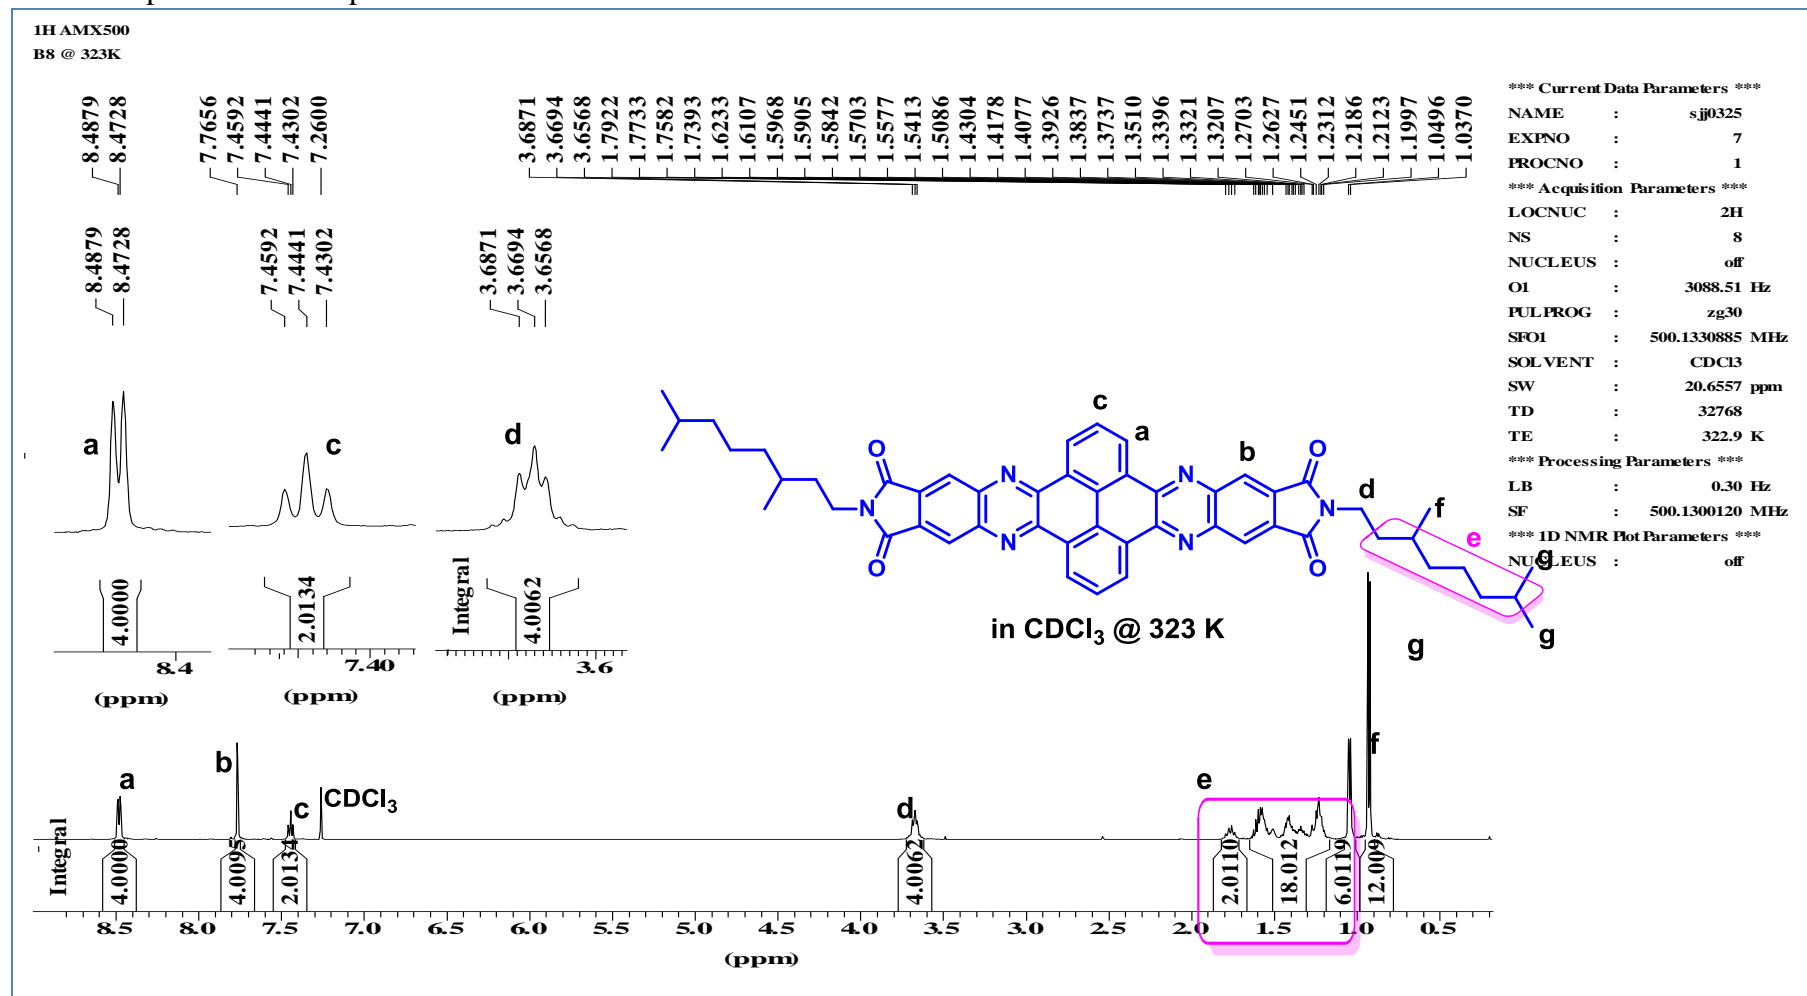

Electronic Supplementary Information (ESI) for Organic & Biomolecular Chemistry

<sup>13</sup>C NMR spectrum of compound **2b**

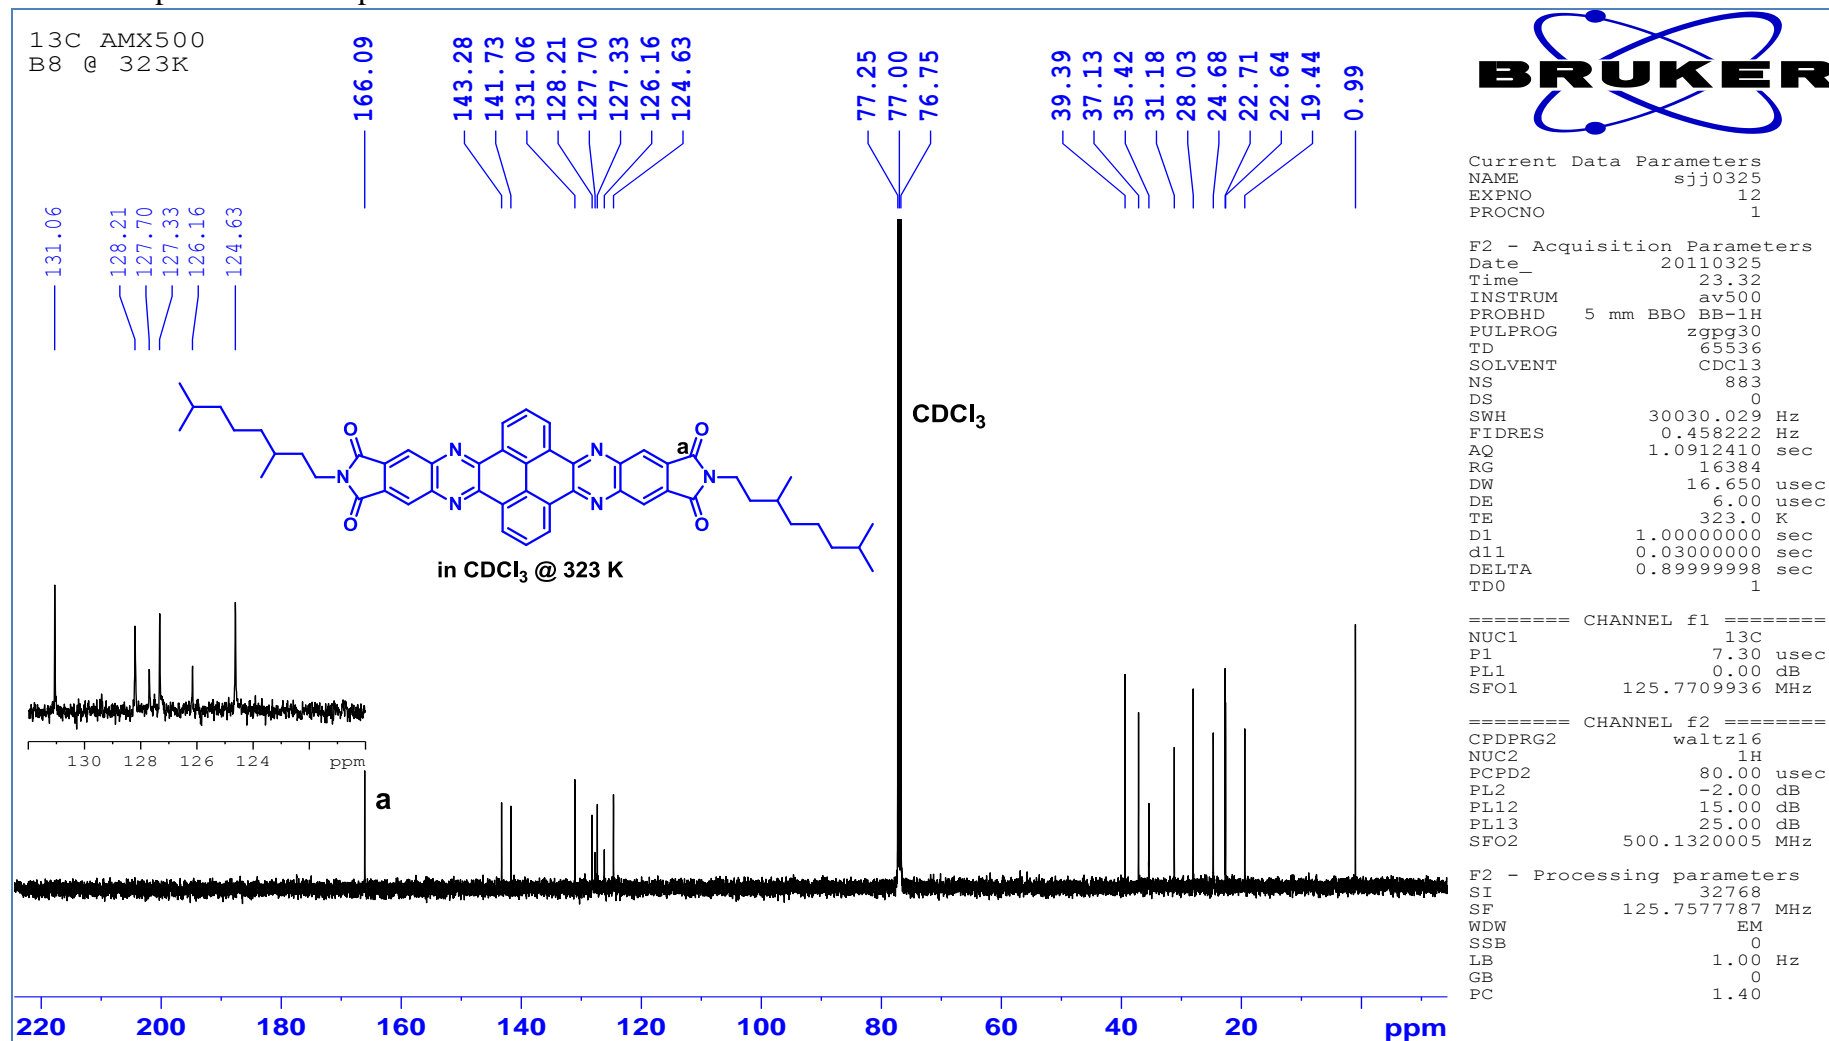

Electronic Supplementary Information (ESI) for Organic & Biomolecular Chemistry

<sup>1</sup>H NMR spectrum of compound 3

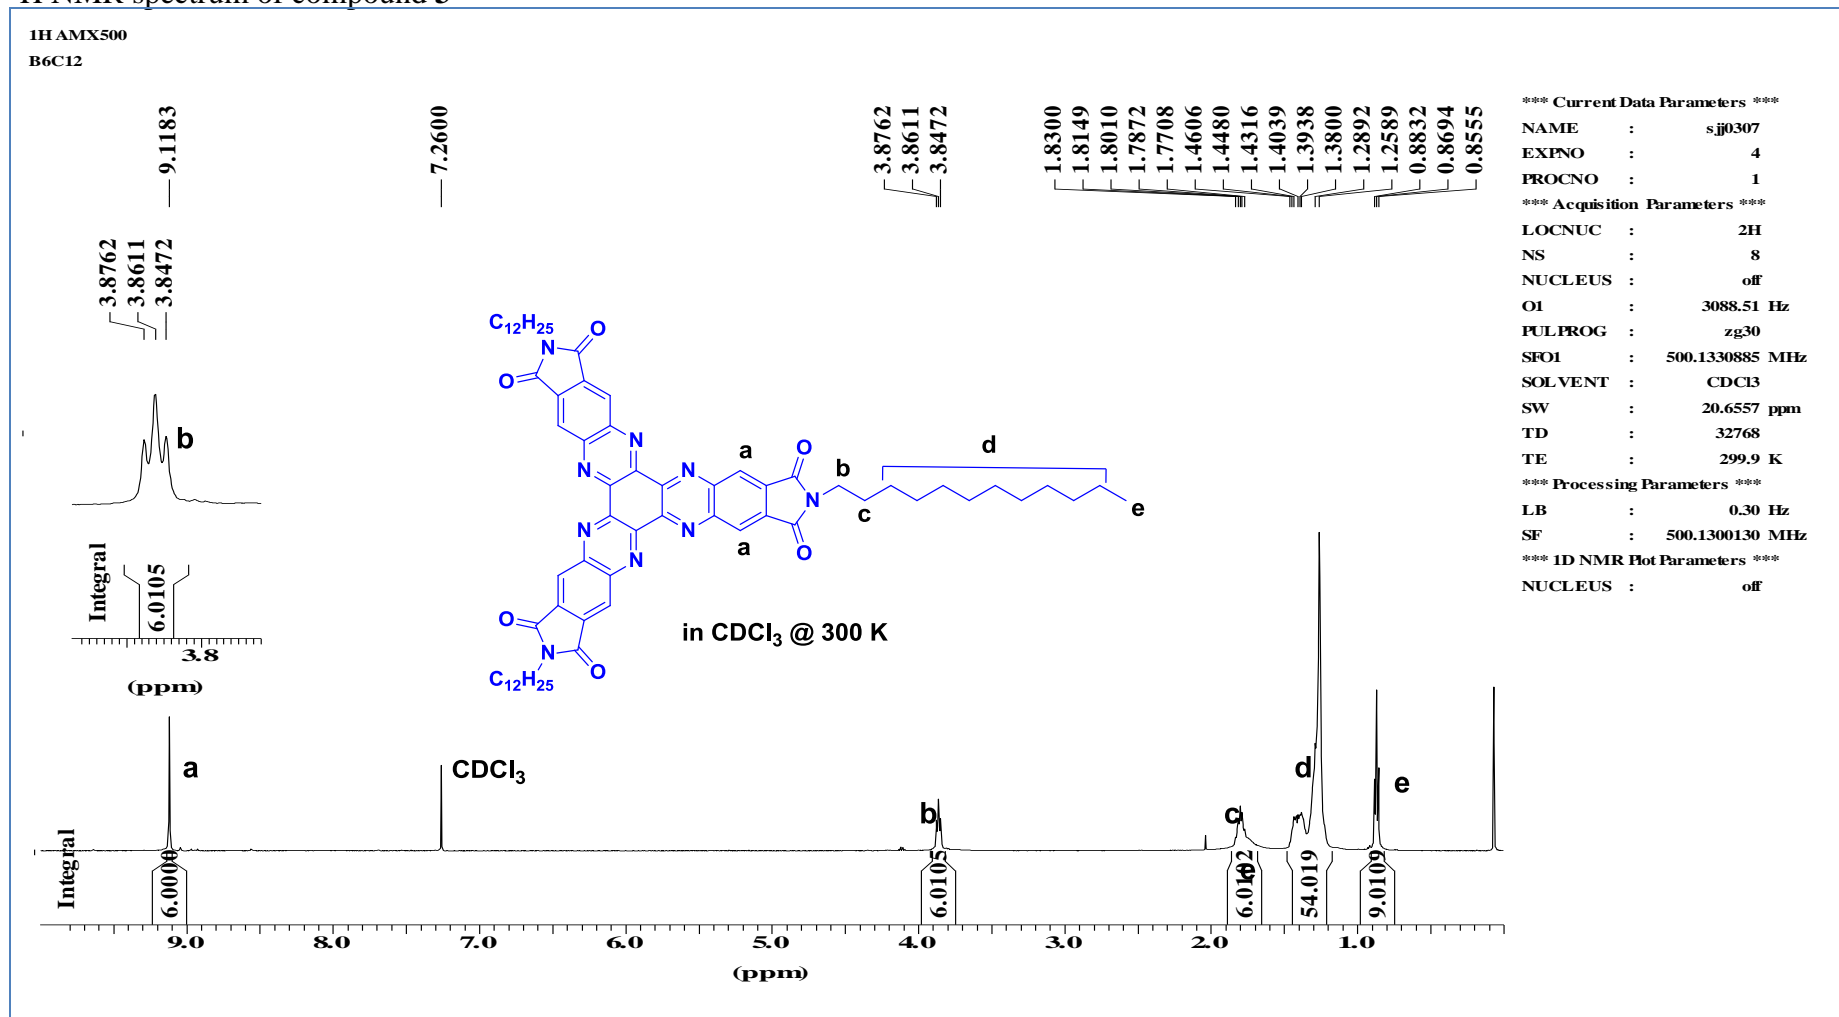

Electronic Supplementary Information (ESI) for Organic & Biomolecular Chemistry

$^{13}\text{C}$  NMR spectrum of compound 3

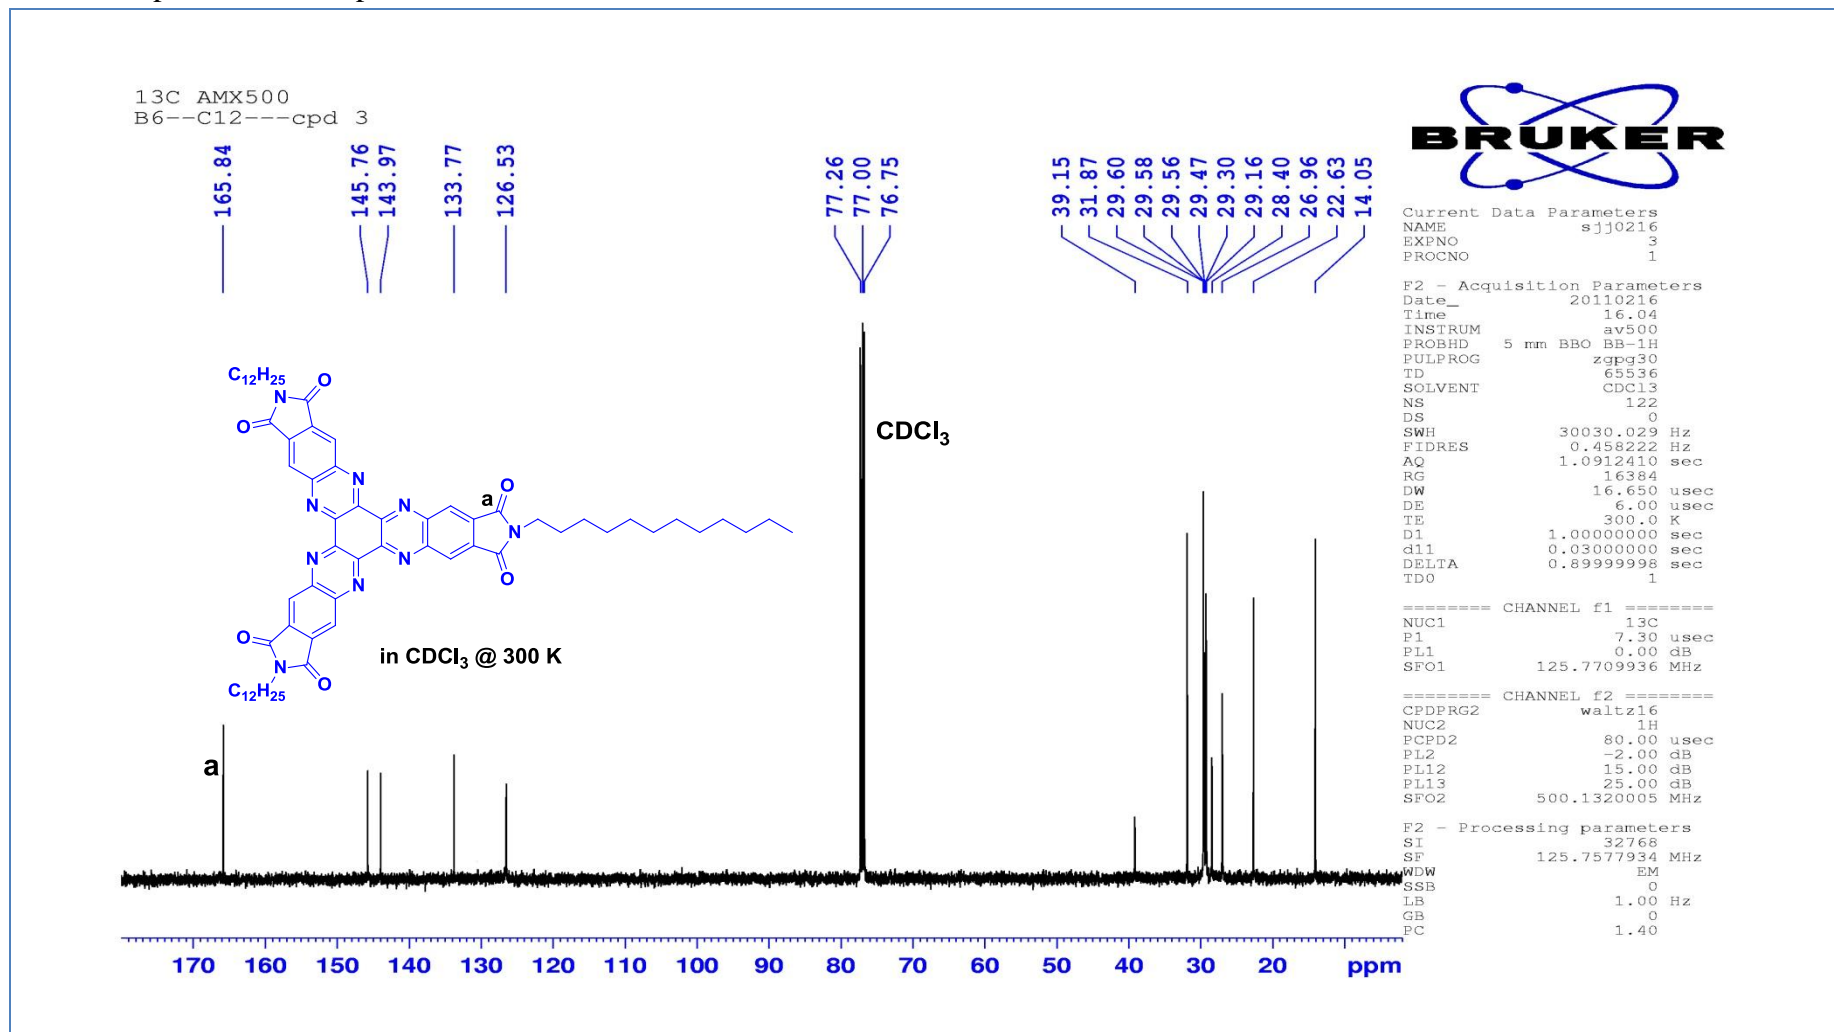

## 10. MALDI-TOF mass spectra for 1a-b, 2a-b and 3.

### MALDI-TOF MS spectrum for 1a (Pepmix as internal standard)

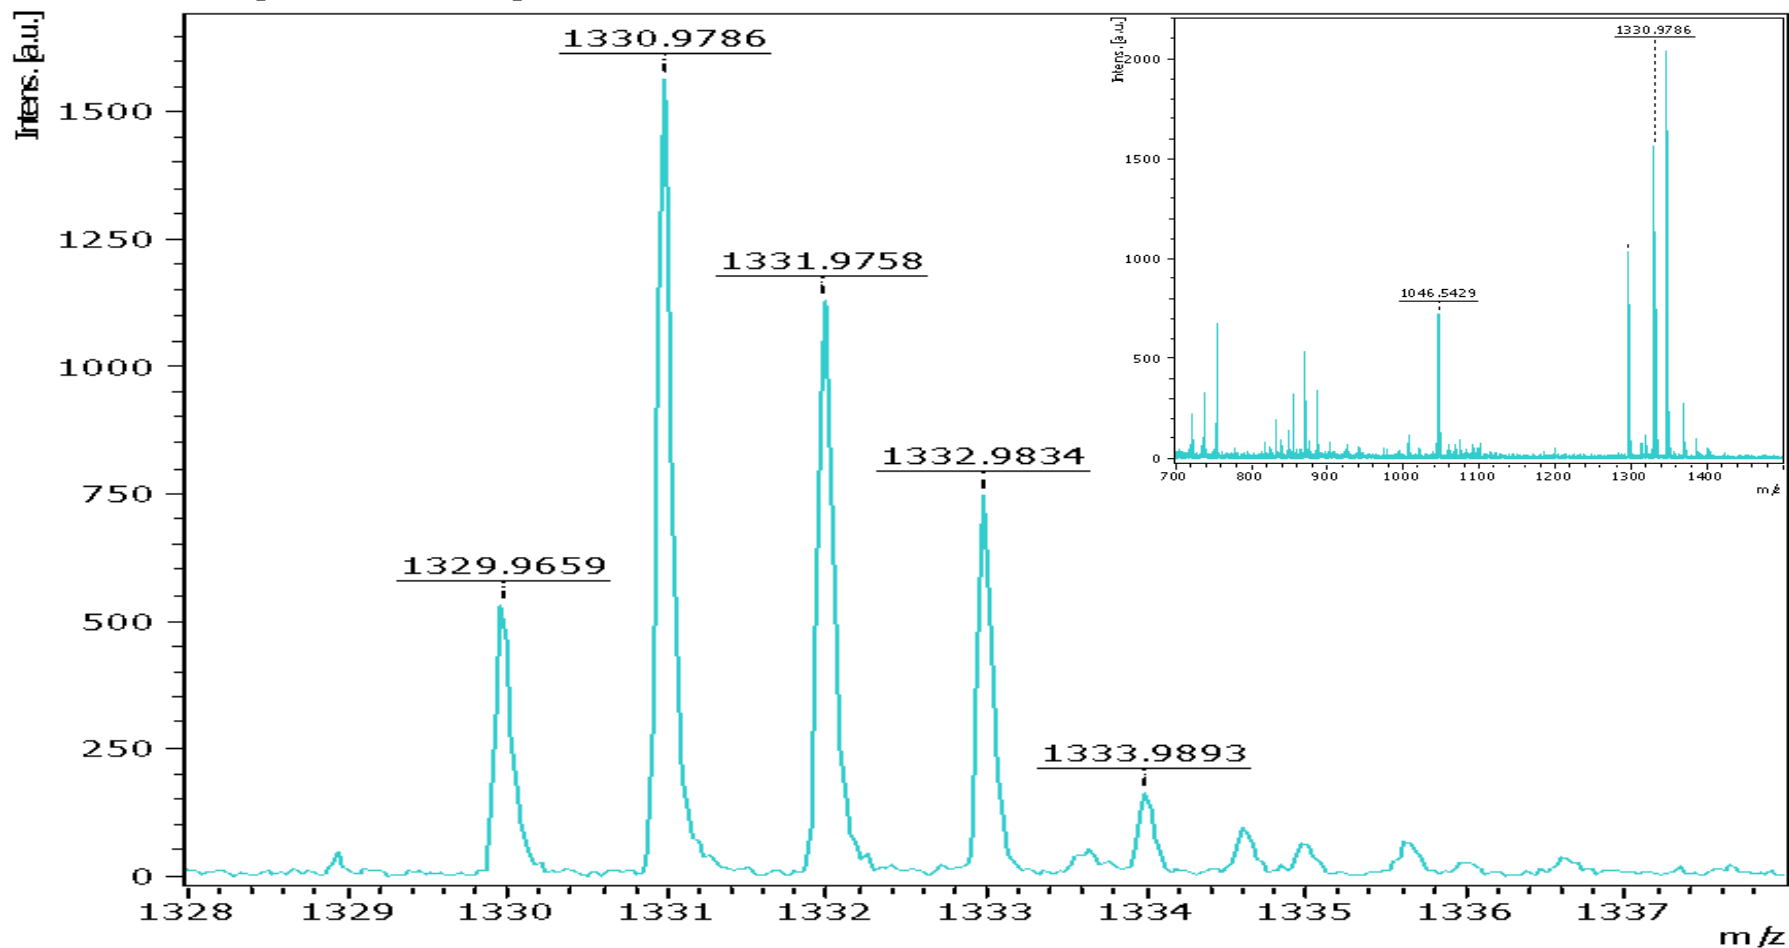

Electronic Supplementary Information (ESI) for Organic & Biomolecular Chemistry

MALDI-TOF MS spectrum for 1b (Pepmix as external standard)

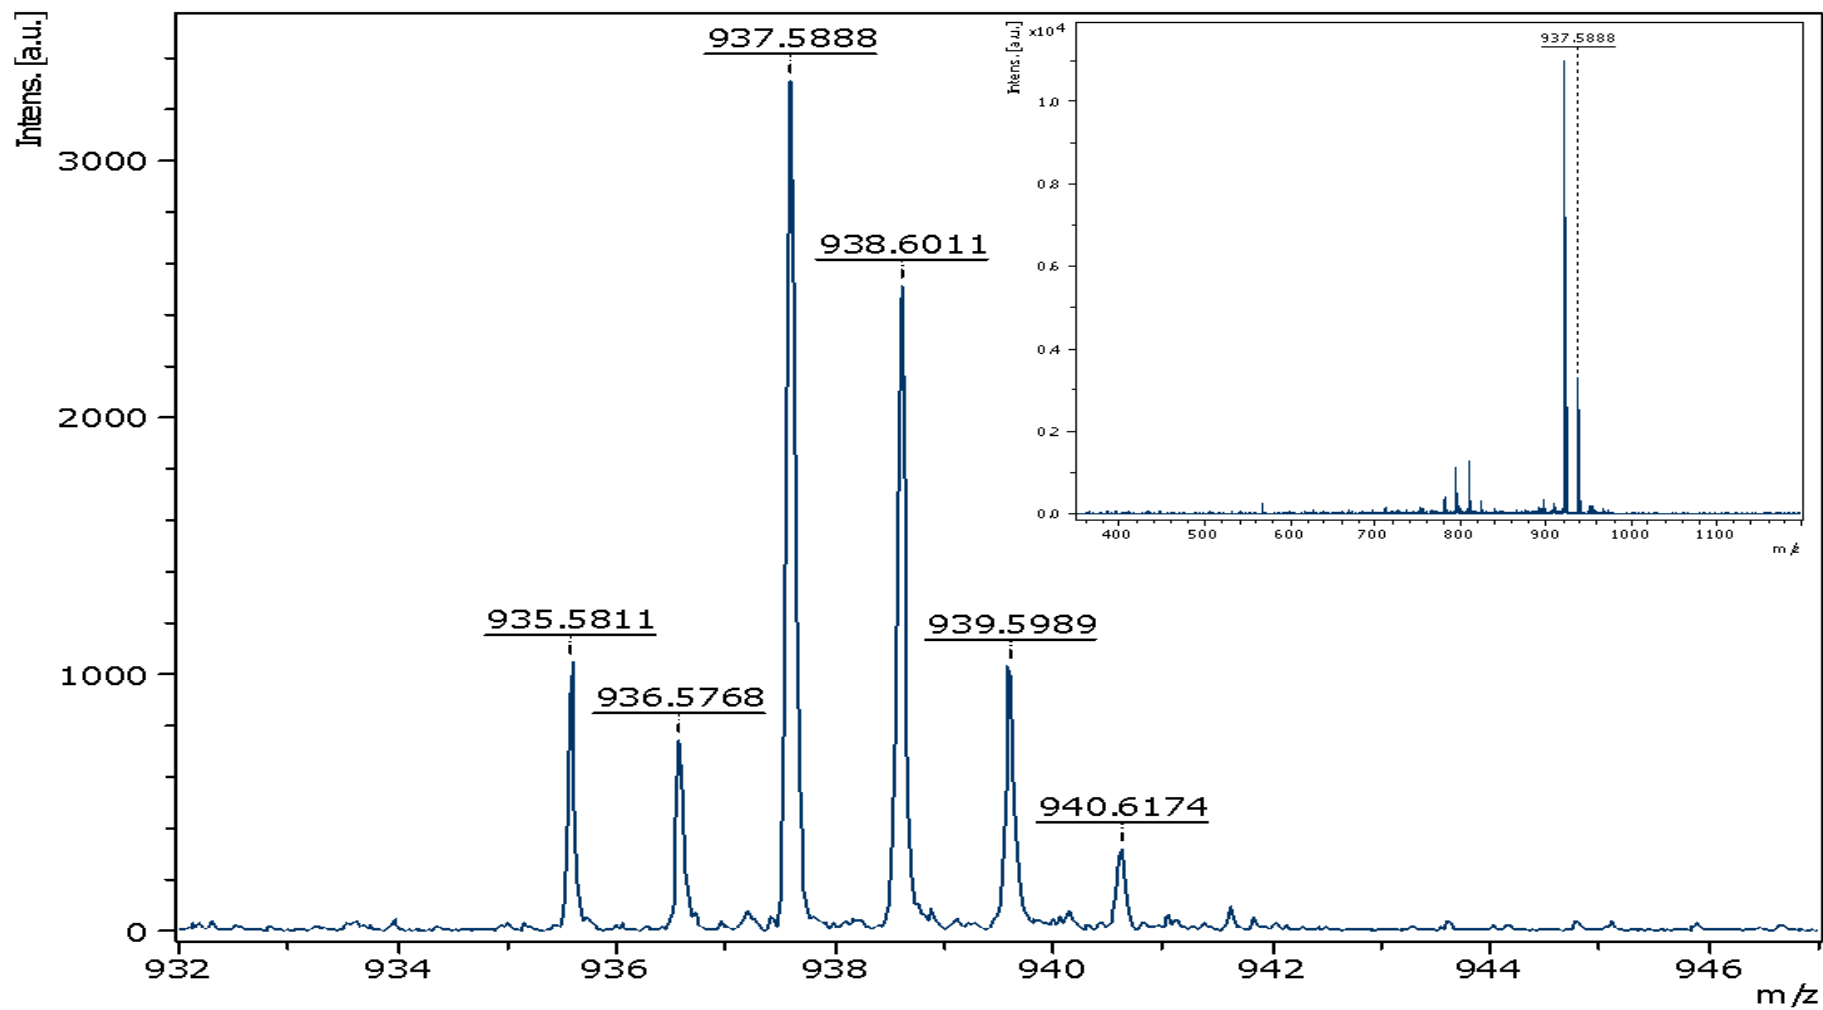

Electronic Supplementary Information (ESI) for Organic & Biomolecular Chemistry

MALDI-TOF MS spectrum for 2a (Pepmix as external standard)

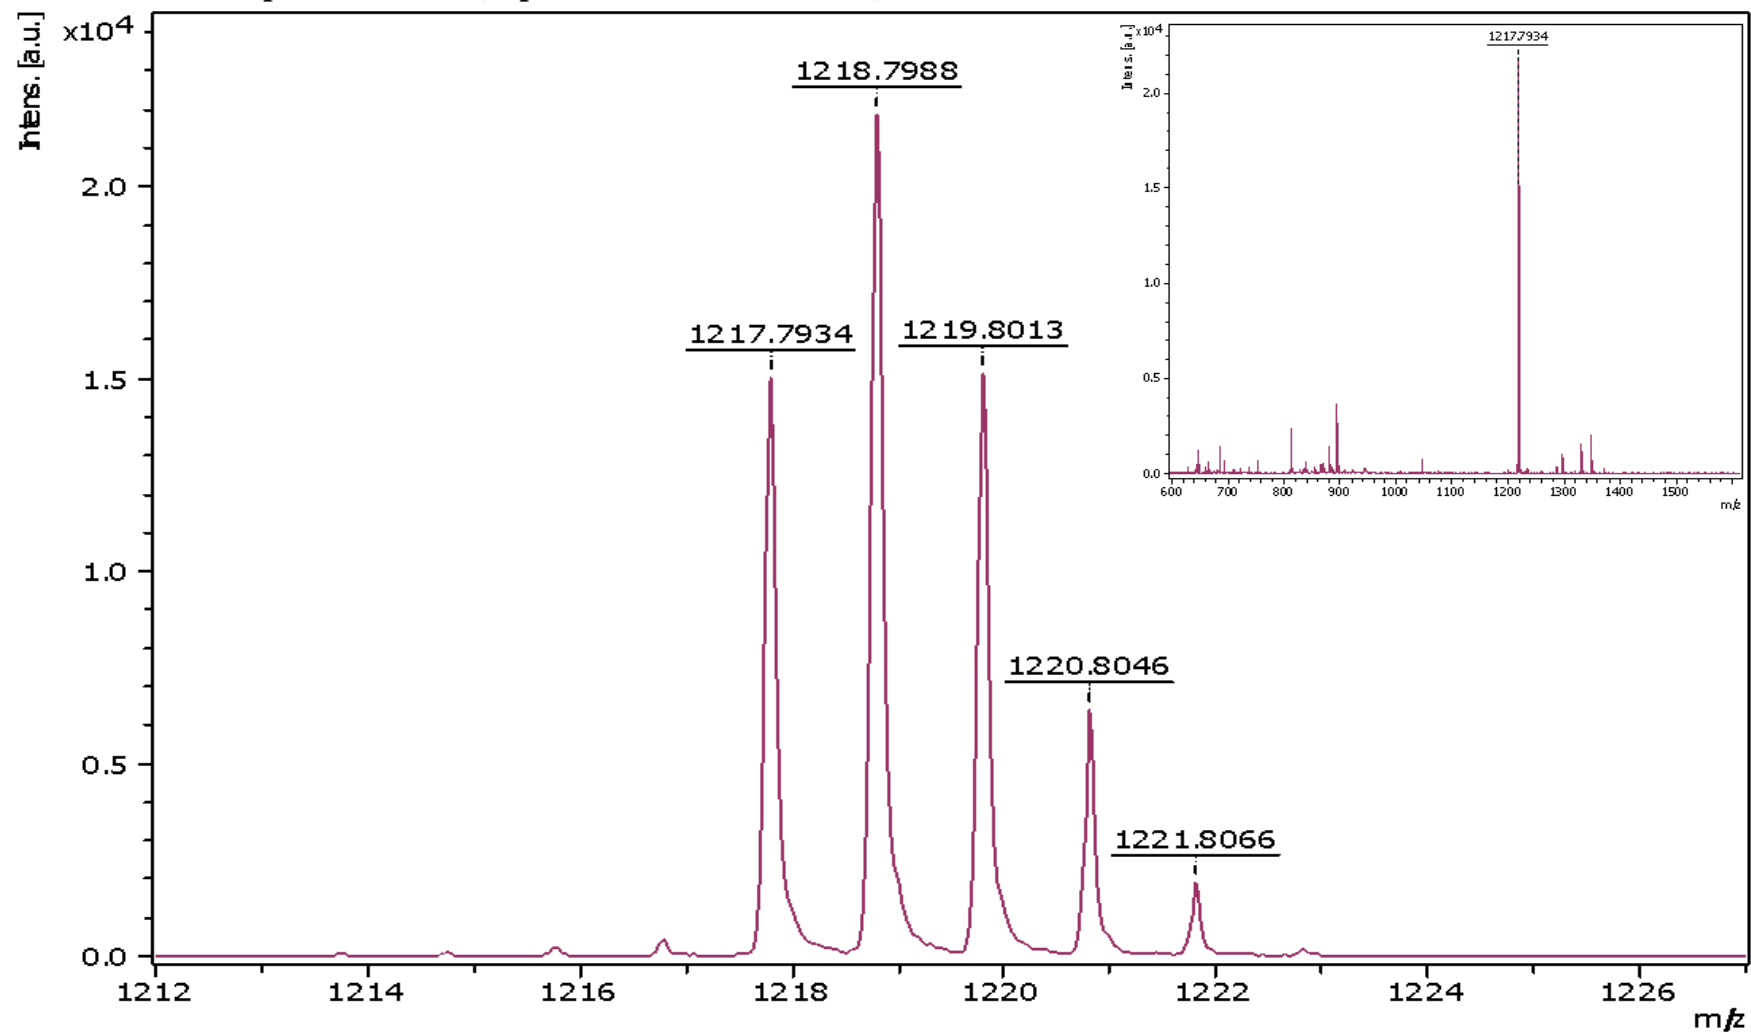



Electronic Supplementary Information (ESI) for Organic & Biomolecular Chemistry

MALDI-TOF MS spectrum for 2b (Pepmix as external standard)

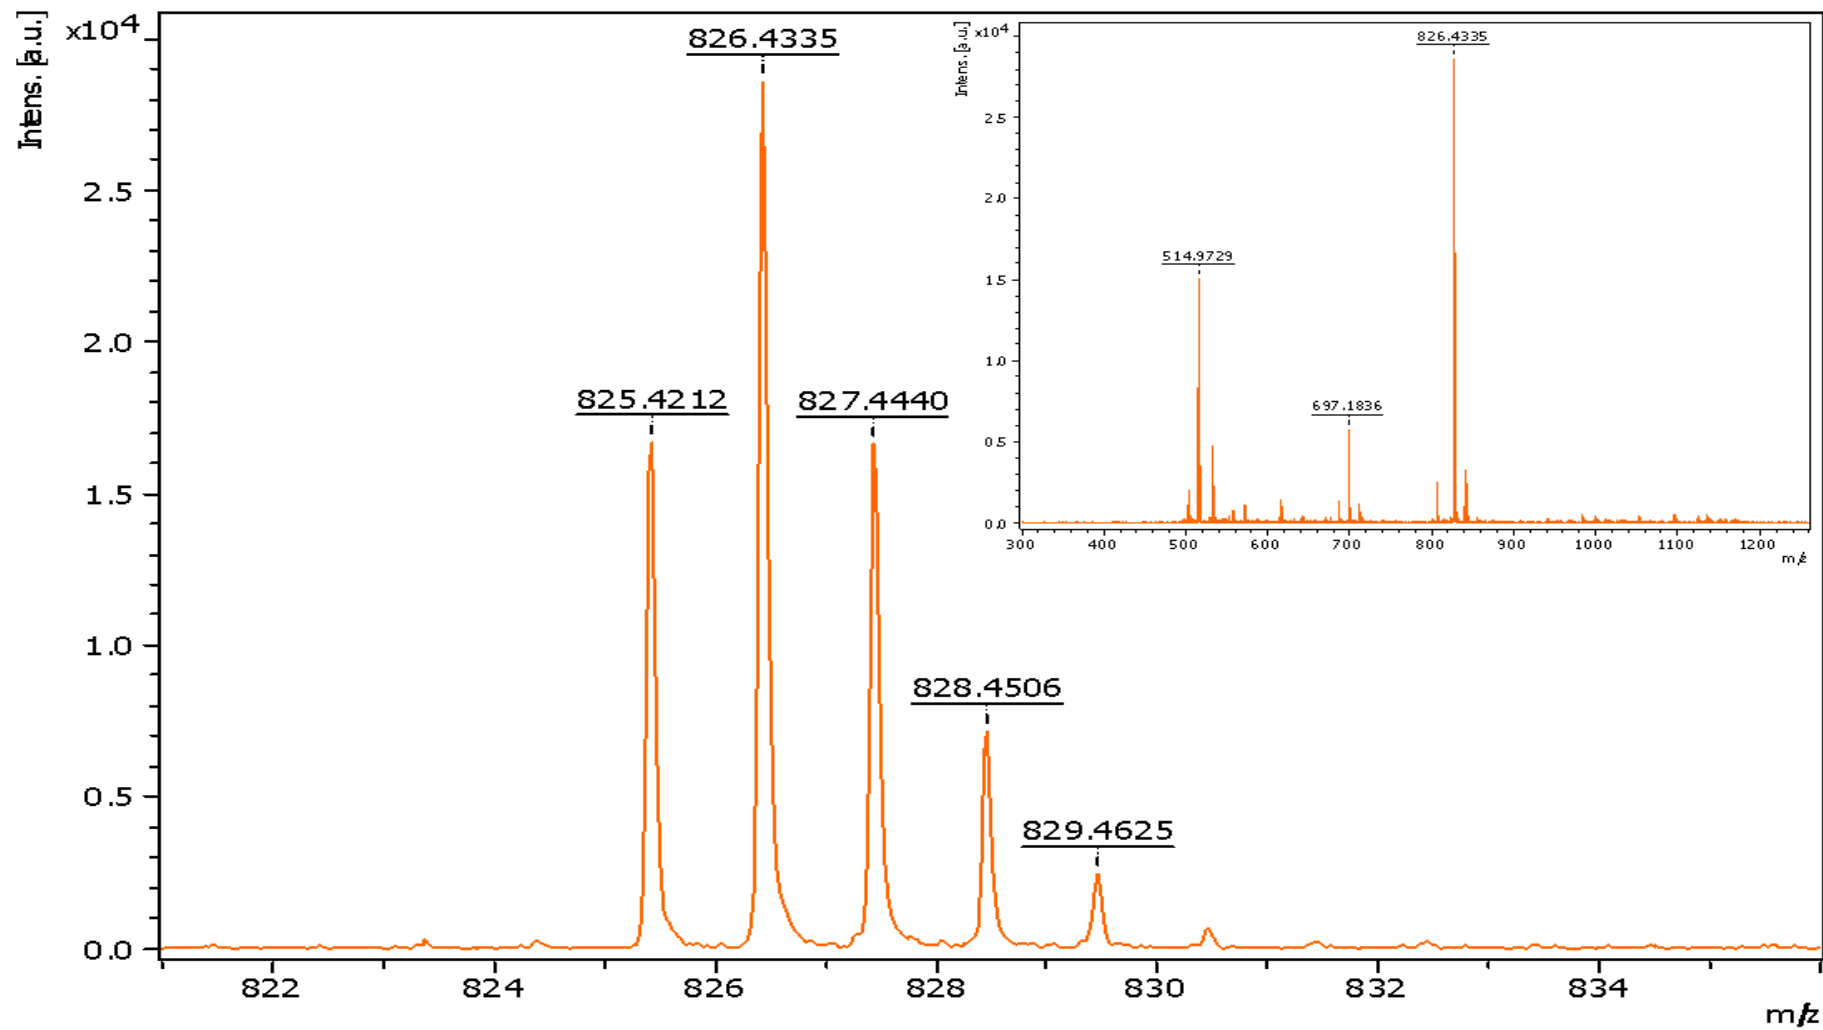

*Electronic Supplementary Information (ESI) for Organic & Biomolecular Chemistry*

**MALDI-TOF MS spectrum for 3 (Pepmix as external standard)**

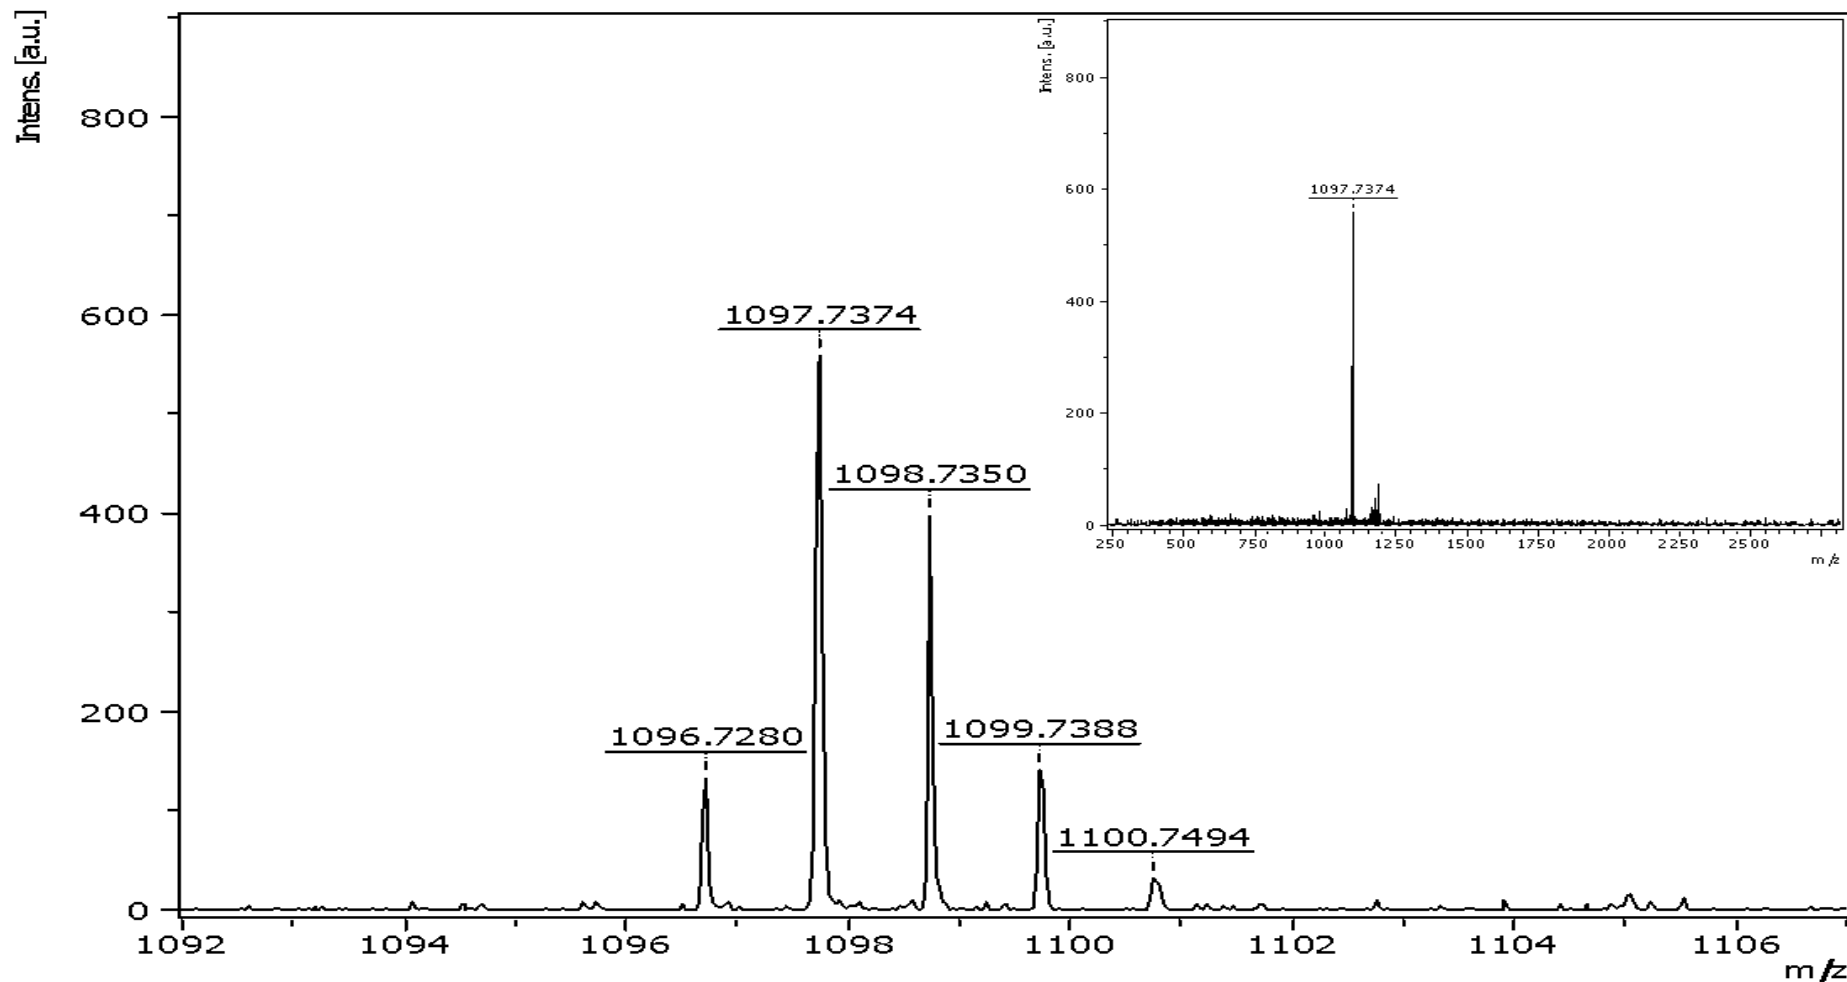

*Electronic Supplementary Information (ESI) for Organic & Biomolecular Chemistry*

---

**11. Reference**

- 1) Hu, J.; Zhang, D.; Harris, F. W. *J. Org. Chem.* **2005**, 70, 707.
- 2) (a) Arp, F. O.; Fu, G. C. *J. Am. Chem. Soc.*, **2005**, 127, 10482. (b) Qu, H; Luo, J; Zhang, X; Chi, C. *J. Polym. Sci. Part A: Polym Chem.*, **2010**, 48, 186.
- 3) Qu, H; Cui, W; Li, J; Shao, J; Chi, C. *Org. Lett.*, **2011**, 13, 924.
